# Supplementary material for: New Genetic Biomarkers Predicting Azathioprine Blood Concentrations in Combination Therapy with 5-Aminosalicylic Acid
Source: PLoS One. 2014 Apr 24;9(4):e95080. doi: 10.1371/journal.pone.0095080 (PMC3999094; doi:10.1371/journal.pone.0095080)
Supplement: Figure S5 — AZA/5-ASA-induced EAI detected with ExpressGenotyping analysis. Criteria: AZA/5-ASA-induced EAI≥2. (XLSX) [file pone.0095080.s005.xlsx]

## Sheet: Sheet1
Probe Set ID	dbSNP RS ID	Gene	GM18940	GM18942	GM18943	GM18944	GM18945	GM18947	GM18949	GM18951	GM18952	GM18953	GM18956	GM18959	GM18960	GM18961	GM18964	GM18965	GM18966	GM18967	GM18968	GM18969	GM18970	GM18971	GM18972	GM18973	GM18974	GM18975	GM18976	GM18978	GM18980	GM18981	Count
SNP_A-2274883	rs10213166	2011-03-01			0.85			2.31				1.06			1			1.02			1.04			1.47	2.89	1.2		1.05	2.14	5.03			4
SNP_A-8394278	rs1355504	2011-03-01			1.03		1.12		1.45			0.83								1.49		1.11				0.85	0.92	0.99		2.54			1
SNP_A-8602888	rs13130399	2011-03-01	1.12							0.63	1.59	0.95				0.61	1.17		1.05	0.85	1.03			1.48			1.26		1.1			2.12	1
SNP_A-8635136	rs6536737	2011-03-01			0.88	0.93	1.04	0.81				0.9			0.87				1.26		0.82			0.89	0.99	1.4	1.33	1.78	0.97	2			1
SNP_A-1801102	rs12782608	2011-03-08									0.99							0.76						0.98		0.81		3.03				2.6	2
SNP_A-1915702	rs17157919	2011-03-08									1.05							1.09						1.15		1.02		1.18				2.48	1
SNP_A-1919910	rs4949006	2011-03-08	1.04	0.88		1.15	1.12	0.9			0.89			1.12	0.89	0.97			0.92		1				0.97	1.08	0.82			1.15	2	1.46	1
SNP_A-2128715	rs10900227	2011-03-08				2.29		0.88			1.04				0.9	0.8	0.93				1.06			1.3	0.86	1.66	1.2			1.12	1.46		1
SNP_A-2154997	rs11079483	2011-03-10													2.51			1.12				0.86				1.02							1
SNP_A-1854670	rs16868050	2011-03-11								2.82																							1
SNP_A-2133605	rs6818075	2011-09-11			0.99	2.32				1.11	1.18				0.97					1.04				0.91									1
SNP_A-2125112	rs7040243	2011-12-01	1.55		0.94				0.76			0.81		3.57					1.18		1.7						2.01			1.3			2
SNP_A-4219002	rs916553	2011-12-01	0.84				2.17	1.03													0.52						1.46						1
SNP_A-8715948	rs4979517	2011-12-01	1.16		1.51	1.54			1.68						1.4	1.57	2.51		1.33		2.6	0.94		0.63	1.44				0.94	1.5	0.93		2
SNP_A-8672458	rs763786	---							2.39										1.07				1.42								1.31		1
SNP_A-2000683	rs17591964	A1CF																														3.45	1
SNP_A-1797832	rs13331885	A2BP1																				2.67											1
SNP_A-1936446	rs8050278	A2BP1				1.56			0.92										2.02	0.82					1.04								1
SNP_A-2004507	rs6500828	A2BP1											2.2						1.08			0.64											1
SNP_A-2053019	rs1038105	A2BP1																				2.76											1
SNP_A-2135286	rs6500760	A2BP1	0.75																				2.29										1
SNP_A-4192505	rs1352157	A2BP1		0.95			1.4	1.38	1.6	2						2.21	2.17	0.8		1.49		1.07		1.21		1.02		1.65	1.36		1.65		3
SNP_A-4216899	rs9931343	A2BP1								1.75						0.8						1.37		1.1					2.11				1
SNP_A-4297294	rs7185031	A2BP1		1.08	0.92											2.1	0.75			1.28				1.19									1
SNP_A-8333088	rs17139246	A2BP1		1.13					0.82			1.13	1.17	2.42	1.68	1.62	1.26	1.39		1.28		1.44	1.34	1.26	1.1	0.88		0.95		0.89		1.11	1
SNP_A-8355116	rs722314	A2BP1								0.86		0.94										2.9		1.07									1
SNP_A-8375816	rs8058875	A2BP1	0.63		0.52						1.3		0.75	1.42		0.83				0.55	0.8			2.62			0.87		0.91				1
SNP_A-8387112	rs17670111	A2BP1																											1.06			2.06	1
SNP_A-8435860	rs4267321	A2BP1																				2.24											1
SNP_A-8456340	rs11077009	A2BP1						1.24				1.48		1.72	2.14	1.18		1.29	1.15		1.24			0.92	1.06			1.18	1.05	1.28	1.11		1
SNP_A-8500786	rs4786118	A2BP1	0.98					0.93		0.83		0.89		0.93	1.04		0.85				1.01		0.9	1.38					2.17	0.96	0.97	0.98	1
SNP_A-8503445	rs12923371	A2BP1	0.96	0.99	0.87			1.15	2.45				1.27		2.12		2.13				1.61		1.37	1.24	1.14			1.07					3
SNP_A-1886592	rs1522354	AADACL1																				0.89		2.19									1
SNP_A-1908126	rs9862424	AADACL1		1.16					2.81					1.42					0.68						1.43								1
SNP_A-8307600	rs9866214	AADACL1		0.8					1.33					1.66					0.93						2.11								1
SNP_A-8682821	rs9845799	AADACL1							2.13										0.82														1
SNP_A-8619565	rs16863597	AADACL2					1.29																	3.13									1
SNP_A-2191718	rs7554	AASDHPPT			0.67			1.35	0.93		0.93	0.99			1.11	1.05		1.23	1.3	0.77	0.97				0.87	1.11					2.16	0.8	1
SNP_A-1924255	rs2016284	AASS							1.74																						2.38		1
SNP_A-8513928	rs8077789	AATF		0.88		0.93			0.83	0.69		0.98		1.2				0.87	0.79					1.07							2.31		1
SNP_A-4267633	rs3905000	ABCA1				2.05										1.07																	1
SNP_A-8340741	rs4742927	ABCA1	0.52	0.39		1.25							0.65						1.6	1.26							0.88	2.51					1
SNP_A-1837102	rs8074654	ABCA10	0.67	0.95			0.7			1.31		1.31	0.69		1.18					0.96		1.35		0.72		0.99	0.98		2.68				1
SNP_A-8589146	rs4968852	ABCA10	0.82	0.84						1.56	2.23		0.81							1.1		1.14				0.84		1.11	1.76			1.43	1
SNP_A-1893310	rs4324319	ABCA12	1.01		0.74	2.95						1.48	1.08	0.83				0.87		1.27	1.1						0.94		1.73				1
SNP_A-2127342	rs17430358	ABCA12	0.72		0.63	0.69				1.74		1.16	0.65	2.14	2.27		1.41							1.08			0.96		0.84				2
SNP_A-1831753	rs10280481	ABCA13		0.98		1.03				0.85			0.72	1.08		1.22		1.28	2.29			0.99	1.5	0.84	1.02	0.92	0.63		0.83	1.17		0.81	1
SNP_A-2042796	rs17132163	ABCA13										3.7		0.89	0.97																1.03		1
SNP_A-2062759	rs41329345	ABCA13		1.08		1.1	0.61				2.19		1.02	1.1		1.02	0.97														0.81		1
SNP_A-2259858	rs11077858	ABCA9		1.35					1.43			1.22			2.17			0.95		1.16	1.38	1.17		1.58					1.04	1.89	1.85	1.31	1
SNP_A-4266462	rs4148733	ABCB1		1.07						1.42				2.28	1.42			1.27											0.86			1.35	1
SNP_A-8378551	rs7787082	ABCB1	1.02					0.84	1.13					1.37	1.12		1.46	0.97	0.98	0.9	0.85	1.34	1.24			2.27					0.71		1
SNP_A-8671640	rs1202184	ABCB1	0.75	0.85					2.11	1.08	0.89			1.89	2.66		2.16	1.5			1.81	0.65	1.45	1.06				1.18	1.84		1.58	2.11	4
SNP_A-1965778	rs2287616	ABCB11																												2.72			1
SNP_A-8323935	rs853776	ABCB11	0.82		0.86																									0.62	2.34		1
SNP_A-8337920	rs2685805	ABCB11	1.19	0.75	0.8		0.47	0.92	1.01	1.29	1.64					1.15		1.23			1	0.92							1.2	2.31	0.87		1
SNP_A-2026324	rs31670	ABCB4			1.13	2.04				1.17	1.06						1.04		1.25	1.04		1.01		1.04		1.03	1.09						1
SNP_A-8713859	rs4148399	ABCC2			0.94							1.19				1.2		0.67		0.92	1.14	1.01	1.69						2.13				1
SNP_A-1807764	rs1678396	ABCC4		1.16					2.95	1.21		0.91											0.81	1.01	1.02	1.25	0.62						1
SNP_A-1822310	rs4148546	ABCC4		1.05			1.06			1.36	0.78	0.91	0.96	0.91		0.92			1.28			0.97				1.05	0.99	1.03	0.85		2.7		1
SNP_A-1856820	rs7317112	ABCC4	0.75	0.99	1.13			0.82		1.18			1.27						1.24	1.1	0.95	1.5		2.18			1.04	2.48	0.98				2
SNP_A-1915774	rs4148542	ABCC4		0.99			1			1.27	0.84	1.09	0.95	1.03		0.87			1.21			0.85				0.94	1.17	0.85	0.85		2.19		1
SNP_A-8398691	rs7988595	ABCC4		0.94																				1.02	1.02		1.06	2.24					1
SNP_A-8412459	rs2766481	ABCC4		0.86			1.16	1.16	2	1.55	1.95						1.6	1.12			0.86	1.02		1	1.09		0.91		0.91	1.37	1.06	1.17	1
SNP_A-8487017	rs3818494	ABCC4		1.13	1.13		1.22	0.97	1.34			0.39	2.66						0.85		1					0.88	0.86	2.17	1.13				2
SNP_A-2076217	rs1283807	ABCC9								0.5										0.98		1.78			0.82				1.54		2.42		1
SNP_A-2300807	rs4148665	ABCC9						0.76		1.35	1.49	1.09	0.82	2.18		1.02			0.97	1.02		1.47	1.32		1.19				1.02	1.96		1.05	1
SNP_A-8310054	rs1283817	ABCC9	0.77																						2.21								1
SNP_A-8365169	rs697252	ABCC9	1.12					1.13	1.45	1.23	0.99	1.03	2.56					1.52		0.63		1.43			0.88				1.99	1.12		2.49	2
SNP_A-8569103	rs4148664	ABCC9										0.84					0.88		1.11					2.39					1.54			0.72	1
SNP_A-8608888	rs3782667	ABCC9													0.95										2.63			0.87					1
SNP_A-8693047	rs829079	ABCC9	1.04			0.8				0.72	1.44			1.1	1.04		2.24								1.64								1
SNP_A-8615572	rs4847303	ABCD3	0.6			1.97				0.86	1.01	1.07	0.98	0.87			0.94	1.07		0.84			1.27	2.16			0.73						1
SNP_A-4242654	rs3804765	ABHD10				1.81		1.17		1.04			0.67			0.96	1	0.89		1.21	1.1	1.14	1.58	0.74	1.39	1.15	1.06	1.45	1.73			2.13	1
SNP_A-1890432	rs16842839	ABI3BP			0.67						0.97		0.24			2.19	1.07									0.8							1
SNP_A-2055450	rs10749165	ABLIM1	1.1	0.94		1.2		0.98										0.93	1.02	0.81		2.1		0.97				1.45		1		1.02	1
SNP_A-8289939	rs2497733	ABLIM1			0.99	0.83		1	0.94					2.31		1.52		0.98	1.05			0.62	0.73				1.11		1.44	1.71			1
SNP_A-8646848	rs3802734	ABLIM1	0.97			2.02			0.94						1	1	1.01	0.95					1.1	0.91		0.88	0.98		1.09		1.04		1
SNP_A-1891105	rs2542655	ACACA	0.99	0.96	0.74		1.51			1.31	0.87	1.34		1.26		0.83	0.95		1.09			1.1	1.07		1.05	0.9			0.97		2.06		1
SNP_A-2217843	rs2302803	ACACA	0.9		0.98	2.2	1.09				1.62		1.44				0.99	1	1.22		1.31	0.79					1.05	0.97	1.27	1.15			1
SNP_A-4261196	rs2921368	ACACA	0.98	1.03	0.94		0.84			1.46	1.16	0.99	1.03	0.91		0.87	0.94		1.31			0.79	1.39		0.98	1.15			1.21		2.19		1
SNP_A-4271600	rs7213581	ACACA														2.96																	1
SNP_A-8471636	rs2590728	ACACA	0.99		0.97		1.08				0.94		1.28				1.03		1.49		1.09	2			0.97		1.16	1.04	0.92	1.21			1
SNP_A-8624852	rs4795194	ACACA	1.14	1.02			1.7	1.6			1.44			1.41		1.19	2.07		1.15			1.04	0.87	0.9					0.98	1.62	1.5		1
SNP_A-8633435	rs2542663	ACACA	1.39	0.96	0.78		1.12							2.17			1.53					0.79			0.85	0.98			0.88			1.51	1
SNP_A-4283935	rs10798769	ACBD6	0.94	0.97	0.86	3.81	1.25			0.89			0.75			1.1			0.77			1.1		0.97	1.05	0.95			1.21		1.36	1.07	1
SNP_A-1848220	rs4794969	ACCN1					1.13											2.3		1.05							1.01	1.12					1
SNP_A-2026383	rs4411544	ACCN1														2.04																	1
SNP_A-2115828	rs11657877	ACCN1	0.78		0.9		1.17	0.96		2.09			1.2		1.25	1.51	1.47		1.36	1.09	0.91	0.92				1.22	0.88				0.7		1
SNP_A-8392808	rs2046902	ACCN1			1.27	1.17			0.47	2.04			1.6			0.76	1.24		1.46						0.78		0.96				0.26		1
SNP_A-8405036	rs4794951	ACCN1	1.19	0.66			1.47			1.84	1.15	1.18		2.06				1.08					1.17		1.12						1.06		1
SNP_A-8550999	rs8069370	ACCN1				1.05	1.49		1.2	2.08	1.22		2.14			1.46	1.54	1.39	1.75		1.72				1.16	0.77	0.91	1.13			1		2
SNP_A-8365307	rs8020434	ACIN1		1.05				0.96		1.25						0.92		1.23		0.85					0.8			2.43					1
SNP_A-2187613	rs2143337	ACOT13		0.83			0.97											0.91						1.07				2		1.23			1
SNP_A-2123095	rs1561476	ACOXL		0.69			1.21												2.03	1.11						0.9			1.01			1.6	1
SNP_A-2172859	rs7420999	ACOXL	0.96		1.17		0.88				1.03			0.79	1.07	1.3			1.11	1	1.01	0.74	0.84	0.89		1.05	0.92					2.28	1
SNP_A-2178616	rs17041661	ACOXL											1.06			2.48																	1
SNP_A-2263662	rs13032068	ACOXL															2.01																1
SNP_A-8551958	rs3777069	CLINT1	0.91	0.84	1.16	2.65	1.97											1.38										1.12				1.13	1
SNP_A-8524657	rs10185377	ACOXL	0.91		0.98				1.16		1.05			0.82		2.27			0.71	0.82	0.91	1.23		1.67		1.01	0.82						1
SNP_A-8563733	rs7603798	ACOXL					2.22		0.95	1.04		1.18			0.81	1	1.27			1.12							0.59				1.28		1
SNP_A-8574400	rs1837372	ACOXL				1.08	1.2		1.08		2.09				1.46				1.03	0.97			1.31				0.94						1
SNP_A-1974379	rs2310230	ACPP	1.01			0.98					1.5	0.65			3.97		0.83			0.77				1.25						0.88			1
SNP_A-1974380	rs2310229	ACPP	1			1.44						0.45	1.21		3.21					0.73				0.95					0.89	1.04			1
SNP_A-8588948	rs17241868	ACPP				2.02																			1.03					1.23			1
SNP_A-1868323	rs11936062	ACSL1	0.89	1.06				0.84	1.38		0.77			1.31		0.77		1.04	0.68	0.98			0.97				0.95	0.71	1.29		1.33	2.65	1
SNP_A-4249064	rs12258754	ACTA2	0.97		0.74			1.23		0.98	1.15	0.82		1.27	1.06	0.97	0.96		0.96		1.45		1			1.14				1.13	2.06		1
SNP_A-8318861	rs2902336	ACTA2		0.91							2.53											0.96											1
SNP_A-8472972	rs7907084	ACTA2									2.33											1.02						1.6					1
SNP_A-2163421	rs4726211	ACTR3B	1.1	0.89						0.89			1.18		0.87			0.9						2.86						0.64	0.9		1
SNP_A-2141499	rs843675	ACYP2				0.84	1.25			1.25	0.95			0.9		0.76	0.7		0.74			1.37			1.28	1.29	0.85		1.13			3.26	1
SNP_A-8628023	rs13417064	ACYP2	1		1.38	0.5			2.67						1.29		0.94	0.99		0.65	0.72	0.71		0.7			0.63	1.02					1
SNP_A-8685631	rs10173565	ACYP2	0.68		0.82				0.66	1.02							1.23	0.9		2.24	0.84	1.12		1.71		1.03	1.68	1.36					1
SNP_A-1853209	rs16940651	ADAM10	1.17	0.96	0.88	0.96			0.97			0.99	1.03	1.11	0.88		0.93	1.13	0.99	1.03	0.92		1		0.91			2.34	0.88	0.7			1
SNP_A-2286962	rs6494031	ADAM10	1	1.18	1.02	1.23			1.37			0.92	1.13	1.4	0.75		0.9	1.23	0.93	1.37	0.74		1.07		1.04			2.57	0.73	1.16			1
SNP_A-8570912	rs11071393	ADAM10	0.98	0.96	0.98	2.35			1.33			1.22	0.85	1	0.92		0.98	1	1.13	1.05	1.05		1.02		0.95			0.91	1.02	1.31			1
SNP_A-8701791	rs7180487	ADAM10			1			1.04					1.19	1.4	0.79		1.1											2		0.99			1
SNP_A-2023138	rs7920091	ADAM12	0.96												1.29								2.14		0.92			2.99	1.21				2
SNP_A-4200192	rs11244778	ADAM12	0.94																				2.12					1.02	1.2				1
SNP_A-8336410	rs7902734	ADAM12		1.34				0.7			1.2				1.05		1.17			0.86	2.53		0.98			0.78		1.3	0.99		1		1
SNP_A-8543812	rs2138279	ADAM12	0.75	0.83								1.06		1.25		1.97		0.6	0.77				0.85						1.12	1	2.33		1
SNP_A-8446567	rs7838350	ADAM18	1.74				0.9		1.28		1.79				1.74	1.6			2.4	1.42	2.71							1.23	1.26				2
SNP_A-2046459	rs13179607	ADAM19							2.02											1.68				1.02			1.17				1.54		1
SNP_A-1948789	rs12539024	ADAM22				0.76		0.93	1.03						1.18	1.18		0.73	0.89	0.87				1.38		1.78	0.76				0.93	2.08	1
SNP_A-2145063	rs2282952	ADAM22				0.97		1.15	1.52						0.93	1.02		1.48	1.08	1.33				1.03		1.23	0.91				1.63	2.15	1
SNP_A-8567546	rs4140919	ADAM22		1.06	0.97		1.17	1.13	2.13	1.32				1.17	1.01	0.96		0.89	0.96					0.96	1.13	1.2							1
SNP_A-2078241	rs3821172	ADAM23					1.62			2.75	1.38			2.62				1.3	1.43			1.34					1.02				2.07		3
SNP_A-8448446	rs4512386	ADAM28			0.84	2.65	1.62			1.05		1.1						1.63			1.1		0.89	1.05		1.14	1.08	1.41	1.04	1.23	1.03		1
SNP_A-8545118	rs7829503	ADAM28	0.97		0.86	0.75	2.09													1.69	0.95		1.15										1
SNP_A-8593881	rs5012230	ADAM28		1.01	0.8		1.17	0.7		0.71	2.03	0.57						0.98	0.94				0.97								1.32		1
SNP_A-8405648	rs4236755	ADAM32													2.17	2.48	1.45	1.2		1.6									0.78			0.82	2
SNP_A-8466646	rs7016661	ADAM32					2.55																								0.74		1
SNP_A-8432778	rs13256952	ADAM9			1.02	2.07			1.03			0.85			1.04	1.92		1.11		1.24		1.01			0.88	1.19	0.84		0.99			1.13	1
SNP_A-1799891	rs4279343	ADAMTS12								1.13	0.89	0.7	2.04	0.88	0.63	0.73	0.84	1.22	0.71				0.96		1.01	1.32	1.5	1.17	0.93		0.9		1
SNP_A-1930850	rs12520271	ADAMTS12		1.24			1.12			2.34	0.97	0.91			1.21	0.86			1.06	1.23	1.02				1.48		0.91	2.24	1.44	1.38	1.75	1.14	2
SNP_A-2029635	rs13160471	ADAMTS12	1.11							1.08					2	0.99			1.17		0.98							1.02	1.12	0.92	1.03	0.99	1
SNP_A-2038411	rs10472230	ADAMTS12																	1.13				1.36			1.13			2.04				1
SNP_A-2072165	rs2910639	ADAMTS12																										1.14	2				1
SNP_A-2127213	rs6868223	ADAMTS12	0.87		0.99			1.03					1.44		1.1	2.04		1.23	0.79				0.89		2.39	1.2			1.14			1.2	2
SNP_A-2248324	rs3935844	ADAMTS12	1.13		1.06			1.06					0.99		0.89	1.07		0.93	0.88				0.87		2.11	0.99			1.15			0.97	1
SNP_A-4243344	rs2277010	ADAMTS12	0.92		1.08				2.16		1.09		1.11				1.22	1.21				0.72				0.92		1.63			0.8		1
SNP_A-4264818	rs10521006	ADAMTS12		1.28			0.6		2.1		1.22	1.04			0.7	1.25			0.53	1.35	0.93				0.55		1.01	1.57	1.25	0.82	0.98	0.87	1
SNP_A-8365733	rs11952033	ADAMTS12									1.08		1.71					1.15					1.05	2.65	0.73	1.01		1.01	1.22	1			1
SNP_A-8437485	rs13153550	ADAMTS12					0.89			1.93	1.42	1.23	1.8	2.34	3.06	1.81	2.05	1.07	1.37				0.85	1.64	0.98	1.11	0.82	1.43	1.55		1.26		3
SNP_A-8516601	rs10472888	ADAMTS12	1.16					1	1.01	1.11		0.94	1.43	1.22			1.1	0.79	0.76		1.07	2.05			2.44		0.96				0.93	0.91	2
SNP_A-8660785	rs1374023	ADAMTS12			0.98		1.12	1.04			2.11		1.52			0.74						1.1	1		0.88	0.81		2.25		1.7	1.93		2
SNP_A-1980419	rs1816235	ADAMTS16																		0.97							2.02						1
SNP_A-8665052	rs1593857	ADAMTS16			1.07		1.02	0.89							1.71	2.13							1.07	0.92			0.93						1
SNP_A-1922480	rs4965271	ADAMTS17						2.14	0.67	1.9			0.44								0.98		0.64								1.84		1
SNP_A-2063716	rs4965273	ADAMTS17		0.96				1.7	0.93	3.57			0.28	1.17		1.28	1.54	0.98			0.93		1.05				1.41			2.14	1.37	0.68	2
SNP_A-2310558	rs727859	ADAMTS17						1.46	0.78	1.02			0.53										0.63							2.17			1
SNP_A-4276741	rs12901824	ADAMTS17					2.46																										1
SNP_A-8377140	rs6598306	ADAMTS17															2.02		1.16												0.8		1
SNP_A-8653622	rs4561451	ADAMTS17																	1.45							3.34	0.76						1
SNP_A-2163017	rs2650911	ADAMTS18											1.08																			2.06	1
SNP_A-8427264	rs7724326	ADAMTS19		0.87		2.39	1.26				1.19				1.24				1.04	1.02	1.04					1.17							1
SNP_A-1853497	rs715676	ADAMTS6																								1.23				1.28	2.02		1
SNP_A-1945537	rs9291832	ADAMTS6	0.74		1.43	1.74				1.86		0.81	1	2.3	1.71	2.31	1.08							1.25		1.24	0.64			1.32	2.32		3
SNP_A-1948114	rs2640717	ADAMTS6	0.8		1.02	6.41	1.17				1.92						2.42					1.21						1.46				1.84	2
SNP_A-2132290	rs9291837	ADAMTS6	0.79	1	0.98			1.63				0.94		1.03		1	2.66		1.11		0.83			1.21		1.62			1.12			1.86	1
SNP_A-2214755	rs10940034	ADAMTS6	1.14		1.25									2.55													1.2						1
SNP_A-2263254	rs12516283	ADAMTS6	1.14		1.18				2.45			1.29		2.17				0.83						1.97		2.82	1.18						3
SNP_A-2283381	rs6864345	ADAMTS6			1.48				0.67	2.34		0.86	1.32		0.71	0.88		0.66	0.86		1.28			1.25		0.69				1.09	0.91	0.83	1
SNP_A-4231565	rs10471661	ADAMTS6	1.63		0.6									2.02													1.05						1
SNP_A-8331823	rs9291836	ADAMTS6	0.74	1.05	0.98	2.17	0.99	1.06			1.22	0.97				0.93	1.02		0.86		0.81			0.86				1.8				0.98	1
SNP_A-8420321	rs7710950	ADAMTS6	0.59		0.91						2.05											1.04											1
SNP_A-8499669	rs10038927	ADAMTS6	1.79		0.75	3.81					1.4			1.44								0.77					0.71	0.79					1
SNP_A-8516266	rs7706677	ADAMTS6			1	1.45		0.86	0.87	1.69		0.95	0.84	1.56	1.59	1.18	0.96	1.17	0.8	0.84	0.96			0.83		0.85				0.92	2.25		1
SNP_A-8538355	rs10805395	ADAMTS6			0.94			0.87	0.84	2.07		0.94	0.9		0.86	1.56		0.93	0.85		0.62			0.97		0.76				1.12	1.26		1
SNP_A-8546521	rs11739829	ADAMTS6		1.49				2.48				1.07		1.18		1.05	1.83		1.08		1.4			1.27			1.44					1.06	1
SNP_A-8551103	rs10053844	ADAMTS6																	0.99		1.31									2.01		0.87	1
SNP_A-1799637	rs9851598	ADAMTS9		1.32		0.84	2.06	1.7	1.85	2.42	0.92		0.84						0.89		1.04	0.68						0.68					2
SNP_A-1781507	rs16937066	ADAMTSL1	2.25	0.92																										1.84			1
SNP_A-2074235	rs10963792	ADAMTSL1									1.64			0.72						0.88	1.1	1.08				1.1		1.87	2.25				1
SNP_A-2234082	rs7042159	ADAMTSL1				1.26		1.05				1.02				1.18		0.91			2.7				0.96	1.13	1.14		1.41	1.04	1.66	1.32	1
SNP_A-2244053	rs7863100	ADAMTSL1	1.07										1.02				0.98	1.15	0.93			1		2.16									1
SNP_A-4216013	rs367986	ADARB1					1.02		0.85	1.12	1.11		0.8	0.87		0.89		3.02		0.97	1.1	0.62	1.01	1.02					0.78				1
SNP_A-8346094	rs17004743	ADARB1			0.99	0.6				4.36	1.41	0.87											0.72		1.1	1.12	0.89				1.67		1
SNP_A-8579393	rs2838787	ADARB1										2.27	0.61								0.94												1
SNP_A-1780606	rs4880820	ADARB2							0.81			1.45		2.12			1.03		1.15		0.82				0.98		1.14	1.64		0.67			1
SNP_A-2187906	rs11596382	ADARB2		0.86	0.99				2.12						1.17			0.88			0.99		1.12			0.96							1
SNP_A-2207306	rs10903496	ADARB2					0.68	0.98			0.85					1.53				0.66			0.91	1.06	1.06					2.74		1.17	1
SNP_A-8302474	rs11250696	ADARB2	0.95		1.06	0.8	1.02						0.57		1			0.95	1.12	1.19				0.77		0.98	1.01			2.37			1
SNP_A-8482397	rs10751801	ADARB2	1.22					0.66			2.14			1.3					1.2						1.35								1
SNP_A-8555194	rs6931421	BCKDHB					2.04	1.06	1.7	0.96		1.23	0.91		1.25			0.78			0.99					0.96	0.94	1.03		1.75	1.38	0.91	1
SNP_A-1865656	rs9639924	ADCY1		0.78		1.03					1.05		1.29	1.03	0.81		1.45	0.67		0.6		0.85						3.36	1.18	1.06	0.75	1.07	1
SNP_A-8569829	rs203818	ADCY10	1.36			2.25		1.67					1.14						1.15	0.51										1.36			1
SNP_A-8603804	rs11675457	ADCY3	1.06	1.11	0.98		0.88			0.96			0.96		2.39	1.01							0.78			0.84	0.98	0.85	1.12			0.92	1
SNP_A-2314891	rs16904374	ADCY8	1.25		1.52	1.74				2.04		1.01		2.3						1.33	2.08				0.97			1.19		1.55			3
SNP_A-8374951	rs448852	ADCY8									1.08	2.05	0.85		1.1				1.28			1.22	1.01			0.68	0.88						1
SNP_A-2277672	rs2267738	ADCYAP1R1				1.08											2.84		1.97				1.88		2.14								2
SNP_A-1959207	rs11194988	ADD3		1		2.38			1.71	2.08	0.87	1.07						1.36	1.07		0.99	0.91	0.93	1.18	1.23					1.12	1.11	2.33	3
SNP_A-4201328	rs2501574	ADD3	1.02									1.44								1.96								0.98	1.02	2.18	0.95		1
SNP_A-2070751	rs1229977	ADH1A													1.9				2.04														1
SNP_A-2294412	rs3805322	ADH4				1.06															3.33	0.86											1
SNP_A-1793522	rs11712615	ADIPOQ				1.85				2.6																							1
SNP_A-2252478	rs967367	ADIPOQ				2.8			1.21		1	1.13	0.74			1.05	0.96			0.88			0.98				1.13		1.02	1	1.81		1
SNP_A-8430758	rs7653389	ADIPOQ	1.04			2.04	1.19				1.34	1	1.16	0.83		0.96		0.97				0.98	1.38					1.4			1.04		1
SNP_A-8473122	rs16861421	ADIPOQ	1.1		0.97				1.12		1.01	0.64		1.16								1.34			2.01			0.94			1.9		1
SNP_A-8542341	rs16861319	ADIPOQ																	2.37							1.16			0.94				1
SNP_A-2032672	rs11061946	ADIPOR2	1.03	1.12		1.45	1.11								1.16									1.02			0.96	0.88	1.01		1.19	2.23	1
SNP_A-4273463	rs10773982	ADIPOR2	0.94		0.83	1.19	0.8			1.07							0.96							0.87					1.18			2.83	1
SNP_A-8445672	rs10773983	ADIPOR2	0.88	0.91	1	1.11		2.04					1.01	1.41	1.33	0.94								1.13	0.87		1.02	0.91	0.94				1
SNP_A-1928431	rs11001020	ADK				1.16																				1.17		4.52			1.4		1
SNP_A-2037644	rs12784355	ADK	1.06		0.85		1.43		0.88	1.11	0.78					2.04	0.99					1.09		1.07					1.37	1.6	0.9		1
SNP_A-2303282	rs16931294	ADK																								0.79		2.22			0.72		1
SNP_A-8344168	rs12416497	ADK	1.12		0.87		0.72		1.28	0.85						0.87	0.9					0.56		1.25					1.02	0.91	2.24		1
SNP_A-8306539	rs12026765	ADORA1	0.74			0.96		0.89		1.05					1.21	0.82	1.16			2.23	0.99		1.05	0.99				1.2		0.93			1
SNP_A-2063896	rs1337912	ADORA3															0.99									1.2						3.26	1
SNP_A-4261728	rs10489796	ADORA3	0.94		1.06		1.31		1.16	1.59	1	1.43	1.61	0.74		0.77				1.17	1.21		0.95	0.93	0.82		0.59		1.65			2.04	1
SNP_A-8394709	rs10776732	ADORA3	1.08		0.81	0.88	2.13		1.44	1.91	0.98	1.23	1.36	0.92		0.84				1.1	1.28		1.22	0.87	0.86		0.8		1.3	1.11		1.41	1
SNP_A-8353837	rs9549791	ADPRHL1						1.16				2.12	0.87				1.36			0.97				1.08		0.98	1.24					0.82	1
SNP_A-8660045	rs3739215	ADRA1A	0.76	0.91	1				0.87						1.43			1.13				2.88	1.03						1.04	1.26			1
SNP_A-8601611	rs16841369	AFAP1					0.69				1.17			2.43																			1
SNP_A-2234698	rs236676	AFF1		0.82		2.05		1.24		1.27		0.75		1.02		1.11					0.76		1.31			0.95	1.02		1.27			0.82	1
SNP_A-1876885	rs5980391	AFF2																								2.81					1.13		1
SNP_A-8289369	rs723445	AFF2															2.64														1.13		1
SNP_A-8289370	rs723446	AFF2															3.02				0.98								0.55			1.31	1
SNP_A-8304602	rs1442278	AFF2																								2.16					1.64		1
SNP_A-8323147	rs5936416	AFF2											1.07																2.06				1
SNP_A-8608635	rs6540393	AFF2		1.2									2.22								0.78					1.68							1
SNP_A-1818019	rs4621208	AFF3	0.68		1.21	2.24		1.21			1.31		1.28							2.53	1.07		1.2		1.1		1.3	1.03	1.05	1.87	1.04		2
SNP_A-1959912	rs4851231	AFF3		0.72		1.43		0.99			1.02	1.2					2.07				1.12		1.28					0.92	0.71		0.7		1
SNP_A-1964227	rs2030693	AFF3		0.9				0.52																				1.54		0.68	2.02		1
SNP_A-2134757	rs6732358	AFF3		1		2.23		0.92			0.91	0.9		0.53			1.05				0.82			0.73				0.98		1.3	1.07		1
SNP_A-2142897	rs9678859	AFF3		0.9				0.61																				1.75		0.77	2.61		1
SNP_A-2244687	rs6706188	AFF3			0.82					1.05					0.52									2.21									1
SNP_A-4198957	rs10176869	AFF3	1.37		0.84	1.21		1.28			0.82		1.08					0.84		0.62	1.35		1.07		1.06		0.76	0.68	1.32	0.97	2.02		1
SNP_A-4262106	rs4286327	AFF3		1.1				0.86				1.46									1.5		2.31					1.18	1.86	1.62	0.84		1
SNP_A-8376805	rs12473053	AFF3		0.74	0.76							0.9	0.74												2.06								1
SNP_A-8463873	rs6728983	AFF3		0.8	1.06			1.3						0.76												1.35		1.92		2.06	0.89		1
SNP_A-8586123	rs9679481	AFF3		0.89				0.74						1.78														2.09		1.21	1.85		1
SNP_A-1894602	rs3798128	AFF4					1	1.2		1.75		2.24					1.03	0.88			1.08		1		1.07		0.95	1.68					1
SNP_A-8494142	rs2525485	AFF4						0.91						1.32							2.02												1
SNP_A-2163528	rs7235296	AFG3L2		0.85	0.97				1.07	1.48	1.3			0.97							1.33				0.73				1.7			2.02	1
SNP_A-2229699	rs3786261	AFG3L2								0.82		1.15						0.86				1.13							1.48		1.95	2.16	1
SNP_A-1817907	rs4789580	AFMID	1.38		0.94	2.02				1.77	1.76		1.75		1.44	1.65			1.38				0.98										1
SNP_A-1868769	rs3828487	AGA	1.06	1.55					1.54	1.09	2				1.15									1.13									1
SNP_A-1816763	rs978814	BCKDHB					1.29		2.02			0.9	1.44		1.33			1.06		1.01	1.23					0.87	0.95	2		1.01			2
SNP_A-2004327	rs4493016	AGBL1					2.56																										1
SNP_A-2120540	rs12591965	AGBL1	1.44		0.79	0.35	1.39	1.4		1.38	1.93	1.67		1.13	1.4	1.13		1.88		1.66	1.27					2.52			1.16	2.04			2
SNP_A-2128385	rs1377101	AGBL1			1.55		0.79						3.11	1.4						0.87				1.25					0.94		1.2		1
SNP_A-2229170	rs12439060	AGBL1	1.74	1.42	1.83				0.82	1.25		2.04	2.47					1.51	1.52			1.03				1.75	1.61					0.9	2
SNP_A-8370702	rs11073660	AGBL1					1.95	2.7												1.23												1.72	1
SNP_A-4240652	rs6659225	AGBL4	1.95		0.98			1.08						1.13			1.5	0.93	1.09	0.98			1.07	0.76		2		0.95			1.09		1
SNP_A-8352567	rs12096331	AGBL4				2.42										0.89							1	0.94	1.02								1
SNP_A-4196164	rs4973181	AGFG1	0.98		1.02			0.99	0.82						1	0.74						1.03	0.99	1		1.05		1.58	1.37		2.13		1
SNP_A-2313787	rs17265801	KIAA1680													2.09														1.74			1.02	1
SNP_A-1833095	rs7528537	AGL				1.18															2.1			1.39			0.85						1
SNP_A-2000232	rs6577142	AGL					1.43		2.79	1.08			0.88				0.9	0.84			1.05		0.93	1.61	1.14	0.93					1.75		1
SNP_A-2058279	rs631797	AGL		0.84				1.34			1.51			0.96	2.1		0.83	0.8		0.89	0.88					0.7	1.4			1.55			1
SNP_A-2128965	rs2814038	AGL		0.73				2.08			1.68			0.69	1.27		1.39	1.03		0.76	1		1.09			0.91	1.25			0.67			1
SNP_A-1988388	rs747866	AGPAT4	0.83	0.91			0.84			1.3					2.39	0.82			1.39		1.17	1.14				0.87		1.03	1.17	1.22	0.97		1
SNP_A-4225559	rs7763278	AGPAT4			0.93			0.83	0.97					0.84			0.75		2.33				0.7			1.1	1.22	1.79					1
SNP_A-8550864	rs12662114	AGPAT4			1.39	1.52	0.91	1.01	1	0.98	0.94		1.24		0.88	1.03					1.02	2.63	1.12	1.13	0.94	0.87	1.03			0.99	1.05		1
SNP_A-2080565	rs17078053	AGPAT5		1.15		2.02							0.86				0.8	0.77	0.76			1.03	0.95	1.05			0.84	0.87					1
SNP_A-8569313	rs12618139	AGPS			1.12		1.09	0.65	0.97	0.93	1.02						0.93	1.21	0.87		0.96	0.89			0.75			1.02			2.12	0.98	1
SNP_A-2244121	rs11141031	AGTPBP1	1.11		0.84			1.08											0.95		1.47									2.93			1
SNP_A-4297507	rs11141068	AGTPBP1	1.18		1.11	2.59		0.83	0.9	1.57	1.15			1.36					1	0.98	0.88									0.82		1.02	1
SNP_A-4218657	rs6953598	AHCYL2	1.32	0.81		0.78		1	1.97		1.21			3.91		1.9			1.4		1.17	1.24	1.37		1.44		1.35		1.17		1.01		1
SNP_A-1850477	rs6908428	AHI1				1.35	1.06	0.96			2.22	1.02		1.42	0.95		1.08		0.94			1.05					0.99		1.3			0.72	1
SNP_A-8537852	rs2614264	AHI1	0.85			0.62	0.69	2.03		0.84		0.98		1.01	0.84		1.27		0.99			1.35					1.52		0.96			0.94	1
SNP_A-8671201	rs6931735	AHI1	1.2				1.4	1.16		0.78	1.5			1.07	0.56		0.46		0.74			0.83					1.03		2.58				1
SNP_A-8332640	rs3802083	AHR	0.99					1.03	1.02		1.02			0.82		1.44	0.87		0.92	0.97		0.67	1.39							1.44	1.43	2.72	1
SNP_A-4243386	rs11740668	AHRR	1.04		1.01	1.12	1.12		0.63		1.07				0.77	0.92	1.23		0.83	0.99		0.76		0.93	0.81	1.08	1.02	0.91		2.43			1
SNP_A-4273740	rs4896623	AIG1	0.93					1.03		1.06			1.35										1.22	0.83					0.96	2		2.07	2
SNP_A-8490760	rs12205812	AIG1	1.03							1.03		1.33	1.27											0.65					0.95	2.2		0.97	1
SNP_A-8667047	rs9285499	AIG1		0.57																		1.36	1.44				0.76				2.09		1
SNP_A-2286416	rs11208609	AK3L1		0.91		2.11		0.93		1.13	1.09	0.94		1.41				0.71	0.57		0.98	0.96	1.06								1.39		1
SNP_A-2042127	rs6497117	AKAP13	0.92			2.01			0.91	1.04		1.17						0.99				1.07			0.97	1.17		1.19	1.01	1.02			1
SNP_A-2164163	rs338520	AKAP13				0.79	1.21	1.07		0.98	1.24		0.91		1.21	1.49	1.02				1.09			0.76				2.43		1.18	1.04		1
SNP_A-2239281	rs4842888	AKAP13	0.82						0.88			1.47				1.34		0.99				0.69	0.79		0.98	1		2.03	1.11		1.01		1
SNP_A-2301391	rs414374	AKAP13	0.99			2.64	1.57	0.73		0.89	0.68		1.31		1.28	1.02	0.72				1.21			0.93				1.28		0.99	1.12	0.89	1
SNP_A-8414301	rs10220820	AKAP13		0.95		2	1.37			1.85		0.7	1.47				1.53	0.95						0.79		0.86	0.92		0.85	1.16	1.2		1
SNP_A-1916950	rs7960207	AKAP3	1.39										2.91							0.97	0.68			0.65	0.88					0.66			1
SNP_A-2262075	rs6416316	AKAP3		0.66					1.08						0.96			1.38					2.69	1.37		0.94	1.09				0.72		1
SNP_A-8503331	rs2072355	AKAP3	1.7		0.78					1.09			2.12		0.85		1.04	1.24		0.99	1.21	1.65		0.72	1.23	0.98	1.31			0.81	1.73		1
SNP_A-1883094	rs41438249	AKAP6		0.92																2.5													1
SNP_A-2291163	rs8012632	AKAP6		1.19									1.44													2.16							1
SNP_A-8373878	rs1295912	AKAP6		1.44				1						1.21	1.67					2.03					1.09		0.75				0.87		1
SNP_A-8603172	rs3784179	AKAP6				3.56										1.08								0.9									1
SNP_A-8674960	rs10135562	AKAP6								0.68				0.74				1.14		2.72									1.1				1
SNP_A-2275956	rs3777473	AKAP7		0.96	0.75		1.27			1.98	1.78												0.99	0.92	0.84	1.43				0.63		3	1
SNP_A-8357140	rs11601244	NELL1												0.85	1.29								2.72	1.7			2.09						2
SNP_A-1894933	rs12529505	AKD2	0.59	0.81		2.37				1.14			0.97			0.64	1.07				0.91				0.75		0.64		1.09			0.88	1
SNP_A-4287159	rs7745469	AKD2		0.7			0.93				2.15	0.73					1.11		0.71										0.93				1
SNP_A-8525627	rs9400316	AKD2		0.99			0.66				1.19	1.21					0.99		2.24										1.03				1
SNP_A-2042087	rs4707385	AKIRIN2				2.13		0.79	1.44	0.68				0.83		0.64			1.09	1.17			1.16	0.93								1.25	1
SNP_A-2156603	rs17134531	AKR1C4										2.31										0.85					1.65				4.36		2
SNP_A-4291098	rs10927067	AKT3	0.99		1.05	1.06		1.32			1.04	1.03		0.85	0.98															2.43			1
SNP_A-8314427	rs4646568	ALDH1A2		1.04		1.01	1.06							2.13	1.93							0.85			0.82						0.43		1
SNP_A-8584926	rs1441815	ALDH1A2		1.28	0.99		0.54	1.46	2.44	2.41						1.21					0.86	1.02							1		0.98		2
SNP_A-4271975	rs6438976	ALDH1L1					2.16		1.22		1.53				1.36		3.12								1		1.83	0.93	1.23		1.01		2
SNP_A-2038052	rs10459204	ALDH1L2	0.87					0.73		2.14						1.45					1.4				1.21				0.87				1
SNP_A-2039203	rs12581638	ALDH1L2	0.98		1.03				1.01			1.57			2.29	2.28	0.87			1.33		1.21	1.01	0.95							0.75	1.28	2
SNP_A-2094730	rs7954946	ALDH1L2	0.83		1.29	1.54		0.97			0.81	0.81				1.61	1.03				1.26	2.42	1.28		0.93	1		1.38				0.78	1
SNP_A-1901979	rs3765311	ALDH5A1		1.17			1.13	1.22	1.03		0.99						1.3		1.82		1.23		0.97		1.06		1.12				2.14	1	1
SNP_A-1949189	rs1739775	NRG3								1.95											2.05												1
SNP_A-8311566	rs2391391	ALG14			0.79				0.97	1.05					2.3				0.97	0.94							1.09		0.53	1.18			1
SNP_A-2095400	rs968811	ALG6	0.71	1.15			0.87	0.87		1.34	0.71					1.01			2.17			0.96		1.18		0.73	1.36			1.05	1.08		1
SNP_A-8371665	rs9436670	ALG6	1.1					0.89		0.96	2.08			1.64			1.11		0.64			1.4				1.78					1.52	1.04	1
SNP_A-4268371	rs631318	ALG9			2.11			2.76								2.83						1.31							1.91	2.01			4
SNP_A-2254398	rs3923028	ALK					2.17			1.65																							1
SNP_A-8433544	rs6750887	ALK		1.29			1.33			1.9	1.98	1.94			1.51	1.69	1.82				1.5				2.02	2.5		1.43					2
SNP_A-8554508	rs2270353	ALK				0.87			2.1									0.8			1.24												1
SNP_A-8613404	rs6547926	ALK					2.25																										1
SNP_A-1947531	rs41416346	ALKBH8	1.11	1.55							1.23			2.08		0.65		1.03	1.2	1.33	1.17	0.82					1.24	1.4					1
SNP_A-2117597	rs490459	ALKBH8		0.82	1.19					1.67	1.02	2.27	0.93	0.87		0.82			1.08	1.21		1.08			1	1.09	1.31	0.9	1.21	1.45	1.76	2.42	2
SNP_A-4254911	rs636820	ALKBH8							2.29							1.57			1.2	1.17				1.12					0.92	1.28	1.7		1
SNP_A-8304618	rs652320	ALKBH8	0.99		1.26		2.49			2.81			0.73	0.84		2.51		0.95	0.8	0.86	0.92	0.65		0.61	0.84					1.07		1.51	3
SNP_A-8402598	rs16897948	PDE10A									2.53						1.18																1
SNP_A-8599000	rs533757	ALKBH8		0.87	0.8					2.5	1.4		0.9											1.26	1.44		1.32	1.1				2.22	2
SNP_A-4203130	rs6745560	ALMS1				0.98	0.96		1				0.96						0.91	0.85		1.19		1			2.86					1.55	1
SNP_A-4262030	rs11688718	ALMS1				1.24	1.06	1.17	1.46		1.08		0.9							1.12		0.86		0.9			0.98					2	1
SNP_A-8532839	rs6746971	ALMS1				2.18	1.28	0.96	0.94		1.69		0.9							1.14		1.09		1.24			0.89					0.98	1
SNP_A-8451241	rs934187	ALOX5											0.88		1.63									1.14				2		1.21			1
SNP_A-2027478	rs1859140	ALPK1									1.4						1.13				1.29							2.09	1.15	1.03			1
SNP_A-4249780	rs2125192	XYLT1					1.13	1.18	2.08						1.18			1.11												0.98			1
SNP_A-8659682	rs231252	ALPK1	0.84	1.01					1.7				1.35	1.45			0.7	1.17	1.05	0.98								1.3		1.05	0.9	2.49	1
SNP_A-4275479	rs1774817	C1orf168						3.4																									1
SNP_A-8703399	rs6812485	ALPK1	1.03	1										2.11	0.97		0.93	1.12		1.02			0.7										1
SNP_A-4277789	rs8087603	ALPK2					0.98		1.39	1.19		1.07		1.25	0.91	0.95		1.45	2.55			1.55		1.13	0.94				1.21			0.84	1
SNP_A-2118599	rs10127471	NBPF10	0.99			0.84	1.14		1.17									0.73	0.85			1.67		0.67			0.74		1.14	2.66			1
SNP_A-2253260	rs10203989	ALS2CR11												2.32																			1
SNP_A-8294624	rs3861063	ALX4									0.89				0.75				1.41								0.99					2.35	1
SNP_A-2013924	rs4753626	AMOTL1			1.1	1	0.82		1.69	1.23	2.48	1.49	0.9	2.02			0.74		0.97						1.15				3.02		0.56		3
SNP_A-8589144	rs4753623	AMOTL1												2.25											1.06								1
SNP_A-2007667	rs10840419	AMPD3	0.75	1.03					0.87	0.97				1.14	1.1		1.21	0.77	0.86	2.12			1.06				0.97		0.9				1
SNP_A-8348627	rs7107588	AMPD3	0.93	0.99				0.81	1.53					2.24					0.84	0.99											1.08		1
SNP_A-4275700	rs13231472	AMPH	0.86	1.14							0.99		1.3						0.98	0.87		1.31	2.23	0.89		0.98			1.41	0.86			1
SNP_A-2264611	rs4847151	AMY2A					1.39					2.12	1.08				1.38	1.16			2.38	0.74								1.6		0.62	2
SNP_A-8524030	rs6661612	AMY2A					0.74					0.62	0.94				1.86					2.3								1.88		2.42	2
SNP_A-1904903	rs17104890	ANGEL1				2.18					1.28		1.24			1.04	1.18		1.42		1.1	1.07							0.92	1.04		0.99	1
SNP_A-1994585	rs4077322	ANGPT1						1.08		0.82							0.85	1.02		1.04			1.05		1.11	2.14	0.88						1
SNP_A-8403235	rs4571710	ANGPT1	1.21			3.49					1.17						1.6				0.98	1.02			1.16		1.07			1.19		1.65	1
SNP_A-8338910	rs1375668	ANGPT2					1.23							0.71		1.47		2.62				1	0.8	0.8		1.24							1
SNP_A-2220311	rs515071	ANK1					2.21			1.52					1.41				1.46	1.45							1.44			1.75			1
SNP_A-8470460	rs4737004	ANK1				2.28					1.04		0.84	1.02								1.11	1.08			1.04	0.97					0.95	1
SNP_A-1871363	rs7683536	ANK2	0.88				0.87				0.92	1.15			3.06							0.61			1.28	0.97	1.1	0.9		1.27	1.08	1.71	1
SNP_A-1961323	rs313954	ANK2	0.92				1.31				1.28	1.1		0.85								0.91				1.24	1.27	1.51			1.38	2.13	1
SNP_A-1978552	rs1395114	ANK2		0.93	0.96	2.26	1.06	1.09		1.13			1.31	0.96	1.12	1.03		0.99			0.9	0.89			0.97	0.9		1.04		1.05	1.03		1
SNP_A-1978556	rs12500983	ANK2	1.08	0.93	1.01									1.39	2.05		1.43	1.14	0.89	0.95		0.98						1		1.08	0.99	0.98	1
SNP_A-2043443	rs41446652	ANK2	1					1.21					0.46					0.73							2.5								1
SNP_A-2066245	rs10213287	ANK2	1.12			1.09	0.89	0.99	2.24			0.91		1.38			1.21	0.98	1.17			0.94		1.04	1.12						1.36	0.65	1
SNP_A-2192917	rs313955	ANK2													1.06		1.31		0.94				1.35		1.26					1.33		2.47	1
SNP_A-2199781	rs29376	ANK2				2.02		1.18				0.77	0.85								0.88				1.38					0.81			1
SNP_A-2265373	rs17614543	ANK2					1.22					0.87		1.51	1.53						2.32											0.79	1
SNP_A-2266732	rs313956	ANK2													2.11																		1
SNP_A-4210458	rs1026975	ANK2		0.73			0.97				1.03		0.93				0.96					1.34		0.69	0.8			0.65	2.25	1.05	0.78	0.66	1
SNP_A-4296680	rs10020548	ANK2	0.8	0.9	0.81									1.11	2.03		1.43	0.97	0.79	0.85		1.15	0.91					1.09		1.8	0.98		1
SNP_A-8318300	rs12505416	ANK2	1.25					0.85					1.82	1.74			2.78	0.82			1.31	1.28		1.16	0.8			2.06		1.13	1.29	0.8	2
SNP_A-8351416	rs6826558	ANK2													2.97								1.04	0.7									1
SNP_A-8381955	rs7655703	ANK2	1	1.97					2.95	0.87	0.99		0.96		0.97	0.87		0.75		0.88	1.71	1.12	0.98	0.82		1.13							1
SNP_A-8494869	rs7660069	ANK2		1.03	0.9		1.15				1.08	0.98			1.22			1.11							1.47	1.02	1.05	1.26		1.21		2.38	1
SNP_A-8515961	rs6837705	ANK2					1.32				0.94	1.03			1.18										0.9	1.37	1.78	1.35		1.44		2.48	1
SNP_A-8537166	rs362498	ANK2		1.04		1.09				1.07	0.91				1.69			0.82	0.83			1.21		2.77	1.82			1.26				0.64	1
SNP_A-8546833	rs7682245	ANK2	0.93		0.98		0.82				2.21		0.67			0.91	1.54			1.09	0.95	1.55			1.47			1.54					1
SNP_A-8673611	rs1395113	ANK2		1.49	0.9		1.37	1.01		1.49		1.25	1.28	0.95	0.88	0.97		0.97	1.05	0.84	1.24					2.31					1.23	0.98	1
SNP_A-2139866	rs16914867	ANK3			1.07	2.73									1.84		1.17	0.86															1
SNP_A-2282864	rs2288359	ANK3			0.89					0.69	1.25			0.57			0.93					2.73	0.91										1
SNP_A-8289790	rs10994171	ANK3			0.85	0.94				0.65	1.16	0.93		1.19			2.14	0.89	1.17			1.02	0.82	1.41	1.17								1
SNP_A-8359253	rs10821746	ANK3							2.35			0.69		1.21		1.19		1.07	1.48	1.08					0.74				0.92				1
SNP_A-8537270	rs10821687	ANK3								0.68	1.05										0.94	2.24	0.92										1
SNP_A-1814503	rs31916	ANKH		0.74	0.63	2.58		0.91		0.73		0.89									1.01					1.09					1.32		1
SNP_A-8336113	rs572570	ANKMY2																														2.92	1
SNP_A-2206380	rs4797356	ANKRD12		0.94	0.87				0.96			1.04	1.14	1.06							0.95	1.19		1.35							1.24	2.25	1
SNP_A-1997297	rs7851025	ANKRD18A	0.74	0.68					2.49	2.23			1.09	2.69																		1.66	3
SNP_A-1844186	rs10887861	ANKRD22	0.98							1.12	1.25	1.51		1.93			1.41			0.66		0.9	1.56			2.36	0.82		0.76		0.76		1
SNP_A-1932556	rs1214563	ANKRD22														3.16				1.61													1
SNP_A-2248531	rs10764667	ANKRD26	0.87		1.28		0.68								0.75	1.22		1.02		1.02	0.78	0.97		0.92		1.59		2.81					1
SNP_A-1788097	rs259218	ANKRD27		1.15	1.03	1.05		0.86							0.83	1.02	1.16		1.03			2.22			0.93						1.07		1
SNP_A-2112596	rs259219	ANKRD27														0.95			0.84			2.21											1
SNP_A-4270301	rs2829841	JAM2		0.85	0.82		1.06					1.18	0.93	0.98						0.91	0.74				2.44	0.79	1.15		0.98			0.87	1
SNP_A-1938962	rs4834000	ANKRD50					0.93								1.03	1.64				1.2		1		0.87		0.83		2.19	1.09				1
SNP_A-8395286	rs7656458	ANKRD50		0.99			0.95	0.8		1.01	1.42		1.16		1.3		1.14			0.57				1.33	0.99				1.04		0.88	2.3	1
SNP_A-8662238	rs17008479	ANKRD50								1.68																						2.13	1
SNP_A-1937277	rs2395601	ANKS1A																				0.71		1.07			1.03	2.46	1.26				1
SNP_A-2239434	rs12173920	ANKS1A	1.23				1.01	1.34	1.9						2.02						1.27				1.13			1.2		0.73	1.18		1
SNP_A-2238506	rs6538945	ANKS1B											2.16																				1
SNP_A-4283209	rs11109659	ANKS1B						1.92			0.53								2.21					1.78									1
SNP_A-8382558	rs11109773	ANKS1B											2.31			1.31									0.75		0.87	0.86	0.74			0.9	1
SNP_A-8533629	rs12304343	ANKS1B						0.97		0.73	3.18			0.75			1.59			0.77				2.18	2.1						0.79	1	3
SNP_A-8395229	rs2509143	ANO1		1.3		0.75	1.33		1.18	1.59	1.1			2.29	1.34					1.01	1.05	0.96		1.15					1.1	0.82		1.13	1
SNP_A-4259395	rs821854	ANO4	3.28			0.76					0.82					1.36	1.58	1			2.49		1.3							1.24	1.28		2
SNP_A-2278256	rs11026484	ANO5		0.95	1.08			1.06		0.75					2.03				0.88		1.2		0.91							1.15			1
SNP_A-1815691	rs7965912	ANO6					0.94			2.61															1.21					1.26			1
SNP_A-8555050	rs872251	ANP32B		1.32				0.98				2.47			0.8	0.92		0.99					1.11						0.75			0.63	1
SNP_A-4285533	rs4255990	ANTXR1	1.04			0.72	1.32	2.2		1.05									1.31	1.37	1.16		0.9		1	0.97	1.12				1.11		1
SNP_A-8413607	rs7091141	ANUBL1																						2.82									1
SNP_A-8485093	rs17157941	ANUBL1									0.99													2.14									1
SNP_A-1996823	rs2795114	ANXA1	0.75		0.98	1.09		0.87		0.84			1.58			1.12		0.92										2.06			1.22		1
SNP_A-8490241	rs2248103	ANXA10			1.11	0.94			1.35		2.2			1.13		1.43	0.57				1.32		1	0.89		0.7		2.61		1.21	1.89	2.19	3
SNP_A-1944785	rs6533804	ANXA3														0.62								2.13									1
SNP_A-1983997	rs883887	ANXA6		1.17	2.52		1.12		1.62			0.86	0.88	0.88								0.91	0.97			0.91	0.96	1.11	1.2		0.98		1
SNP_A-2055036	rs3779222	AOAH				2.09	1.39	1.24			1.17	1.13			1.79							0.85			1.31			0.83					1
SNP_A-2260174	rs2036338	AP1G1								1.03				2.16		0.77	0.69	1.7	0.93		1.67		1.1	0.96		0.99				1.44			1
SNP_A-8638402	rs1045000	AP1GBP1							1.37	1.01		1.21			1.52	0.92						0.92	0.92				0.97	0.91			2.7		1
SNP_A-8693194	rs1048701	AP1GBP1	0.91					1.66				1.03	0.69				1.07										0.95	0.96		2.22		1.19	1
SNP_A-8431264	rs7599342	AP1S3	1.28				1.24	1.11	2.21	0.91	1.13	1.03	0.76		0.86	0.65	1.17	1.15		0.85		1.1	0.9	1.6			0.85				1.07		1
SNP_A-1874393	rs1552647	AP3B1						1.13	1.13				1.19			0.89		1.27				0.93		1.14						2.13	0.86		1
SNP_A-1860918	rs16953045	AP4E1			0.69			1.23					0.79	1	2.95			1.2		0.7									1.03	2.52		1.07	2
SNP_A-4225718	rs11831003	APAF1		0.92					1.01	1			1.23	0.94	1.1						1.15		1.03		1.03				2.18	1.39			1
SNP_A-8299268	rs13288998	APBA1					0.77	0.95					0.87							1.96				3.46		1.4	0.98	0.71	1.36		0.72		1
SNP_A-8325040	rs11139511	APBA1	1.7			1.67		1.78	0.62						1.07		2.1					0.62			1.17						0.61		1
SNP_A-2288198	rs937050	APBA2	0.8	0.76	0.9		0.79	0.81	0.98	0.88	0.97	2.11	0.92				1.27	1.03	1.16		1.03		0.89	1.28	1.01		0.95	1.06	0.82	0.86		0.87	1
SNP_A-2227333	rs1775229	APBB1IP				1.08						1.62	1.12	1.21		1.35	1.36	0.98		1.06	1.14	1.29								2.29	1.16	2.26	2
SNP_A-1881303	rs7659645	APBB2					2.43			0.66														1.46	0.61	1.28						0.84	1
SNP_A-2219285	rs16852924	APBB2			1.11			1.04								1.14	1.52	1.23	1.4			1.01								2.29			1
SNP_A-8540776	rs7685182	APBB2	1.18			3.76		1.06		1.38					1.81		1.32	0.88			1.12								1.37	1.87		1.2	1
SNP_A-8621199	rs10517554	APBB2														2.12								1.03									1
SNP_A-8657538	rs1032984	APBB2				1.26	2.65		3.11	1.74		3.12			2.9			1.74									1.44			1.06			4
SNP_A-2110986	rs11241182	APC								1.69	2.4	1.48	0.95			0.96					1.04		0.8	1.24		1.12	0.88	0.93	1.76		0.83	1.12	1
SNP_A-1822505	rs6015286	APCDD1L			0.92	0.85		1.04				1.22	1.84	1.71				1.51	2.13	0.85	0.98					1.26		1.1	0.67				1
SNP_A-8317638	rs6026308	APCDD1L		0.84				0.77			2.34		1.57	1.56	1.02		1.63						1.05			1.31			1.4			1.03	1
SNP_A-8706541	rs745338	APH1B		1.07		0.87	0.92		0.81				1.28					0.94	0.86	0.85	1.15		0.64		1.12	1.05	0.84			0.85		2.5	1
SNP_A-2009744	rs2986427	APIP	1.03	1.03			0.75		1.08		1.04	0.87			1.09		1.19	1.24		1.39						0.84		1.28	1.08	2.47	0.64		1
SNP_A-2009746	rs1326940	APIP	1.05	0.94			0.61		0.82		0.82	0.73			0.84		1.02	1.06		1.2						1.25		1.15	1.19	2.92	0.81		1
SNP_A-2009751	rs984690	APIP		1.29			0.92		0.91		0.79	3.27						1.17		0.83					0.94			1.11	0.95	0.86	0.93		1
SNP_A-4214913	rs1326941	APIP	0.92	1.05			0.68		1.11		0.93	0.87			0.95		1	1.31		1.21						0.97		1.01	1.56	2.17	0.73		1
SNP_A-8350732	rs6488556	APOLD1																		2.28											1.46		1
SNP_A-2017016	rs9305274	APP	0.58		1.03																2.05						1.12					1.3	1
SNP_A-8340878	rs7279119	APP		0.66	1						2.44		1.14	1.1		1.07	1.04		1.07	1.03	0.93				1.07	0.98	0.84	1	0.86		1.08		1
SNP_A-8341199	rs2830087	APP	0.99		0.77	2.51				0.97	0.73	1.19	0.69	1.09		1.34			1.11	1.25	0.94			0.98	0.88		1.1						1
SNP_A-2307036	rs1196780	APPL2				2.35																	1.36										1
SNP_A-4301578	rs10518966	AQP9	1.04		1.48			0.68				0.94	1.53	1.06		1.19		0.81			2.11	1.06					1.01						1
SNP_A-8488032	rs8042624	AQP9	1.1	0.84	0.94	1.49		1.67				0.89	1.32	2.16		1.44		0.83			1.76	0.87					1.23					1.4	1
SNP_A-8335665	rs6535872	ARFIP1		0.78									0.89						0.7		1.15	1.06							2.5				1
SNP_A-2129546	rs954547	LOC646982							1.2																	1.18	0.81			2.11			1
SNP_A-2037861	rs2246715	ARHGAP12	1.01				1.29	2.31		0.99	0.96					1.35			0.96	1.19		1.6					1.19	1.37					1
SNP_A-1853812	rs12992706	ARHGAP15	0.73		1.09						1.03	1.73			1.74				0.96	2		0.82	1.2						1.49	0.95			1
SNP_A-2006759	rs4662343	ARHGAP15	0.97						2.02		1.35	0.74					1.18	1.16	0.74								0.94	1.16					1
SNP_A-2031380	rs7597991	ARHGAP15						0.98					2.16																1.19		1.45		1
SNP_A-2132582	rs16822400	ARHGAP15	1.04	1.14	1.07	1.04			1.01	2.57		0.94	0.74				1.12					0.84	0.91	1.04		1.13		0.86			1.23	1.03	1
SNP_A-2261180	rs4662339	ARHGAP15	1.07		1.12						1.04	0.97			1.12				1.03	1		0.98	1.07						2.02	1.77			1
SNP_A-8449891	rs11036815	OR51B2		0.99	0.94		1.08		2.79			1.51		2.91			0.66		1.14				1		0.96		1.36	1.55		1.01			2
SNP_A-8356362	rs16822700	ARHGAP15			1.23			1.01	1.56									1.03		1.17		1.57	1.3					2.42	1.56	1.25			1
SNP_A-8406994	rs2678290	ARHGAP15	1.05		0.95	2.27	1	1.15			0.96	1.09	0.93		1.1			0.94		1.3	1.22	1.06	0.92	1.05	1.05	1.03		1.03					1
SNP_A-2280963	rs8051830	ARHGAP17		1.39	0.99		1.25		2.26			1.29										0.82	1.02		0.59		0.78						1
SNP_A-2208930	rs17383351	ARHGAP18		0.93																	1.08							2.27					1
SNP_A-8345679	rs9375651	ARHGAP18				1.67										1.02	2.22					1.16		1.32	0.98	1.13	1.13	0.9		0.97		1.56	1
SNP_A-8383293	rs326959	ARHGAP20	1.13				0.97	1.32	0.81	1.32	0.95	1.16	1.07	1.77	0.76			0.87	0.88		1.06		1.97		1.16		0.97		2.93	0.53	1.15		1
SNP_A-8567290	rs3930078	ARHGAP20	1.03	1.06						0.89												2.49											1
SNP_A-1868117	rs7070456	ARHGAP21																					0.91					2.26					1
SNP_A-1901023	rs1075809	ARHGAP22					1.09										3.93					1.17											1
SNP_A-8568703	rs4838616	ARHGAP22										1.56			2.55																		1
SNP_A-1876206	rs11735639	ARHGAP24					0.76		1.32					1.71									0.97	2.75			1.1		0.92				1
SNP_A-2060937	rs17387344	ARHGAP24			0.69				0.85					0.59							0.71				2.54	0.88	0.97		1.07		1.1		1
SNP_A-2214715	rs10020489	ARHGAP24			0.81				1.05					1.17							0.51				2.64	0.73	1.33		1.03		1.65		1
SNP_A-8360085	rs2128100	ARHGAP24			1.11				2.46					0.73							1.42				2.41						2.32		3
SNP_A-8582423	rs11097059	ARHGAP24			1.22									2.38											0.9								1
SNP_A-8613120	rs12503243	ARHGAP24						1.25		0.86		1.16	1.08	0.59	1.09		0.83	1.22					1.28	0.71			0.73	1.01	2.24	0.57	0.52		1
SNP_A-8635871	rs931195	ARHGAP24					1.35		0.77			0.95	1.07	0.47	0.8		1.18						0.91	1.2		0.98	1.04	2.28	1.46				1
SNP_A-8640487	rs13111293	ARHGAP24														0.69								1.58		1.07	0.71	2.59	1.16				1
SNP_A-8662182	rs7682971	ARHGAP24				1.09	0.49					1.87		1.81	1.36		2.22						0.91				1.98	0.61					1
SNP_A-8662190	rs17011217	ARHGAP24							2.05						0.95		1.19													0.92			1
SNP_A-1802512	rs4627611	ARHGAP25											1.2									2.48						1.22					1
SNP_A-4220837	rs7608597	ARHGAP25	1.07				1.65						0.92	1.55	1.4		1.43		1.12	1							1.27	1.13				2.3	1
SNP_A-8316153	rs4854516	ARHGAP25		1.42			2.06					0.74				1.3						1.54	1.59									1	1
SNP_A-8328500	rs12232891	ARHGAP25					0.81						0.88									2.51											1
SNP_A-8400687	rs6720182	ARHGAP25	1.02				0.44						1.04	0.8	0.82				0.89	0.86							0.75					2.24	1
SNP_A-8638641	rs3969865	ARHGAP25					0.74				1.37		0.81									2.69											1
SNP_A-1856164	rs37185	ARHGAP26		0.87		1.05		0.66	0.59		0.96	1.44						0.88	1.11		0.85		0.84	0.8				0.92		2.63		0.75	1
SNP_A-1896465	rs28304	ARHGAP26							1.72			2.37						0.96					0.89										1
SNP_A-1983775	rs173750	ARHGAP26	1.08	0.8					2.23	1.01		1.34		0.68		1.1	0.8	0.87		1.02		0.83	0.8	1.02	0.83								1
SNP_A-8640146	rs245832	ARHGAP26		1.06	0.6		0.54	0.62			1.25	0.61		1.01	0.93	0.76			0.91	0.53	0.89			0.56	0.91		1	2.07			1.13	0.64	1
SNP_A-8665966	rs3756375	ARHGAP26	1.29					1.74	1.45	2.37	0.77	0.65	1.38				2.34		1.09			1.08		1.31	1.13	0.81				1.87			2
SNP_A-2109666	rs6657063	ARHGAP29			0.84							2.88	1.08				1.01	1.15								0.94		1.92					1
SNP_A-4226052	rs1048866	ARHGAP29		0.97	1.25						1.09	2.22			1.26		1.11	2.1	1.1	1.19			1.21	0.81		0.9	0.97		2.12				3
SNP_A-8466024	rs7051324	ARHGAP6						1.17					0.83												1	1.16		1.9	1.46	0.53	2.06		1
SNP_A-8359839	rs10492145	ARHGDIB				1.74	2.39	1.39										1.4			1.17	1.4					1.09					1.37	1
SNP_A-4241565	rs3766309	ARHGEF10L		1.33						3.26							2.89		1.53													1.34	2
SNP_A-1780660	rs1007604	ARHGEF11																			2.57					0.81							1
SNP_A-2272815	rs1006168	ARHGEF11			1.08			0.48	2.51			0.89	0.57		1.8		0.95		0.86	0.72	1.66					0.88							1
SNP_A-4208776	rs12136088	ARHGEF11			1.36			1.06	1.29	2.56		0.97	1.12		1.51		1.15		1.23	0.88	0.99		1.36			1.42				1.74			1
SNP_A-4208777	rs3737599	ARHGEF11				1.05			1.63										0.68				1.32			2.11							1
SNP_A-8521454	rs11806313	ARHGEF11	1.26		0.77	1.79		0.85	1.35						2.3		1.23		1.05				0.87			1.26							1
SNP_A-8348103	rs17123861	ARHGEF12	0.91	0.9			1.37	0.93							0.92	0.82	1.24	0.9		1.1						2.02	1.07						1
SNP_A-1972706	rs17288908	ARHGEF3	0.87				1.14	1.27				1.06	1.05		1.21	0.98	1.37	1.32	1.05	0.61	1.02	0.96			1.15					0.82		2.02	1
SNP_A-2105079	rs9311623	ARHGEF3						5.13	2.66		1.81				2.52		2.36				2.01											1.47	5
SNP_A-2222185	rs11130549	ARHGEF3																								0.99				1.68	2.03		1
SNP_A-8305734	rs6801499	ARHGEF3			1.38			0.78			0.86			1.49	2.03	1.01	1.13					0.85	0.95		1.45	1.16			1.38				1
SNP_A-8446275	rs9825091	ARHGEF3	0.97		1.02	1.53		0.96		1.23		1.02	0.94		0.9	0.81		0.99	1.01			0.79			2.22	1.26		1.03			1.18		1
SNP_A-1856906	rs6903671	ARID1B	0.79									0.84			1.06		0.82														1.1	2.33	1
SNP_A-2125728	rs9384510	ARID1B			3.35	1.02							0.86				1		1.22	0.89		1.45	1.05		1.06	1.02	0.94		1.11	1.44	0.98		1
SNP_A-2142298	rs9384524	ARID1B		1.06		1.11				0.96		1.12	1.08	1		1.13	1.01		1.12	2.28			1.1			0.9			1.06	1.02	0.94	1.07	1
SNP_A-8549937	rs287873	ARID1B	0.88		1.18	2.29						1.36			1		1.39		1.12	1.19		1.08	0.98		1.04	1.11	0.96		1.06			1.16	1
SNP_A-8669253	rs17087934	ARID1B		0.78	0.66				0.77	1.19					2.35				1.42	1.31					0.74	0.94							1
SNP_A-8513550	rs10459601	ARID3B							2.22	1.37												1.08											1
SNP_A-4284773	rs12117563	ARID4B	1.48		0.57					1.22	0.96	1.36	1.15		0.99	1.03								1.01	0.94				2.24	1			1
SNP_A-1888896	rs6479778	ARID5B		1.61	1.27	2.18							1.44		1.09	0.85	1.68						1.07	1.09	0.83				0.96				1
SNP_A-2087303	rs2893881	ARID5B			0.94	0.78							1.13			1.74							0.86	0.96	2.6				1.01				1
SNP_A-2142145	rs10994982	ARID5B		0.96	1.35		1.31	0.94	1.49			1.26	0.67	0.94	0.76	1.03	1	1.34	1.08	1.01	1.02				1.14	0.85	0.91		1.04			2.15	1
SNP_A-1781302	rs35941	ARL15		0.85		1.05				2.01		1.13		1.24		0.69			1.11	1.23	1.07		0.98					0.89	1.46		1		1
SNP_A-1858417	rs13153747	ARL15					0.97											1		0.89							0.94		2.43			2.11	2
SNP_A-1888208	rs35955	ARL15	0.88	0.99			0.78	0.92		1.11		2.53	0.84	1.22	1.27		1.39	1.01	1.12			1.34			1.15				0.83	1.02			1
SNP_A-1981562	rs1694062	ARL15	1.09	1.07			0.97		1.29		2.21			0.95			0.94					0.56	0.94		0.81	1.42		1.36					1
SNP_A-2026101	rs156830	ARL15	0.99			2.06			0.84	1.01								1				0.72	1.21				1.06	1.37	1.01	0.88			1
SNP_A-2161310	rs16882239	ARL15					2.09											1.05		2.01							1.12		1.25			1.88	2
SNP_A-4216670	rs279744	ARL15	0.83			2.42			1.01	0.72								1.03				1.27	1.07				1.02	2.5	0.92	0.95			2
SNP_A-4250477	rs16881958	ARL15	0.67	0.93					1.4		0.99			0.71	1.17	0.52	0.97					1.83			2.4	1.65	0.89	2.34		1.22			2
SNP_A-4264889	rs278065	ARL15	1.13			2.49			0.97	1.62								1				0.95	1.37				0.75	1.9	0.88	1.62			1
SNP_A-8295473	rs40145	ARL15	0.92	1.05		1.14	1.15	1.07		1.35		1.3	1	1.02	1.14		0.87	1.09	0.92			1.01			1.31				1.01	1.58	1.79	2.05	1
SNP_A-8396178	rs156443	ARL15	1.11	1.03					1.45		1.1			0.66			0.82					0.79								2.27			1
SNP_A-8437384	rs279743	ARL15	1.02			2.01			1.04	1.26								0.9				1.07	1.05				1.12	1.99	1.11	1.05			1
SNP_A-8439819	rs4865808	ARL15	0.68	0.68	0.72	2.17	0.73	0.92	0.79	0.69	1.32	1.06	0.6	0.64	0.87	0.59	0.86	1.02	0.72	1.16	0.93	1.34	1.05	0.88	1.7	1.09	1.02	1.07	1.05	1.44	0.8	0.72	1
SNP_A-8469049	rs4865809	ARL15	0.77	0.67	0.92	2.03	0.77	0.64	1.14	0.81	0.86	0.94	0.92	0.8	1.02	0.56	1.04	1.08	0.58	1.09	0.71	1	1.15	1.11	1.17	1.2	1.09	1.31	0.9	0.94	0.68	0.82	1
SNP_A-8692698	rs26885	ARL15				0.93			1.06			1.02	0.81				1.18	0.86	0.98	0.82							0.92		2.22		0.93		1
SNP_A-8439072	rs10897660	ARL6IP1							2.34		1.32		1.65	2.73									1.09	1.08	1.16								2
SNP_A-2156448	rs3731776	ARMC9	1.08		1.15					0.76	2.07						1.09					0.97	1.06	1.06					1.05			0.95	1
SNP_A-8576687	rs17625570	ARMC9			0.91		0.92				2.07				1.09	1.1	1.59	0.94				1.18	0.92				1.15					1.18	1
SNP_A-8301172	rs2256355	ARNT			1.21	2.04				0.99	0.91				1.23	1.04		1.11	0.88		1.02		0.89		1.01	1.01	0.87			1.05		0.8	1
SNP_A-2141170	rs4414197	ARNTL	0.96	0.82		2.29	1.23			1.32	1.44	0.98				1.08		0.77						1.67	0.99	0.81		1.37	1.31			1.07	1
SNP_A-2235037	rs10766073	ARNTL	0.94	1.13		2.1	1.04				1.11	1.39						1.09						1.15	0.95	1.14		0.8	0.93			1.05	1
SNP_A-8481973	rs12290622	ARNTL	0.85	1.01		2.1	1.13			1.01	0.91	0.9				1.06		1.37						1.36	1.23	1.16		0.96	1.36			0.9	1
SNP_A-8342855	rs1792624	ARPC3	0.9			1.09					3.42									1.23		1.26			1.58					0.68	0.74	2.13	2
SNP_A-8342856	rs10831169	ARPC3			1.08			1.23	1.11		1.42	1.06						1.01	0.79	0.95	0.86	2.15			1.04	1.16	0.75			1.56		1.6	1
SNP_A-1951396	rs10942869	ARSB	0.99		0.87	1.38			1.52	1.05		0.81			1.02							1.01	0.96	0.95		1.04		1.26				2.09	1
SNP_A-8295435	rs2919650	ARSB	0.96		1.03	1.83		0.67	1.04	2.28		0.84			1.48				1.39				0.83	1.27	1.18				1.53			2.33	2
SNP_A-8346490	rs12658000	ARSB						1.39	1.06	2.37	0.9			1.04	1.56	0.92		0.96		1					1.16					1.08		0.9	1
SNP_A-1884377	rs17677317	ARSJ									1.17																			4.14			1
SNP_A-4220097	rs11729278	ARSJ	3.3		2.01		0.61	1.02			1.42							2.35									0.63			4.12			4
SNP_A-8500818	rs9995339	ARSJ	2.46		0.77						0.71																0.96						1
SNP_A-1808120	rs4256246	ART3	0.96		1.05		1.31	1.04	2.55		1.02	1.12		0.88			0.94	0.87	1.19		1.19	0.94			0.92	0.92	0.92		1.26			0.92	1
SNP_A-1816785	rs4339237	ART3				1.48	1.09		1.11								1.06				1.1	0.92										2.04	1
SNP_A-4246996	rs11056202	ART4						0.86								1.04	1.45				0.86		0.86									2.43	1
SNP_A-2296643	rs7825215	ASAH1		0.98	1.14			1.24	2.2		1.34	1.01							1.33									0.74		2.02		0.75	2
SNP_A-4206906	rs7824280	ASAH1			1.1			1.18	2.97									1.09												1.79			1
SNP_A-8417796	rs4935829	ASAM																						1.01						1.4	2.69		1
SNP_A-1789479	rs6470814	ASAP1	0.92	1.12		1.37		0.95			2	0.96			1.53		1.18	1.01			1.05	1.01					1.1	1.26	1.05	1.36			1
SNP_A-1947877	rs16904239	ASAP1	0.9	1.09		2.46		0.98				1.05			1.92		0.95	1.01			1.03	1.07					1.08	1.1	1.09	1.17			1
SNP_A-2124104	rs1469286	ASAP1	1.21	0.75		1.77		0.95				1.09			1.23		1.16				1.36	2.15					0.95	1.11	0.77	1.6			1
SNP_A-4240626	rs518873	ASB1	1.33	1.12				1.67					1.05		1.42	1.33	1.75	1.06	1.33	2.23	1.23	1.09	0.66			1.29		0.97	1.05		0.85		1
SNP_A-1963319	rs3770393	ASB3				2.9	0.95			1.35	1.08			2.17		0.77	0.8	0.96					2.19		1.32	1.28			1.94	1.53			3
SNP_A-8364261	rs10268588	ASB4		1.07	1.04	1.47	1.17					1		2.37					0.94				1.25		0.91		1.08		0.94	1.41			1
SNP_A-4271342	rs5752968	ASCC2			1.25					2.19	1.3									0.75								1.01		1.36			1
SNP_A-4202311	rs2275957	ASH2L											0.89		1.04	1.02					1	0.89	0.88		2.27					1.4	1.31		1
SNP_A-2214986	rs2237289	ASNS						1.08		0.78					0.77				0.93	0.96					0.84					2.02		0.8	1
SNP_A-8433582	rs7781469	ASNS		0.92		1.2					1.15	1.26		0.73		1.15	1.18	1.02	1.11	1.22				2.15				0.86		0.92	0.96	1.3	1
SNP_A-8706649	rs11136217	ASNS	1.18		1.24			1.17	1.12		0.73					2.04	1.49	1.24	1.48			1.02			1.15	0.79	1.42			1.05	0.89	1.32	1
SNP_A-2251915	rs6984604	ASPH			0.61						2.17		1.12			0.62	0.68	0.84	1.44				0.77						0.88		1.54		1
SNP_A-8698932	rs10095162	ASPH	1.09				0.92			0.93	3.3		1.04										0.97				0.81	1.16			1.02		1
SNP_A-4273838	rs1000815	ASPHD2	1.44	0.91			1.2			2.27			1.52	1.08				0.9					1.1			1.02	0.95		0.95				1
SNP_A-8704524	rs3087933	ASPRV1		1.19		0.68	1.06	1.46		1.94			1.58	2.17	1.46				1.85	1.49	0.8					0.89							1
SNP_A-8287030	rs4281490	ASRGL1							0.94											0.8		0.94		2.78		0.85				1.11	0.95		1
SNP_A-8430495	rs666174	ASS1	1.77	1.04			1.19			1.46	1.34		1.09	1.26	0.75	2.05		1.07			1.33						1.11	0.95			0.64		1
SNP_A-8336638	rs2969490	ASTL						0.99	1.05	0.79	2.39			0.98			1.03		1.18	1.3	1.04				0.95	0.83	1.02	0.99	1.08			0.78	1
SNP_A-1854822	rs10983252	ASTN2		0.97																	2.25		0.79										1
SNP_A-1901304	rs16933758	ASTN2				0.77				1	1.32										2.39		1.47			1.05					0.7		1
SNP_A-2050238	rs1413410	ASTN2	1.12	0.55	0.73		1.27						2.19																	1.07			1
SNP_A-2242674	rs10983233	ASTN2	0.71		1.07				2.13				0.94				0.93	1.42	0.87	0.88		0.94			0.24		1.06		1.03	0.51		0.59	1
SNP_A-2257603	rs10983319	ASTN2				1.93				2.49		0.94		2.2				0.63	0.92	0.61	1.88	1.16	0.87			0.67				1.09	1.6	1.29	2
SNP_A-4213633	rs10733619	ASTN2		0.97	1.28	0.95	0.91	1.15		0.92			0.66		0.88	1.57	0.87						1.91		2.3	0.66	1.16	1.48	0.82	2.19	2.27		3
SNP_A-4258075	rs1596101	ASTN2				0.62				1.14		2.26		1.47		1.48		0.66	1	0.59	0.59	1.58	1.73			1.54				0.73		0.74	1
SNP_A-4267703	rs10491574	ASTN2						0.78					0.65											4.13					1				1
SNP_A-4267704	rs2026586	ASTN2																						2.79					0.97				1
SNP_A-8284836	rs10732383	ASTN2		0.95	1.26		1.08	1.8					0.48			1.04	0.95						2.88		1.3	0.83	1.19	1.64	1.02	2.63	2.24		3
SNP_A-8348999	rs1885242	ASTN2	0.91		1.08	0.83			1.23	0.97	1.35					2.39	1.16	1.23		0.88	1.1	0.88	1.65			0.95				1.09	1.26	1.48	1
SNP_A-8349614	rs10732384	ASTN2		1			0.98		1.67				0.47			1.71	1.39						1.9		1.44	0.79	1.32	0.96	0.85	2.65	2.61		2
SNP_A-8512996	rs2150197	ASTN2	0.97		0.94	1.03		1.46		1.06		1.4	1.24		0.78			0.98	1.02		0.92		0.78	0.98	0.81		0.95		0.89		0.73	2.13	1
SNP_A-8530425	rs2150198	ASTN2	1.13					1.08				1.45	0.77											0.8			0.85		0.79			2.78	1
SNP_A-8632267	rs10983159	ASTN2							2.19				0.69												1.04		0.87						1
SNP_A-8697559	rs10759873	ASTN2		0.97	0.95		1.02	0.83			1.33		2.13	1.4			1.39	0.46				1.01		0.94			1.28		1.04		1.31		1
SNP_A-2219575	rs10180842	ASXL2														1.09									2.53			1.34					1
SNP_A-2143083	rs7564732	ATAD2B							1.86																1.22		0.98				2.03	1.61	1
SNP_A-1842545	rs4656334	ATF6	0.77	0.95						1.14		1.57			0.95	1.1	1.38			1.08		1.84	1.2		1.03			0.98		1.9	2.54		1
SNP_A-2240338	rs2341469	ATF6	0.87	1.22						1.61		1.31			2.1	1.89	0.87					1.03	1.35		0.79			1.29					1
SNP_A-2190005	rs7970587	ATF7IP		1.34	1.72	0.93	0.87	1.05	1.02	1.41	0.83			1.82						1.07	1.73					1.09	1.28				1.11	2.08	1
SNP_A-8361100	rs10845989	ATF7IP		1.16	0.91		0.85	1.1	0.96		1.13			0.76												1.21	1.43		1.5		1.69	2.04	1
SNP_A-4274297	rs5973843	ATG4A																										2.51					1
SNP_A-1924737	rs10159426	ATG4C	1				0.96				1.03	1.04		2.71		1.07		0.89			1.01	1.49		1.18	1.26					1.96	1.13	1.02	1
SNP_A-4248733	rs501804	ATG5					2.95	1.18	0.97	0.87			1.25				0.8			1.17		1	0.65	1.43		0.74		1.19	1.02			1.45	1
SNP_A-8360336	rs2763219	ATG5	0.73	0.87		0.8					1.51			1.3	1.72			2.2			1.46			0.82	1							1.49	1
SNP_A-2250805	rs2356456	ATL1	0.97				1.17				1.54						0.88	0.66						0.9			1.07		1.46		2		1
SNP_A-4300318	rs17667563	ATP10A						1.41		1.44		1.51	2.07			1.28			0.89	1.25		0.51	0.91						1.33	1.31	1.24		1
SNP_A-1863476	rs10077637	ATP10B							2.02																				1.08				1
SNP_A-4265366	rs2963194	ATP10B					2.21																										1
SNP_A-8352272	rs6866584	ATP10B										2.18						0.71	1.06							1.01							1
SNP_A-8603633	rs6813123	ATP10D	0.83		0.84	2.22	1.54		1.83				0.54			0.84		0.93	1.05	0.86	0.69						0.78			1.59			1
SNP_A-2190408	rs521829	ATP11B			1.05	0.81		1.34		1.94					1.39		2.34		0.85	2.14	1.62	1.32		1.36		2.14	1.46	2.03	2.54				5
SNP_A-2194236	rs2485732	ATP11C		0.69									0.85								1.02	1.12						2		0.82	0.47		1
SNP_A-8573859	rs17281969	ATP11C		0.96									0.99								0.97	1.12						0.75		1.46	2.28		1
SNP_A-8590977	rs12688450	ATP11C		0.6									0.95								0.8	2.71						1.05		0.87	0.96		1
SNP_A-1833575	rs6763501	ATP13A4			1.4			1.18	2.13	0.92		1.71			0.43	0.95		0.99			0.86		0.96					1.34	0.97			1.23	1
SNP_A-2172176	rs6764121	ATP13A4			1.13			0.79	1.98	0.92		1.14				1.31					1.66		0.99				0.9		2.76				1
SNP_A-2199615	rs13077551	ATP13A4			0.87			0.92									2.19				0.98			0.92								1.26	1
SNP_A-8354639	rs3796181	ATP13A4						1.22		2.09	2.42				0.95		1.33	0.91	0.79	0.73			1.14	1.01		0.82	1.24		1.22	1			2
SNP_A-2046199	rs7644587	ATP13A5										0.79								2.37			1.06		0.98					1.12			1
SNP_A-8447182	rs26801	ATP2B2				0.98		1.01		1.02		2.09				1.1				0.85	0.99	1			0.96	0.77					0.87		1
SNP_A-8584502	rs27667	ATP2B2										3.94	0.95																				1
SNP_A-1788095	rs4600103	ATP2B4		0.94	0.85			1.45	1.51	1.21		1.04	1.56	1.61		1.45	2.04		1.12	0.93		1.35	1.89					1.22		0.98			1
SNP_A-2300284	rs2578187	ATP5A1		0.8	0.74		1.86			1.86	0.88	0.55	1.4			1.94	1.85		1.94	1.45	2.03	0.74		1.26			1.23		1.51	1.94	1.37		1
SNP_A-2018350	rs2834297	ATP5O		1	0.94	3.06			1.11	1.21				1		0.76			1.12			0.93				1.09		0.98	0.95	1.24			1
SNP_A-8578604	rs2834300	ATP5O	1.02			2.06	0.87		0.92		1.19	0.81		1.06		0.71	1.04		1.03			1	1.12					1.12					1
SNP_A-2221517	rs7301641	ATP6V0A2													2.07																		1
SNP_A-8311253	rs3823493	ATP6V0A4		0.62							0.94								1.24			2.04		1.28			1.45			0.93			1
SNP_A-8397169	rs6034305	MACROD2	1.28				1.21					2.51											1.72										1
SNP_A-1872440	rs4383601	SYNPO2								3.59	0.7						0.39															3.62	2
SNP_A-8383967	rs16870033	ATP6V1C1					1.03				1.36		0.83																	2.06		0.8	1
SNP_A-2044337	rs3735833	ATP6V1H	1.09				1.03	1.01								1.13								2.11						1.16			1
SNP_A-2133954	rs1552148	ATP6V1H		1	1.11	2.18	0.9		0.93			0.94	0.9	1		1.02			0.97	1	1.04	0.89			1.02	1.19		1.44		1			1
SNP_A-4232052	rs9535822	ATP7B											2.69														0.88						1
SNP_A-8390320	rs9535812	ATP7B		2.18		1.03		0.77				0.61		1.23	1.31		1.91	1.4	0.96		1.05	0.52	1.06	1.14	0.95		0.71			0.77		1.89	1
SNP_A-4218717	rs12510610	ATP8A1	0.92		1.15	2.03			1.48			0.97	0.99	1.17	1.26						1.29				0.97			1.14	1.22	2.11			2
SNP_A-2310155	rs192795	ATP8A2		0.94				1.07			1.39				2.31							1.02		1.23	1			1.41	1.07	1.26	1.07	1.33	1
SNP_A-8534102	rs3132352	ATP8A2		1.01							1.75						3.58		1.71		2.22	0.9			1.12				1.05		0.59	0.97	2
SNP_A-8677183	rs11842112	ATP8A2	1.07	1.32	1.2		2.05					1.63	1.18								1.25	1.21		1.47							1.31	1.35	1
SNP_A-8426886	rs12594650	ATP8B4		1.23				1.54	1.03		0.99	0.98	2.27		1.14			1.21	1.85			0.85		1.02			1.18	1.05		1.32			1
SNP_A-1914790	rs4799034	ATP9B		1.17	0.76		1.95		0.95		1.11		0.9		1.13	0.87		0.97	0.7				1.02		0.98						2.33	1.08	1
SNP_A-1939514	rs4799020	ATP9B	0.99	0.72	1.02	2.09	0.99		1.22	0.95	1.14		0.67		1.06			1.33	0.87				1.08	1.56	1.35						1.13	1.01	1
SNP_A-8418766	rs11662839	ATP9B	0.91		1.13	0.89	0.84		1.02	2.78	1.15		1.12		1.6	0.92		0.93	0.99				1.05		0.92						1.05	1.01	1
SNP_A-2135031	rs16961056	ATPBD4				2.9													1.05										1.11				1
SNP_A-8447552	rs11854288	ATPBD4	1.02	0.99	0.98	3.03		0.96		1.12	1.92			0.83		1.02	1.09			0.98	0.91	1.23		1.49			1.12	1.06	1.71	1.74	1.22	1.19	1
SNP_A-8460428	rs16961184	ATPBD4				2.91													1.02										1.07				1
SNP_A-8509447	rs16960839	ATPBD4	0.75	1.07	0.89	0.77		1.21		1.26	2.04			0.85		1.19	1.12			1.05	1.02	1.13		1.08			1.03	1.15	0.96	1.27		1.51	1
SNP_A-2200648	rs4826225	ATRX								2.06			0.97								0.87	1.41								1.04			1
SNP_A-1834904	rs1150628	ATXN1				2.01	0.89	1		1.06	1.57			1.46	1.34	1.04								0.97	0.95	1.05	0.95		0.99	1.31	1.09		1
SNP_A-1847923	rs235158	ATXN1		0.95				0.92		0.93	3.44				0.97		0.98							1.46									1
SNP_A-1920583	rs2237189	ATXN1		1.19	0.77		1.09	1.1					1.23		0.79	0.88	0.99		1.05							1.12			2.17		1.08		1
SNP_A-8382588	rs3806144	ATXN1					1.16	1.05						0.92	1.25									0.88	1.02	0.93		3.74					1
SNP_A-8388558	rs9477153	ATXN1			0.77	0.98	1.01				1.3							0.67	0.96			1.22			2.55	1.14			1.44	0.97	1.07		1
SNP_A-8435498	rs6459471	ATXN1			0.96	1.92																			2.07				1.12	1.34	0.93		1
SNP_A-8544812	rs4716077	ATXN1		0.7			1.07	0.98		1.01	2.14				1.09		1.08							1.2									1
SNP_A-8630421	rs16878937	ATXN1	0.96			2.94		1.01	1.02							1.09	1.3			0.91												0.94	1
SNP_A-8657032	rs421172	ATXN1			1	1.02	1.05			1.28	1.15	1.17		1.07	1.51							0.84	1.03	1		0.97	1.36	2.04		0.9	1.02		1
SNP_A-8668103	rs2237166	ATXN1	0.75	0.95		2.27										1.03							1.05						1.17				1
SNP_A-2204464	rs16907290	AUH		0.8			1.68				0.89				2.17	0.94					0.84		0.88						0.99	1.07		1.32	1
SNP_A-1870141	rs1880368	AUTS2					0.97		1.39		5.92		0.63		1.01		0.71	0.76	1.18				1.36				0.94					1.02	1
SNP_A-1990112	rs6415223	AUTS2					1.03		1.08		1.1		0.91					2.1	1.01				1.32				1.2					0.83	1
SNP_A-1990116	rs6460542	AUTS2					2.2		1.26		1.38		0.66						0.68				1.14				1.04					1.47	1
SNP_A-1990136	rs2293496	AUTS2	0.8	1.1	0.95		0.78		0.97				1	1.15			1.31	1.01		1.22		1.11	1.24	1.03	2.13	1.28	1.04	1.16	0.99			1.11	1
SNP_A-2052778	rs17140871	AUTS2					1.65		2.21				1.4					1.56			1.01											1.96	1
SNP_A-2264992	rs1464786	AUTS2				2.1	1.81		1.3		1.25		0.93				0.79	1.94	1.09			1.06	0.88		0.52	1.09	1.09					1.66	1
SNP_A-4266411	rs3922333	AUTS2	1				1	1.02		3.13	0.86		1.02	0.84					0.92		1.12	1						1.04	1.02	1.45	1.14	0.83	1
SNP_A-8297310	rs10228883	AUTS2	0.98	0.85	1.05				0.96				1.1	0.85				1.09	0.73			1.39	0.92	1.3	2.89	1.16			0.91			1.19	1
SNP_A-8329714	rs12698902	AUTS2						1.64			3.02								1.89		0.93		1.68				1.67						1
SNP_A-8366579	rs17141692	AUTS2	0.74	1.03		2.05		0.74				1.26	1.19					1.08	1.52	0.92		1.01					1.03	1.34	0.69				1
SNP_A-8388888	rs4718962	AUTS2		0.89	0.9				2.16	1.18														0.61							0.92		1
SNP_A-8426109	rs13222337	AUTS2			1.02														0.61		1.73		1.23							2.35			1
SNP_A-8494043	rs2293504	AUTS2	1.07	1.13	1.23				0.95				1.17	0.7			1.26	1.23	1.32			1.08	1.12	1.15	2.11	1.15			0.87			1.05	1
SNP_A-8566862	rs13237811	AUTS2					0.99		1		1.13		1.29					0.91	2.08				1.65				1.49					2.27	2
SNP_A-8586271	rs6946969	AUTS2					1													2.17													1
SNP_A-8670355	rs4718959	AUTS2		0.79	0.78			0.64	2.15	3.58	0.69	0.9		0.96	0.91					0.88				0.82			0.79	0.99			0.96		2
SNP_A-1841883	rs2684932	AVEN		1.05	1.01		1.82		0.84	1.57	1.38			1.15	1.67		1.52	0.71				0.72			0.82	0.87	0.92		0.93		1.57	2.17	1
SNP_A-8689573	rs7177269	AVEN														1.13					2.83												1
SNP_A-8690340	rs1862917	AVEN		0.98	1.17			1.75		0.87				0.67			1.05										0.87		1.41	2.25		2.22	2
SNP_A-8427300	rs11649255	AXIN1	1.22								1.42		2.2				1.67					0.74											1
SNP_A-8626600	rs9861850	B3GALNT1			1			0.72	0.8	0.88		1.01	1.39	1.04			1.44	0.71		1.74	2.2							1.04	0.98				1
SNP_A-1878768	rs836696	B3GALT1				1.09		0.89	1.08			0.44		2.03					0.69					1.92	1.39		1.07			1.24			1
SNP_A-2092287	rs6718868	B3GALT1	1.31		2.03		1.07							1.6	1.42		1.66		1.03			0.51		1.28			1.2					1.57	1
SNP_A-1812999	rs7998271	B3GALTL	1.21	1.1	0.94	1.36	0.78	0.78		1.06				0.92			0.61	1.19			0.55		1.06					2.15		0.7			1
SNP_A-2121255	rs9315123	B3GALTL	0.61		2.14	1.42	1.65	1.05		0.77				0.87			0.87	1.18			0.87		0.86					1.3		0.82			1
SNP_A-8623356	rs4065552	B3GALTL	1.1	0.84	0.83	2.02	1.02	1.16		0.92				1.41			0.92	1.22			1.07		0.7					0.94		1.27			1
SNP_A-2103834	rs2038477	B3GAT2			0.68	1.13				1.14			1.12	1.2					1.11						0.89	1.36			2.34			1.77	1
SNP_A-1809301	rs9912207	B3GNTL1	2		2.09	0.73	1.05			2.48	1.05			1.47	1.69		3.34		1.22				1.36						1.23		1.06	1.57	4
SNP_A-8377445	rs12948107	B4GALNT2	0.97			2.3						1.13		1.14								0.99											1
SNP_A-4285591	rs7294326	B4GALNT3											3.38																				1
SNP_A-2146674	rs10971418	B4GALT1										1.06							1.32					2.37					1.6		0.81	1.15	1
SNP_A-2048667	rs9850349	B4GALT4	0.99	0.9			0.82	0.99	0.87							1.44	1.14				1.07	1.01						0.79		2.19	1.17		1
SNP_A-2153132	rs6012712	B4GALT5	0.88		0.71	2.57	0.99	1.11				0.86			1.04		0.92		1.26	0.82		1	1.04	1.01	1.16	0.76	0.98		1.2			1.05	1
SNP_A-8685422	rs1157213	BAALC									1.01	2.09						1.05											0.98				1
SNP_A-8703589	rs1572983	BAAT			1.02					1.5		1.41	0.77				0.83					1.39			2.34								1
SNP_A-1898275	rs604912	BACH2				1.81													0.79						0.94						0.63	2.77	1
SNP_A-2269835	rs9451340	BACH2			0.4						2.09		0.74								0.68							0.74	0.55			0.83	1
SNP_A-2283190	rs12528427	BACH2				0.91															1.27											2.1	1
SNP_A-8570747	rs4141551	BACH2				2.89				1.3							1.28		0.85			0.78			1.35	0.9				0.61		1.01	1
SNP_A-8642876	rs9444730	BACH2					0.89	0.75	2.18		0.71	0.99		1.11	1.78		0.85	1.15		0.64				0.75		0.83							1
SNP_A-1986341	rs1415035	BAI3	1.05					1.19					2.16		1	0.91		1.12		1.11						0.95		0.74	1.19				1
SNP_A-2099669	rs493682	BAI3			0.88		1.36				2.12			1.17				1.22	1.02			1.28	0.93	0.86			1.04	1.21					1
SNP_A-2230469	rs6911395	BAI3				4.22																		1.81									1
SNP_A-4265716	rs3823070	BAI3									1.19		0.85													2.3							1
SNP_A-8370369	rs10945147	BAI3																					1.01	0.91			1.32	2.14					1
SNP_A-1819125	rs4699261	BANK1	1.14								1.37														1.13					2.41	2.22		2
SNP_A-1838031	rs13117264	BANK1	0.97								1.06																			2.09			1
SNP_A-1925323	rs11734196	BANK1							0.79									1.08	1.03	2.04													1
SNP_A-1978285	rs10516487	BANK1									1.15																1.11		2.22		1.02	1.62	1
SNP_A-2010024	rs4337734	BANK1		1.11					2.69		0.84							0.87		0.79				0.78				1.69		4.55			2
SNP_A-2010025	rs4530633	BANK1	0.83						2.12		0.87						1.06	0.96						0.71	1.15	1.61	1.78	1.3	0.65	3.28			2
SNP_A-2156815	rs6833249	BANK1		0.91				0.7				1							0.95								1.23	0.95			2.18	2.7	2
SNP_A-4257504	rs41507945	BANK1		1.07								1.03												1.01	0.81			2.2					1
SNP_A-8301516	rs901406	BANK1	0.87	0.95										0.86			0.78			0.74						1.2	0.96		2.61				1
SNP_A-8350920	rs6844449	BANK1	1.18		1.02		1.92		1.76		1.51	1.51		1.31	0.7			0.59				2.54	0.65			1.05	1.11		0.88	1.1			1
SNP_A-8380858	rs2631244	BANK1	0.82	1.13										0.58			0.42			0.93						1.07	0.98		2.09				1
SNP_A-8437392	rs17208914	BANK1	1.02						0.98		1.31	1.54		0.88			0.97	1.26						0.95		1.03	0.9	1.06	2.68	1.24			1
SNP_A-8662826	rs4365725	BANK1									1.3															0.87		2.53		2.42			2
SNP_A-8356615	rs16852643	BARD1			1.15				1.26			1.14	0.89	1.27			1.29					1.03									2.18	1.04	1
SNP_A-8373483	rs2261033	BAT2	0.91		0.84	0.83	0.83					1.16								4						1.17	1.21						1
SNP_A-2097050	rs2272810	BAT2D1	0.89			1.05	0.93	0.71				5.55	1.1		1.12	1.01	0.86		1.12			1.18		0.83	1.39	0.87		0.81	1.04			1	1
SNP_A-2213881	rs10913141	BAT2D1			0.91	1.08		0.86										0.75											2.1		1.11		1
SNP_A-2085955	rs2966339	BAT2L						0.9	2.41	1.2		0.76						1.03															1
SNP_A-2046196	rs7342544	BAZ1A						0.88													1									3.22			1
SNP_A-1889787	rs12995487	BAZ2B	1.03			2.23			1.29	0.97	0.93						1.02		1.01	1.04	1.05	1.13		1.09		1.03		1.13		1.01		1.12	1
SNP_A-2131778	rs10181248	BAZ2B			0.96				2					0.78	1.06		1.22	0.82	0.77			1.34				1.16		1.02	1.27	1.07		0.88	1
SNP_A-2303748	rs10192547	BAZ2B		0.91					1.27	0.74	1.37						0.97		0.91		0.89	0.93		0.8		0.87	1	2.19		0.73	0.87		1
SNP_A-4258004	rs4664286	BAZ2B				2.67			0.91	1.45	1.06						1.14		1.34		0.93	0.89		1.3		1.26		0.93		1.13			1
SNP_A-8574619	rs3771688	BAZ2B		1.21	1.04	1			2.3					0.83	1.25		1.43	0.74	0.73		1.48	1.49		1.55		1.31	1.31	1.2	1.62	1.32	1.88	0.82	1
SNP_A-4201352	rs12594320	BBS4		0.97					2.09	1.12	0.99			1.19	1.19	0.87					1.01		1.41										1
SNP_A-8502422	rs12692909	BBS5		1	0.98		0.97					0.92			1.38				3.95				1.08					1.57		1.68			1
SNP_A-1832189	rs2598404	BBS9			0.76					2.07	1.12		1.13							1.09				0.88			0.63		0.87		0.9		1
SNP_A-1954450	rs10273634	BBS9	1.01	1.15	1.32		1.59	0.48			1.91	0.58					1	1.14		0.64		1.3	1.54		1		2.6	1.73	0.84				1
SNP_A-1989460	rs6979640	BBS9													0.62													2.56					1
SNP_A-1989467	rs1451015	BBS9	0.63		0.9		0.98			2.66	2.79			1.33				0.93		0.85			0.59				0.64	0.9				0.69	2
SNP_A-2075515	rs1419922	BBS9							2.03							1.19									0.79		0.95			1.21	1	0.65	1
SNP_A-2117126	rs17475728	BBS9	0.94										0.95	1.62			2.76	1.05	1.15			1.2						0.92					1
SNP_A-2155078	rs1009355	BBS9	1.06	0.7		2.24		1.01					1.21	1.39	1.29	1	0.93			1.5		1.02			0.94			0.98	0.68				1
SNP_A-2164514	rs17170246	BBS9							0.95							1.09									1.13		0.9			0.93	1.02	2.42	1
SNP_A-2179445	rs10232000	BBS9		0.81		1.13	1.1	0.92	1.21		0.8	1.26	1.01	1.2					1.31	0.94		0.91	1.02	0.87	1.38			2.65	1.24		0.84		1
SNP_A-2245201	rs10269937	BBS9			1				2.97							1.53						1.26					1.07			0.84	1.52	1.44	1
SNP_A-2273898	rs2700695	BBS9		0.99	1.15	1.21	1.11			2.74	1.66			1.63				1.05		0.86					1.85		0.95	1.22				0.78	1
SNP_A-4280661	rs961679	BBS9		0.88		0.86	1.05	0.86			1.4	1.16	1.18	1.09		0.79			1	0.78		1.1	0.86		1.48			0.87	1.16		2.58		1
SNP_A-8313456	rs1020520	BBS9	1.08		1.19	1.07	1.99			0.82				0.91	1.3			0.78		0.88		1.53	0.97					1.41				2.23	1
SNP_A-8351418	rs4720111	BBS9		0.88	1.1	1.37	1.31	0.56											0.97	2.72					1.46		0.77		2.12	2.33	1.1	2.34	4
SNP_A-8467008	rs10267370	BBS9		1.14		2.1	0.65	0.84	0.83		1.48	0.56	1.12	0.91					1.05	1.04		1.06	1.03				1	0.82	1.02	1.33		1.4	1
SNP_A-8671584	rs13235723	BBS9			0.94				2.29							1.8						0.45					1.02					1.25	1
SNP_A-4277745	rs17207620	BBX		1.1																			0.81	2.55		1.39		0.81					1
SNP_A-4234129	rs2057837	BCAP29		0.84		2.18				1.08		0.98		0.72				1.15						1.16	0.84		1.07					1.14	1
SNP_A-8451682	rs8062565	BCAR1	1.19	1.09	1.19									1.38	2.13	1.43			1.46	1.23	1.34	0.91	1.06	0.88		0.9	1.02	0.64	1.12	1.26		1.72	1
SNP_A-1792920	rs6127073	BCAS1						0.7			2.04	1.14						0.7	1.19	1.08	0.64	0.87		0.93	1.25	0.9		1.65	0.87			1.06	1
SNP_A-1882029	rs6097745	BCAS1						0.53				1.76						0.88	2.72	1.34	0.95	0.7		0.96	1.28	1.57		1.12	1.17			1.5	1
SNP_A-8433116	rs8120953	BCAS1			0.59		0.69	0.77					0.79		2.19		1.39			0.82											0.98		1
SNP_A-8556703	rs2276499	BCAS1	1.15				0.72	0.68	0.78	2.76	0.96					1.69			1.36	0.82	1			0.87				1.19	0.79			0.81	1
SNP_A-1865703	rs12940510	BCAS3	1.02	0.95		2.15		0.86		0.89					0.96				0.94						0.99		0.96	1.17					1
SNP_A-1926008	rs7218256	BCAS3	0.88	1.05						1.35									1.03				0.98					1.22				2.01	1
SNP_A-2172151	rs11658956	BCAS3		1.27	1.19					1.85			1.39				1.58	1.67						0.98	0.95		0.89		1.16			2.39	1
SNP_A-2310977	rs8082635	BCAS3	1.33						1.03					0.97								1.09	1.36		0.75							2.75	1
SNP_A-4242245	rs12948356	BCAS3			1.47			1.3	1.6	1.62		1.2		1.8			2.12	1.5			1.59		1.23			1.18		1.7			1.32	1.5	1
SNP_A-8565053	rs3785864	BCAS3				1.49		1.42								0.94									1.1		0.92	1.05				2.22	1
SNP_A-8694119	rs2052074	BCAS3	1.07	0.84						2.02					0.98				1.12				1.24					0.65					1
SNP_A-2037168	rs7961152	BCAT1	0.84										2.18							0.91													1
SNP_A-2060332	rs7954529	BCAT1	2.07																		2.64								1.31				2
SNP_A-8316250	rs10771138	BCAT1																						2.3									1
SNP_A-8587342	rs1863173	RAPGEF4																											2.1				1
SNP_A-8713417	rs1118936	MAGI2	1.55		1.43							0.62	2.62			1.38	0.8	0.81	1.15	0.83	0.98		0.95						0.74		0.83		1
SNP_A-1858055	rs7752880	PDE10A									3.08						0.64																1
SNP_A-4195589	rs1327535	SVEP1	1.1						0.96	1.01					1.76		0.8				2.02	1.16	0.62					3.59					2
SNP_A-8542393	rs7867494	RORB			1.27	2.26		0.95		0.74	1.08	0.77						1.25			1.3	0.63		1.9		0.82	0.78						1
SNP_A-1963519	rs76674	BCL11A			1.09				1.27		1.07												1.28	2.11					1.16				1
SNP_A-8643607	rs6567334	BCL2			0.96	1		1.06		1.02								1.02		1						0.93		1.36		2.07	1.38	1.59	1
SNP_A-8325888	rs11054689	BCL2L14													2.2		1.14																1
SNP_A-1966002	rs10494250	BCL9								2.41	1.57																						1
SNP_A-4236819	rs2676377	BCO2		1.28			1.08						2.05	1.38		1.37					0.94		0.99	0.87					1.31				1
SNP_A-1844337	rs2069274	BDH2					1.09				1.04	0.8			1.71		0.81	0.98			1.52				1			1.26	1.11	2.99		0.82	1
SNP_A-2009065	rs7127239	BDNFOS			1.68	1.41		2.08	1.93	1.44	1.04					0.92			0.87						0.67		1.3		1.22	1.27			1
SNP_A-4206225	rs988712	BDNFOS				2.76									0.74							1.38		0.71				1.75					1
SNP_A-2089424	rs7448422	BDP1		1.35	1.23									2.07					1.52				2.04										2
SNP_A-8507285	rs9382671	BEND6	1	1.19				1.17	1.6	1.08	1.41		1.15	2.24	0.74	1.02		1.22	1.14		1.02	1.36	1.39		1.1			1.02	1.67			1.24	1
SNP_A-1974424	rs2078262	BFSP2			0.91			0.85		0.95	2.01	1.58		1.26				1.04	0.97	0.89	1.14	0.98	1.11		0.96	1.02			0.94			0.76	1
SNP_A-8334370	rs3807626	PDE1C	1.2	0.94	0.68	1.18					1.18	0.44					2.38			1.33	1.65		1.74	0.9		0.88				1.04			1
SNP_A-2221737	rs12783881	BICC1		0.68							0.75		1.24					0.93				0.71		2.14									1
SNP_A-2226089	rs10763558	BICC1	1								0.74			2.06			1.33				1.08			1.09									1
SNP_A-8632171	rs1658469	BICC1	1.24								2.08			0.73			0.48	1.28			1.03			1.07					0.84				1
SNP_A-1907958	rs11051810	BICD1				2.02			0.96	1.64		0.89	0.84	1.49	0.96				1.13	1	0.81							1.38	1.36	1.01			1
SNP_A-1923095	rs2683471	BICD1				1.2			1			0.99	0.96	2.27	1.36	1.14						1.44	1.14		1.02		1.25	1.3				1.08	1
SNP_A-2048451	rs1143900	BICD1				0.92					0.81	0.89						1.06	0.99	1.78	1.25	0.69			1.48			1.77	0.97		2.12		1
SNP_A-4227567	rs1684147	BICD1				0.88			1.17		0.92	0.93	1.16	1.2	2.23	0.84						1.05	1.2		1.13		1.03	0.96				1.91	1
SNP_A-8372967	rs708226	BICD1	0.86	0.78	1.23	1.07	1.13							1.09	1.08	0.66	0.93	0.92	1.1						0.81		0.99	1.2			2.32		1
SNP_A-2246368	rs4762016	BIN2								2.16			1.6			1.16					1.55					1.46					1.48	2.51	2
SNP_A-2236445	rs1871900	BIN3			1	1.07			1.16	1.05	1.1				1.02			2.37	0.8		1.23			1.25		1.11		1.19		1.05	0.95	0.94	1
SNP_A-1781325	rs1570544	BIVM	0.89						0.92	1.13	1		1.21	1.09		1.12	1.16	1.07		0.87	0.73	0.97	1.04	1.01		1.12						2.39	1
SNP_A-2232205	rs9554899	BIVM	1.05					0.9	2.09	1.01	1.03		1.17	0.94		0.83	0.97	0.98		1.26	0.99	1.03	0.97	0.93		1.04		1.09		1.06		2.01	2
SNP_A-8390230	rs1536377	BIVM	1.04						1.13	1.03	0.95		1.31	1.02		0.72	0.93	1.04		0.97	0.96	0.88	1	0.88		0.99					0.88	3.45	1
SNP_A-1781136	rs2518967	BLM	1.53					1.86					1.61	1.94	2						1.2	1.19	1.16	1			0.96	1.38	0.97				1
SNP_A-2130321	rs3815003	BLM				2.21				1.41																			0.97				1
SNP_A-8399070	rs414634	BLM							2.09			0.9				1.48																	1
SNP_A-8502835	rs12592875	BLM							1.21	0.99				1.89	1.03				1.24		0.85							2.21	1.03	1.06			1
SNP_A-8557974	rs3775514	BMP2K	1		0.97	2.2	1.03								1.15				0.99	1.02			1.02		1.3		0.88		1.38		0.98		1
SNP_A-1934288	rs9296803	BMP5									2.24																						1
SNP_A-8550574	rs12215796	BMP5		1.47						1.27			2.36	2.43			1.85							1.22					1.05	1.07			2
SNP_A-1819275	rs11760020	BMP6					1.33		1.01	2.07		0.85	1.25						1.14	1.51	1.24	1					1.02				0.8		1
SNP_A-8388290	rs13196371	BMP6					0.75			1.41	2.02	0.98	1.06			1.25			0.82	1.41		1.04		1.02				0.89			0.99	0.96	1
SNP_A-8361093	rs4934272	BMPR1A			1.16			0.75	1.25	0.76	1.21					1.04		0.99	0.84			1.2	0.55	1.09	1.09			2.38	0.93			0.99	1
SNP_A-8682247	rs2279188	BOD1				2.01	0.94		0.78				1.03	1.11			1	1				1.07	0.92	0.98	1.03		0.96	0.98	1.15			1.25	1
SNP_A-2259330	rs10231475	BPGM	0.97			2								1.22			1.05		0.84							0.68		0.86				1.02	1
SNP_A-4214466	rs8074078	BPTF		1.23			1.45		1.32				1.11	1.82			2.22	1	1.46			0.97	1.03	0.96	1.01	0.78					0.9		1
SNP_A-1884545	rs206081	BRCA2		0.85		0.87				1.6									1.08					1.27	0.99				1.29		2.23		1
SNP_A-8481954	rs573014	BRCA2							2.21		1.45	1.1	1.47	1.13	1.77		1.42	1.18		1.03		1.08				1.52			0.96				1
SNP_A-2096282	rs138830	BRD1						1.26												2.78								1.23			0.91		1
SNP_A-2143526	rs7577342	BRE	0.94	1.48	0.99		1.24		1.25			0.8			1.04	0.9	1.65		0.77		1.67	1.15	2.1			1.42	1.13			0.56	1.9	1.6	1
SNP_A-8472250	rs12617913	BRE				1.04	0.87	0.93		1.27		1.62	1.13	1.55			2.29	1.44							1.06		0.73	0.46	1.03		1.05		1
SNP_A-8510900	rs11902458	BRE		1.61	0.9	1.26	1.94	2.55		1.33			2.16						1.83			1.3		0.98	1.33	1.19	0.91			1.86	3.08	1.84	3
SNP_A-4289759	rs2106663	BRIP1		0.77		1.27	0.9	1.16	2.3	0.98							1.12	1.19	1.4	0.97	1.08	1.52				1.33	1.38	1.85	1.73		1.39		1
SNP_A-8447116	rs11654606	BRIP1		0.82				2.01		0.72												0.85				1	1.66						1
SNP_A-8479669	rs1557720	BRIP1			1.35				1.82					2.22							0.97	1.45	1.47			0.94					1.32	1.27	1
SNP_A-8555225	rs7220688	BRIP1		0.98	0.71	0.98	0.79	1.13		0.83				1.65			0.87	0.97	1.21	1.38			1.16				1.07	2.4	0.97			0.85	1
SNP_A-4209209	rs10489202	BRP44										1.11	1.94	2.71														0.98			0.7		1
SNP_A-8457307	rs9662946	BSND		0.74	0.86		1.22		0.88	0.93	0.86		2.12	1.29		1.26	1.04	1.15	1.07	1.55	1.26	0.8			0.88	0.77	1.02	0.66		1.05	0.87	1.01	1
SNP_A-2037542	rs2048901	BTAF1	0.87	0.97		2.45			1.92			0.49					1.62	1.02	1.15			0.94	1.12	0.85		0.97				1.22			1
SNP_A-1929005	rs9470825	BTBD9								1.04		1.31	1.14		2.15	0.85			0.69			0.95		0.93	1.04				0.7	1.01			1
SNP_A-4284467	rs4711531	BTBD9	0.89	0.5	0.75		1.01	1.11	1.96	0.97	0.85	1.77	1.45			0.86		0.88	0.89		1.06	0.78		2.05	1			1.18	1.19	1.25			1
SNP_A-8389174	rs4714152	BTBD9									1.18		0.83	2.03								1.19			0.89					1.36		1.02	1
SNP_A-8417554	rs228186	BTBD9		0.93		1.4					1.18		1.06	1.13								2.17			0.79		0.77			1.03		1.05	1
SNP_A-8451423	rs228184	BTBD9	0.93	0.93	0.67	0.9	0.78	0.8	1.71	1.27		1.17		1.02			0.89	0.98	1.01					0.98				1				2.14	1
SNP_A-2272081	rs37434	BXDC2		1.19		1.08		1.21		1.01							1.07			1.29			1.05							3.18		0.95	1
SNP_A-8354914	rs2881880	BZW1					1.2			1.17			1.71				1.13	0.99	0.87				0.97				1	2.02		1.16			1
SNP_A-2001754	rs2248518	C10orf107	0.87										1.27	1.07							2.04												1
SNP_A-2137454	rs10761593	C10orf107					1.1											1.45			0.29						2.56						1
SNP_A-8290664	rs1530440	C10orf107							1.14													2.27									1.01	1.16	1
SNP_A-8580376	rs2588915	C10orf107							1.35									1.38				2.02					2.35						2
SNP_A-1856064	rs11001790	C10orf11			0.74					1.04	0.89	2.19			1.6		1.37		1.41			1.12	1.16	1.29	0.91		0.93						1
SNP_A-1882546	rs1323076	C10orf11			1.17				2.15		1.48	1.16	1.02		1.47		1.67	1.43		1.04	1.83			0.89			0.93		0.67		0.9		1
SNP_A-1884723	rs11001535	C10orf11			0.92			1.02		0.93						2.44	1.02	1.2	1.14	0.97	0.87		0.86	0.8									1
SNP_A-1888808	rs7101263	C10orf11																											2.05				1
SNP_A-1915671	rs16932945	C10orf11			0.97		1.08							0.72			1.34	1.13		1.3	2.57	1.04	0.88		1.02	0.62							1
SNP_A-1929887	rs11001592	C10orf11	0.78													0.72								2.66					1.82				1
SNP_A-1945490	rs12414690	C10orf11								0.82						1.45			1.2		2.5								1.76				1
SNP_A-2002728	rs16933556	C10orf11	1.07						2.36							1.15										1.95	0.93						1
SNP_A-2046468	rs1323077	C10orf11						1.19		1.07	1.14			0.96		0.83							0.88		1		1.01	2.04	0.81				1
SNP_A-2248669	rs16932913	C10orf11			0.88			1							2.49		1.23	1.66					1.11					1.14					1
SNP_A-2301203	rs7909516	C10orf11	1.08					0.85	0.55		0.78			1.26		1.13				1.23			0.99	0.92	0.77		0.99	2.12	0.91	0.98		0.99	1
SNP_A-4283812	rs7093663	C10orf11			0.91									0.9			2.76	1.29		0.9	2.37						0.92		0.73				2
SNP_A-4286193	rs7915954	C10orf11										0.87		1.2								0.97				2.18			1.47				1
SNP_A-4289733	rs4746391	C10orf11		0.92	1.19	1.37			1.32	1.09	0.8	1.67			1.02		0.93					1.09	0.93	1.05	0.99		1.02				2.12		1
SNP_A-4290214	rs2579759	C10orf11			1.02					1.01	2.1	1.25		1.24	1.53		1.3		0.9				1.54	1.21	1.09		1.04		0.93		2.53		2
SNP_A-4300059	rs11001720	C10orf11	1.14		1.02									1.73					2.24						1.78								1
SNP_A-8288265	rs7077442	C10orf11	1.11													2.03							1.15										1
SNP_A-8344922	rs11819487	C10orf11	1.03		1.37			0.62						0.85		0.87			0.96			0.94	0.58	0.74					1.04	2.33			1
SNP_A-8351153	rs7916103	C10orf11	0.96	1.05	1.34					1.01	1.63			1.07	1.75	2.17	1.17		1.1				0.74	0.7	0.95				1.44		0.69		1
SNP_A-8382878	rs12573333	C10orf11		0.62										2.3														0.86					1
SNP_A-8485470	rs7915302	C10orf11	0.99	0.82				1.67	0.97		0.69			1.7		0.79				0.91			1.61	0.33	1.03		1.04	0.91	0.58	1.62		3.95	1
SNP_A-8642726	rs1907322	C10orf11	0.96						1.3					2.67		2.23						1.54							0.66				2
SNP_A-1799996	rs7078711	C10orf18		0.82		0.61		1.29				0.81	1.36	2.46	1.72			0.86				1.05	1.44			1.02	0.88		1.36	1.93	1.36	1.96	1
SNP_A-2229397	rs10905065	C10orf18	0.99		0.89										1.36				1.08			1.24		1.05				0.96	1.23	2.8			1
SNP_A-2004066	rs11187581	C10orf4	0.89	0.87			1.24				1.03			1.13		1.18		1.03						2.08		1.98							1
SNP_A-1825384	rs10827097	C10orf68						0.85				0.92				0.96			1.02								0.88	1.49		1.27	1.25	2.74	1
SNP_A-1844975	rs16933701	C10orf68	1.13					1.5							0.96	0.99			0.7					1.23				2.71	1.08		1.39		1
SNP_A-2154471	rs7089366	C10orf68	0.75					0.83							0.8	0.94		1.07	1.02					1.38				1.75	2.55		1.91		1
SNP_A-4245008	rs1335993	C10orf68						0.87				0.86				1.06			1.16								0.71	3.01		1.17	1.14	1.3	1
SNP_A-8598895	rs11594145	C10orf68	0.86					1.16							0.88	2.12		0.84	1.05					0.85				0.69	0.74		0.9		1
SNP_A-8643505	rs1541135	C10orf68	1					0.75	0.78	0.93	0.78	1.17		0.45	1.11	0.69			2.64					0.99				2.09	1.25	1.25	1.87	2.43	3
SNP_A-8287662	rs2175918	C10orf72		1.2		2.07				1.46			1.36			2.01		0.8		1.08												1.1	2
SNP_A-2137765	rs6584466	C10orf76	1.01	1.04			0.95		1.85	1.3			1		0.93		1.07	1.02	0.77			0.71		1.12	1.2	0.93	1.04	2.14					1
SNP_A-1826517	rs1979579	C11orf24			1.22	2.01								1.06					0.87	0.95		0.83			0.77			1.09				0.87	1
SNP_A-8632306	rs7131180	C11orf63								3.06	0.94			2.12					1.45			1.06						1.19					2
SNP_A-2002143	rs2605609	C11orf75		0.95			0.77	0.76	2.02		1.69	0.93	1.06	1.19	1.02	0.96		0.97				1.16							0.71	0.75		1.4	1
SNP_A-8332265	rs2608271	C11orf75						1.9			2.21	1.21	1.64				1.53				1.58		0.81		1.09		1.1			1.11	1.82		1
SNP_A-2270228	rs6581270	C12orf40							1.04					0.82	2.01	1.07		1.5	1.6						1.01		1.07					2.15	2
SNP_A-2051122	rs17033809	C12orf42					0.99	0.99				0.93									1.61					1				3.12			1
SNP_A-2071406	rs10778245	C12orf42				1.21	1.52								1.45									2.07	1.76		0.86					1.94	1
SNP_A-2131469	rs10778237	C12orf42		0.87		0.96	1.01	0.88		0.79			1.83			1.37					1.27		0.71	1.02		0.97	0.92	0.67	0.99	2.08			1
SNP_A-2135131	rs7294776	C12orf42			0.94	2.64		0.88																									1
SNP_A-4196277	rs10860982	C12orf42	0.97		1.11	0.98		0.73					2.67																	0.97			1
SNP_A-4245736	rs11111555	C12orf42						1.04				1.22					0.98			0.79				2.16	1.66		1.04		1	1.89	1.51		1
SNP_A-4278501	rs10161218	C12orf42	1.48				0.98	2.2													2.08	1.32			2.48		0.97						3
SNP_A-4279333	rs10507165	C12orf42		1.21		1.16	0.89	1.25				0.97	2.44				1.34	0.86			1.34					1.01			0.89	0.75	1.13		1
SNP_A-8456764	rs11111525	C12orf42	1.07		1.3	2.33		0.99					1.24									1.17						0.88		0.75			1
SNP_A-8456789	rs10507164	C12orf42		0.85	0.98		2.13																				1.06						1
SNP_A-8456790	rs1343985	C12orf42			0.7	1.25	1.3	0.79		0.88											0.88						1.14	0.61	1.7			2.55	1
SNP_A-8504948	rs7303147	C12orf42						0.79				1.3			1.17		0.99							2.4	2.09		1.13			1.6	1.09	1.74	2
SNP_A-8566638	rs10778253	C12orf42						1.32				0.64	0.7		0.91		1.59	0.94			1.52			0.87	2.36	1.06	1.19		1.36		0.83	1.39	1
SNP_A-8569472	rs10778241	C12orf42																							1.46					3.62			1
SNP_A-2145073	rs7138000	C12orf44		1.1		1.1	1.5	2.98	1.17	1.17	1.25	0.78		1.09	1.22		1.09		1.23			0.9	1.02				0.99				1.27	1.52	1
SNP_A-8546264	rs11112284	C12orf45		0.98				1.66		1.73			0.94						1.45		0.77		0.88	2.05	1	1.02	0.93		0.82		1.15	1.04	1
SNP_A-8546305	rs17700406	C12orf5		1.56		1.04	1.47		0.92	0.98	0.89	0.98			0.85	1.01									0.76		0.91		2.12		1.28		1
SNP_A-1792203	rs1162976	C12orf56		1.03	1.2				1.68		0.93	1.24		1.21	1.61							1.13	1.29	1.09	0.93				1.26	2.36	1.62		1
SNP_A-1876770	rs10777811	C12orf63	0.93		1.35			1.19						1.03			1.72		1.09		1.16	1.01		0.62			1.04			2.75			1
SNP_A-1892063	rs448088	C12orf70	0.74	0.8					1.1	1.01			1.22	0.84					0.8	1.14	1.11	1.05		1.22		0.98		1.01	1.13	2.02			1
SNP_A-1928698	rs374484	C12orf70	1.25	0.72					0.89	1.23			0.76	1.27					1.1	0.99	1.07	1.22		1.56		1.43		1.05	1.08	2.11		1.1	1
SNP_A-2002619	rs427679	C12orf70				0.8	1.29		1.38	0.83	1.06		1.08						1.27	1.03		1.24	1.22	1.81		1.09		1.02	1.12	2.08	1.16	1.27	1
SNP_A-2002620	rs451921	C12orf70	1.18	0.5					0.95	0.75			0.84	1.51					1.07	0.91	1.05	1.03		1.59		1.23		0.99	1.33	2.13		1.18	1
SNP_A-2043915	rs424880	C12orf70	1.34	0.57					0.88	0.99			0.81	1.38					0.99	1.03	1.13	1.11		1.75		1.21		0.97	0.96	2.16		0.94	1
SNP_A-2146873	rs442088	C12orf70				0.64	1.08		1.36	0.87	1.14		0.91						1.59	0.77		1.13	0.85	1.92		1.26		1.15	1.53	2.8	0.92	1.09	1
SNP_A-4252217	rs3751223	C12orf70	0.87	0.94					1.3	1.14			1.04	0.76						1.15	0.84	1.01		1.09		0.91		0.89	1.02	2		0.82	1
SNP_A-4255710	rs10842922	C12orf70	1.07	1.36					1.21				1.22	1.02						1.01	1.23	0.7		0.74		0.69		0.88	1.05	2			1
SNP_A-4301517	rs11049036	C12orf70	0.98	1.1					3.05				1.97	2.57					0.58	0.81	1.08	1		0.72		0.89		1.41	0.93	1.94			2
SNP_A-2133560	rs259737	C13orf18					0.94					1.04	1.38								2.09		1.11	1.5									1
SNP_A-8561030	rs9316157	C13orf3		1.37	1.3				0.8	1.23	1.02	0.75	1.59	2			1.95		1.46		1.41					0.84	1.73		0.78	1.77		0.87	1
SNP_A-2088167	rs2146938	C14orf132																	2									1.12					1
SNP_A-2244545	rs11625986	C14orf143	0.91			2.01		0.89		0.97	1.23				1.01					1.11			1.07							1.23	1.21	1.15	1
SNP_A-2245409	rs8005836	C14orf143	1	0.93	1.06		1.22		2.17		1.4			1.66							1.08		0.99		1.07		1.14		2.11				2
SNP_A-2293881	rs7156674	C14orf143			0.92	0.86	1	0.99	2.98	1.02					1.03					1.7	1.24				0.82		0.97		0.98	1.38			1
SNP_A-8426544	rs1286937	C14orf143		0.66	0.91		1	1.34	1.34		2.18										1.18		0.97	1.1	1		1		1.07				1
SNP_A-8589489	rs10137726	C14orf143		1.27	0.97		0.83	0.75	0.52		1.07			2.13									0.84	1.04	0.84	0.88	0.97		1.35				1
SNP_A-1868554	rs1868629	C14orf145	1.05					1.23	1.53	1.19	0.68				2.22	0.79	1.02	1.13	0.71		1.25			1.34		1.19		4.23	1.6	1.07			2
SNP_A-1956517	rs1607040	CPNE8			0.92	2.32		1.01	1.38	1.31		1.99			1.4		1.19					0.95	0.93	1.22					0.86	0.95			1
SNP_A-4239130	rs4658090	ZNF644				2.39		0.97		0.98							0.88						0.81						1.01	0.72		1.78	1
SNP_A-2236745	rs10498541	C14orf145			1.18							0.87	0.99	0.84	1.59			1.43	1.36			1.01		1.01		1.12		2.15		1.28	1.06		1
SNP_A-8301136	rs328213	C14orf145	0.86			1.55		2.3	0.7		0.96		0.94			0.58	0.81		0.87	0.66		1.18				1.02	1.04				1.05		1
SNP_A-8368351	rs2044772	C14orf145	1.43					0.92	1.2	1.21	1.4				0.91	0.73	0.97	0.77	1		0.94			0.93		1.35		2.06	1.09	0.94			1
SNP_A-8435936	rs327465	C14orf145	0.92	1.04		1.52		0.97			2.09		1.06			0.9			0.56	1.45						1.56	0.78				1.03		1
SNP_A-8499818	rs12886241	C14orf145	1.11	1.21	0.86			0.73	1.51	1.25	1.02		1.68		0.8		0.54	0.76			1.45			1.58		1.14			1.36	2.23			1
SNP_A-8648161	rs17519	C14orf145		1.15	0.85			1.06			1.36	1.18	1.19	2.06		0.72	0.85				0.89	0.95									1.04		1
SNP_A-8713124	rs8004071	C14orf145	0.9	1.02				1.16	0.81	0.8	1.1	0.91		0.83			0.97		1.19		0.99	0.95						2.11	0.89				1
SNP_A-8630067	rs4903582	C14orf148						0.79			1.23			1.96	0.54	0.55		2.02				1.7				1.04							1
SNP_A-1881089	rs3825575	C14orf182	1.5		0.94			1.86	0.58	1.52	0.74	1.4	2.23								1.59			0.5				1.52		0.65		1.33	1
SNP_A-2061482	rs2336751	C14orf45											1.83	2.25	1.37												1	0.95	1.46				1
SNP_A-8346135	rs729667	C14orf49	1.02					0.74			1.16	1.21	0.86	1.72	1.05		1.12	1.23	0.91		0.94		1.04		0.67		0.99			2.08		1.1	1
SNP_A-2311566	rs2959860	C15orf27											1.66		2.59																		1
SNP_A-4281233	rs2456046	C15orf27	0.99	1.02		0.93	0.74	0.87			2.05				1.79			1.59		0.87	0.81	0.96	0.79			0.69			0.77	0.77	0.68		1
SNP_A-2109522	rs7166202	C15orf33	0.85				0.96	0.69	2.14		1.1	1.07				0.98	0.89	0.94	0.77		0.99		0.87		1.01	1.11		1.06	1.04		1.07		1
SNP_A-2279193	rs10047970	C15orf33	0.62					1.01		1.18	1.85		1.64			1.61	0.92	1.32	1.05		0.8		2.16		1.16	0.88		0.99	0.81		1.11		1
SNP_A-2279270	rs12232355	C15orf33				1.73											0.96						1.94	0.77			1.06	0.8				2.02	1
SNP_A-8415658	rs12900001	C15orf33	0.67		0.91	1.28	1.16		2.59		1.04					1.04	1.46		1.28		1.19	1.01	1.04			1.02	1.26		0.75		1.12		1
SNP_A-8614641	rs16962490	C15orf33	1.39						0.97		0.75					0.58	0.62		0.82		1.51	1.46	0.74		2.62	1.41	0.81		1.02				1
SNP_A-1804192	rs4923719	C15orf41		0.93	1.08				1.19	1.18						0.98						1		0.94		1.02					2.75		1
SNP_A-2173452	rs2839754	C15orf41		0.83																		2						1.13					1
SNP_A-2176239	rs6495868	C15orf41		0.91		1.18				0.62	0.86			0.75			0.95	0.93	1.44	1.29		0.84		1.67		1.04		1.28		2.45	1.16		1
SNP_A-4217283	rs11633985	C15orf41		0.81	0.98	1.15				0.83				1.31	1.42				0.7	0.77	1.23									1.1	2.54		1
SNP_A-4234648	rs6495850	C15orf41	1.33				1.32								2.02				0.87							1.11	1.12					0.99	1
SNP_A-8372503	rs8024246	C15orf41		0.83		1.03				0.72	1.11			0.85			1.01	0.92	1.03	0.91		1.05		1.47		1.16				2.77	1.06		1
SNP_A-8585213	rs12101796	C15orf41		0.97	0.9					1.19			1.19	2.44	2.14				1.16			0.96		1.39		0.99					1.34		2
SNP_A-8521395	rs12932976	C16orf61				2.44		1.03	1.28	1.82		1.39				1.18		0.8			0.98			1.08			1.05		1.09				1
SNP_A-8545326	rs949955	TMEM5		1.11	0.78									2.64	0.75						0.81	1.02	0.95					1.1	0.9				1
SNP_A-2262427	rs1284436	C18orf1	0.83	0.9	1.05	0.94		0.65		1.03	0.75					1.54	0.79		0.88			0.98		0.86	1.11	0.75			2.16	1.35	0.83		1
SNP_A-8422284	rs1290366	C18orf1																			0.98			2.13		1.22							1
SNP_A-2244475	rs9944836	C18orf25	1		0.67			0.89	1.02	2.1	1.02	0.91				0.82	1.11	1.39	0.94		1.42	0.91				0.79	1			1.13	0.88	1.07	1
SNP_A-1883560	rs11082402	C18orf45			1.14	1.29		0.98		0.87				2.38	1.09	1.12					1.14			1.28		1.04		1.04	0.9	1.14		1.36	1
SNP_A-2110331	rs7233508	C18orf45	0.84		1.27		1.34	0.89								1.14					1.4			2.11		1.45	0.98	1.34	1.65				1
SNP_A-8459152	rs10426372	C19orf10			0.95	1.04		1				3.96					1.07			1.05	1	1.01				1.05							1
SNP_A-2038178	rs16963628	C19orf2			0.84										1.07		0.95				1.13			1.03					2.55				1
SNP_A-4225951	rs2108783	C1GALT1	0.8				0.75				2.05	1.46		0.97		1.58			0.61	2.18		0.95				0.84				1.38			2
SNP_A-2082081	rs3006020	C1orf101	1.2	0.95	1.7	0.71	1.47	0.59	0.91			1.05		1.08							1.13		0.89	0.81	2.15			0.66	0.99		1.19		1
SNP_A-2283653	rs12064500	C1orf101									0.6			1.73		1.2								1.3		0.94	0.58	3.92	1.45	0.92			1
SNP_A-8664020	rs684083	C1orf107		0.85		2.05			1.09	1.23				1.3		0.83	0.8		0.81		0.98		0.87			1.18							1
SNP_A-1848514	rs3766138	C1orf112	0.87									0.91		1.17																2.06			1
SNP_A-2045715	rs6687377	C1orf112	0.64				0.8	0.81	1.05			1.11	1.6		0.8	0.89			1.45					1.73				1.19				2.55	1
SNP_A-8541830	rs12097041	C1orf125							0.59	0.54						1.11		1.04		0.48		2.38							0.62				1
SNP_A-8684797	rs2235768	C1orf132		1.1			0.85	1.15										1.05	0.91			3.37									0.91		1
SNP_A-2129208	rs11206912	C1orf168							1.2		0.82								2.39									1.24					1
SNP_A-1815067	rs3729592	INPP4B			1.37		2.19			1.08										0.94													1
SNP_A-4284913	rs857126	C1orf168				0.98	0.92		0.99					2.22		0.72																	1
SNP_A-8389584	rs12047466	C1orf168							1.05				2.15	1.1	1.06												1.2		0.81			1.13	1
SNP_A-1810232	rs1378278	C1orf173				1.37					1.26							0.97		1.09								2.03					1
SNP_A-4218869	rs686329	C1orf173	1.22		1.12	0.79		1.2	1.2			1.28			1.45	0.85		1.33					1.79	2.97	1.56	0.96		3.55	1.68	2.32			3
SNP_A-8431036	rs562916	C1orf173	0.88		0.81	1.24		0.84	1		1.06			2.09		0.93		0.76					0.94	1.41				1.81					1
SNP_A-8568442	rs10890137	C1orf173									1.38							1.4		0.93								2.19					1
SNP_A-8372512	rs6696816	C1orf21																			0.67				2.38								1
SNP_A-8619135	rs12117823	C1orf21	0.96			1.21					0.69										0.73							2.65					1
SNP_A-8449251	rs10798003	C1orf26	1.05	1.07	0.85			0.84		0.9					0.94		0.57				1.13	0.98	0.57	0.76			0.71					2.23	1
SNP_A-8591626	rs6673303	C1orf26		0.67	1.31			0.94		2.09	1.2			0.8	0.95		0.85	0.71					1.32	0.9		1.04	1.15						1
SNP_A-8651885	rs7531652	C1orf9	0.99	0.91	1.11	2.01			0.95	1.06				1.4		1.05			0.98			1.06	1.07		0.99	1.09					1		1
SNP_A-8422695	rs4653452	C1orf95														2.69																	1
SNP_A-8610635	rs151470	C1orf96						1.34	2.24		1.87				1.95			1.78				1.13			1.47								1
SNP_A-8610135	rs291986	C1QB	1.39			0.92				0.95		1.01				1.15	1.03				1.01	1.11		2.5		1.05		0.99	0.97	1.07		1.02	1
SNP_A-1802497	rs299606	C1QTNF3				0.91	1.58	0.78			0.96			0.86	1.19	0.88	1.34	1.09	1.32		1.19		0.94	0.78		0.84		1.27		1.29	2.59	0.94	1
SNP_A-1981196	rs149359	C1QTNF3				2.33		1.15			1.22			1.42		1.01	0.85		0.96		0.89		0.99	1.48		1.21					0.98		1
SNP_A-8404161	rs299607	C1QTNF3				1.1	0.94	0.74			1.39			1.6	1.11	0.92	1.3	0.84			0.81		1.46	1.03		1.28					3.09		1
SNP_A-2028885	rs7663994	C1QTNF7	1.64					0.76					2.25	1.56						0.59								1.41					1
SNP_A-2179421	rs4336218	C1QTNF7	0.98					0.63				1.49	0.85	1.36		0.88				0.85		1.03				1.76	0.86	0.95	2.25	0.74			1
SNP_A-8422919	rs13122790	C1QTNF7				0.97		1.05		1.1		1.15		1.11	1.16		2.25	1.13	1.37											0.89			1
SNP_A-4248330	rs6042367	C20orf7					0.84	0.94	2.29					1.24	1.03	0.84				1.68			1.09										1
SNP_A-8391697	rs7270364	C20orf94			1.04		2.3					1.11		1.03				1.02						0.95			1.16			0.97	0.99		1
SNP_A-8611560	rs640204	C20orf94	1.16				1.14	1.38		2.13	1.86			2.34		1.56	1.74	1.29	1.53	1.35	1.02	0.69	1.07	0.93	0.98			1.38			1.16		2
SNP_A-8644910	rs640584	C20orf94	1.13				0.94	1		1.71	0.89					2.03	1.26	1.03	1.88	1.16	0.66	0.54	0.73	0.7	1.1			1.45					1
SNP_A-8340400	rs1782851	C21orf110	1.67	0.95	1.32								1.83				2.11				1.61												1
SNP_A-1969110	rs1492958	C21orf34	0.9			0.56			1.3											0.59			0.97	2.09				0.61				0.9	1
SNP_A-2015532	rs9978712	C21orf34				2.86																											1
SNP_A-1969854	rs2832207	C21orf7			1.51	0.92								2.39	1.44	1.3		0.85			1.05			0.96			1.09			1.35	1.41		1
SNP_A-8364615	rs13055652	C22orf9			0.92		1.26	1.11	1.12			1.07	2.17								1.09		1.69	0.81				1.06	1.05	1.26		1.3	1
SNP_A-2248389	rs11236000	C2CD3				2.65			1.02					0.75	1.4	0.77					0.9	0.82	0.54	1.28	0.83				0.87		1.02		1
SNP_A-8364732	rs2723225	C2orf21					1.02						2.15												1.01								1
SNP_A-2036441	rs7585022	C2orf27A		0.92			0.56		0.87			0.82							1.31		2.16				0.85	1.74			0.74		0.46	1.01	1
SNP_A-1780600	rs1986238	C2orf3	0.9	0.95		1.18			0.9		0.93	2.33				0.83	1.37						1.18	1.18			0.84			1.14		1.42	1
SNP_A-8702213	rs2298948	C2orf3	1.13	0.62	0.76								1.37					1.16		2.41		0.87				1.08							1
SNP_A-1917119	rs4953122	C2orf34		1.03		1.96	1.15		1.18	1.22				0.92	1.47		1.07	1.05	1.1	1.15	1.12	1.08	1.2		1.01		1	2.47			0.85	1.95	1
SNP_A-2139828	rs4953101	C2orf34		0.75					1.09					0.94	2.45			0.96	1.83	0.87	0.8	1.58	0.96		1.02		0.79						1
SNP_A-2182699	rs6721746	C2orf34			0.62																			2.19									1
SNP_A-2255148	rs6544764	C2orf34		1.11		1.23	1.52		0.94	1.41				0.92	1.29		1.11	1.74	0.97	1.05	1.06	1.39	1.32		1.38		1.02	0.97			0.97	2.05	1
SNP_A-2260233	rs1067409	C2orf34		1.11	0.86	0.95			1.19		1.01	0.99	0.65	0.98		0.59									1.04		0.94		0.65	2.52		0.9	1
SNP_A-2269631	rs12615601	C2orf34		1.14		2.21				1.09				0.81	0.81		1.09	0.78	1.31	1.02	0.84	1.08	1.24		1.15		1.07	0.92				1.31	1
SNP_A-8470020	rs6728449	C2orf34			0.96		1.41		1.21	0.78		0.75	0.88		1.23	0.86			1.04	0.96			0.73		0.83			2.18		0.85	1.64	1.59	1
SNP_A-8484670	rs698833	C2orf34		1.08	0.91	1.81		0.8	1.51		1.34	1.25	0.87	1.68	0.73	0.99	0.97								1.01		1.09		0.79	1.19		2.26	1
SNP_A-8560877	rs786419	C2orf34				2.34	1	1.37										1.04	1.01	0.88		1.01					1.26						1
SNP_A-2022071	rs10469900	C2orf58	1			1.24						1.12		3.81																		1.84	1
SNP_A-4227980	rs1133182	C2orf63	0.87	0.85		2.91	0.77	0.99	0.78		1.3	0.69			0.98	0.84				0.98	0.93		0.95	1.97		1.08						1.72	1
SNP_A-2188569	rs6725694	C2orf86			1.2			1.02					1.33		2.07																		1
SNP_A-8575502	rs1550860	C2orf86			0.84			1.19									2.26																1
SNP_A-1908180	rs2472662	C3orf15			0.76				2.2								1.78	0.9	1.25				0.94				0.9	0.7					1
SNP_A-8380998	rs11712308	C3orf15			1.06				1.06	2.96			0.91				0.98	0.92	0.65			1.01	1.1				1.72				1.37		1
SNP_A-8617256	rs3773491	C3orf19	0.77		0.95	1.56	0.98			1.51	1.2					2.18					0.99	0.7				1.12		1.48	1.19	0.82	1.12		1
SNP_A-8312672	rs1114507	C3orf21	0.61				1.31					0.73						0.93			0.87			0.51			0.87		0.98	0.63		2.44	1
SNP_A-4272064	rs7644467	C3orf23			1.14		1.09	1.03								0.93			1.05	0.95			1.14				1.14	2.13				0.95	1
SNP_A-2206601	rs3952738	C3orf59		1.26	0.9	1.39			2.16	1.23				0.91						1.3		0.95								0.93		0.93	1
SNP_A-2253452	rs4681726	C3orf63	1.03						0.93		0.92				1.77			2.2	0.77		0.97	1.6	0.74		0.99		0.81						1
SNP_A-4291958	rs11719707	C3orf63	0.84						2.36	1.18	0.8				1.14			1.36	0.73		0.86	1.52	1.21		1.1		1.04						1
SNP_A-2207772	rs4403634	C4BPB								1.17			0.88	0.95		2.05			1.01	0.79									1.04		1.28	1.02	1
SNP_A-1795067	rs1382982	C4orf19	0.88					1.21		1.24	0.94				1.37	0.99	0.98	1.15	1.32		0.75	2.73		1.6	1.46					1.65	0.82		1
SNP_A-1976834	rs4107575	C4orf19	1.1			1.27	0.91	0.87			1.27	1.44	0.92	1.85	0.96		1.11	0.89		0.85			0.88	1.82	1.1		0.98	2.24	1.55	1.67			1
SNP_A-2061395	rs2973226	C4orf19						0.96		1.3	1.39			1.39				1.11				1.05	0.81	2.38	0.85								1
SNP_A-2161684	rs2939717	C4orf19			0.96	0.64	1.07	0.78			1.02	0.59		0.54	1.18	0.8		0.92		1.56				0.74	1.7		0.68	2.18		0.74	1.84		1
SNP_A-2200857	rs2928297	C4orf19						1.15		0.91	1.67			2.21								1.01	0.99		0.93								1
SNP_A-2239402	rs2928313	C4orf19	1.01	1.12		1.12		1.05		1.08	0.81	1	1.08		0.81		2.22	0.91		0.86	1.35	1.12	0.96	1.02	1.17	1.15						1.1	1
SNP_A-4199737	rs11933940	C4orf19	1.11			0.78	0.65	1.09				1.04	1.19	1.64			1.03	0.88		0.8			0.85	2.23	1.07		1.16	1.34	2.12	1.84			2
SNP_A-8297520	rs2939748	C4orf19	2.09				0.97		1.23								1.39		1.03			0.8											1
SNP_A-8300055	rs2941002	C4orf19			0.96		1.23	0.89						0.89		0.87		1.01		1.45				1.2	0.88		0.93			2.43			1
SNP_A-8323883	rs1600394	C4orf19				1.17		0.79		1.1			0.9		2		1.03	0.98	0.99			0.96		2.03	0.93					1.57		1.52	2
SNP_A-8536966	rs6837361	C4orf19				2.53		1.14		1.24		1.1	0.6	0.95	0.87		0.96			0.51			1.08	1.41	0.82	0.72	0.93		0.65				1
SNP_A-8648687	rs1600392	C4orf19			1.02		0.93					1.02	0.94	3.01			0.88							2.33									2
SNP_A-8716735	rs1351302	C4orf19	0.81		1.02									0.98									2.59										1
SNP_A-1826574	rs2416811	C5		1.16	0.84	1.02			1.75	0.89	1.41		0.55	1	0.9		1.22			1.17	0.82	1.18	1.33	1.23			1.06	3.23		1.47	1.51	0.96	1
SNP_A-4300199	rs25681	C5		0.88	0.93	2.04			0.86	1.14	0.82		0.78	0.98	1.07		0.64			0.99	1.04	1.02	1.05	0.8			0.86	1.07		1.17	1.03	0.96	1
SNP_A-8285649	rs1035029	C5											2.04						1.05														1
SNP_A-8509717	rs7026551	C5		0.79					1.04						1.04												1			1.16	2.8	1.05	1
SNP_A-1982936	rs9326845	C5orf13								2.47																							1
SNP_A-2191325	rs168869	C5orf13				2.08			1.17				1.34		1.44	1.57			0.99	1.01	0.96		0.95		0.77	0.98		2.04	1.39				2
SNP_A-4265120	rs1494590	C5orf13							0.7	1.65		0.35								3.83	0.51		1.34		1.84	0.53	0.79						1
SNP_A-4265121	rs1494589	C5orf13	0.47		0.59			1.18	0.68	2.93		0.37				0.81	2.01				0.57				1.42					1.08		2.2	3
SNP_A-8666106	rs3822668	C5orf13			1			1.08	0.93		1.04	1.41			2.61	1.15		1.12	0.98		1.09			0.85	1.01				1.2		0.93		1
SNP_A-8666107	rs43180	C5orf13		0.9	0.9		1.82				0.79	0.84		0.99	2.25		0.69		1.04	1.14			1.24						0.98			1.2	1
SNP_A-1877187	rs13169783	C5orf25	0.65	0.75	1.59	1.63				0.96			1.55	1.44		0.82					1			2.36	1.23	0.85	1.45		1.08	1.35			1
SNP_A-8416513	rs4868630	C5orf25		0.97	1.04	1.27	1.14			0.99			0.82	0.65						1.11		1.48		3.08			1.08	1.13			1.13		1
SNP_A-8698663	rs10045424	C5orf33			1.11			1.03				2.01									1.02				1.08		1.02	1.3	1.02				1
SNP_A-1816774	rs981862	C5orf36	0.98	1.22	0.89		1.96		1.08	0.65			0.81		0.7			0.74		0.9	0.55	1.23		0.92			1.02	1.41	1.16		4.8		1
SNP_A-1855658	rs17083516	C5orf36	0.83						1.25						1.21						0.8			0.7	1.17	0.63					2.25	1.87	1
SNP_A-1946898	rs2160758	C5orf36	1.59		0.67			1.14		0.82		1.53						1.49			0.56	0.68	1.46	1.41		1.13	1.2	1.19	2.09			1.06	1
SNP_A-2295068	rs12188453	C5orf36			2.37		1.43										0.72						0.89										1
SNP_A-8481183	rs9686308	C5orf36	1.08	0.8	0.97				0.9	0.86	1.05		1.05		1.49			1.31			1.1			1.1	1.05			1.06			2.01		1
SNP_A-8545830	rs13182291	C5orf36	0.79		0.83		1.15									0.75		1.14	0.99	0.99		1.05	0.86	1.42				2.02					1
SNP_A-8713235	rs1861806	C5orf36			0.85			0.95	1.22		2.01	1.03	0.96	1.29							0.85	1.08	0.89	0.97				0.95	1.41				1
SNP_A-2049130	rs16903531	C5orf42	0.97					1.19		1.2	1	0.91	2.3		1.06	1.01					1.1							1.21					1
SNP_A-8371299	rs9996933	INPP4B			1.17		0.93							3.03						1.17	1.93										1.38		1
SNP_A-2089781	rs28126	C5orf44		0.96					2.39			1.12		1.41		0.87			0.97	0.89	0.91	0.8	1.09	0.97	1.38		1.14				0.97		1
SNP_A-2216375	rs910050	C6orf10							2.67		1.92			2.39	2.91							1.74	0.9	1.24		1.13	0.96	1.03		1.83	1.24	1.66	3
SNP_A-8544501	rs7753385	C6orf103	1.05			1.51			1.24		1.11	0.82					2.3				1.17	1.16		1.02	0.92						1.02	1.23	1
SNP_A-4299865	rs9368855	C6orf105		1.03		0.71			1.18					1.16									1.19	0.9	2.26				1.04	1.1			1
SNP_A-8448211	rs9348963	C6orf105			0.89		1.38					0.8		1.36		1.03				1.11		1.07				1.57		2.08	1.12	1.32	0.84		1
SNP_A-8635753	rs2235422	C6orf105																						2.08									1
SNP_A-8667475	rs210903	C6orf105			1.12					2.2				1.35		1.07		1.17		0.76		1.06						1.02	0.84	0.74			1
SNP_A-2225300	rs4714068	C6orf129		0.83	1.13			1.01				1.12	1.32	1.19		1.17	2.11	1.22	1	0.68		0.81			0.93		0.98	1				1.16	1
SNP_A-8338097	rs332569	C6orf138																									1.03			2.67			1
SNP_A-1858171	rs1325831	C6orf142		1.08										0.83	1.21		1.4		1.25	1.06										2.22		2.72	2
SNP_A-8667811	rs1280949	C6orf142			1.04					1.52				2.51			1.35	1.85	0.85														1
SNP_A-4247622	rs7740887	C6orf167		1.38	0.97			0.99					1					1.99	0.97		0.79	1.25				1.05	1.49	2.41			0.89	1.7	1
SNP_A-1958333	rs2455056	C6orf170												2.04			1.4			0.9	1.01	1.25											1
SNP_A-2061241	rs2995680	C6orf170												2.42			0.8			1.34	1.35	2.11											2
SNP_A-2084384	rs12717175	C6orf170	0.88	1.16			1.13		1.73					1.03	1.47	1.29	0.45			1.44			1.64	2.2					0.78	0.82	1.27		1
SNP_A-4211963	rs1080708	C6orf174		0.86	1.1					2.08		1.06			1.69			1.35		1.41		1.32	1.32		1.43					1.44	1.35		1
SNP_A-8670564	rs697470	C6orf176															2.47	1.37															1
SNP_A-2048931	rs9487325	C6orf186								1.19		0.96		1.83			0.83					1.94			1.08					2.59	0.9		1
SNP_A-8311995	rs2327647	C6orf217	1.06			1.65	1.35			0.97	0.61			2.31	1.43				0.88			0.78		0.78		0.68			0.54		0.76		1
SNP_A-8691408	rs4143205	C7orf10	0.65	0.85					0.86					2				1.02									0.94	1.02	0.74				1
SNP_A-4274644	rs34178	C7orf16					1.72						2.15		1.51				1.65			1.82							1.36	2.07	0.75		2
SNP_A-1878263	rs10236740	C7orf31								1.84		1		2.81		1.23	1.59	1.04				0.73		1.5	0.57	0.93				1.46	0.78	1.12	1
SNP_A-2257755	rs2523053	C7orf31	1.03			1.11					1.16				2.12	0.88	1.03	0.87					0.77		0.78	0.94			1.15	0.75	1.39		1
SNP_A-1814247	rs1100404	C7orf44	0.96			2.19		1.42	1.23	1.9	1.35			1		1.03		1.38					1.01					0.96		1.34	1.03	0.98	1
SNP_A-8716046	rs11766651	C7orf50	1.06	1.01	1.09	2.97	1.19	0.95	1.17		1.39			1.3			0.85	1.21			1.04	1.13		1.1	1.06	0.98	0.98	1.3		1.46			1
SNP_A-1827497	rs2536149	C7orf58									1.22										2.13												1
SNP_A-8700006	rs2952556	C7orf58							0.57				0.96												1.44					2.23		2.07	2
SNP_A-2072374	rs2040514	C7orf63						0.92																			1.28	2.94					1
SNP_A-2224863	rs3761804	C7orf63		0.89	1.24			1.09								1.38	2.09	1.2			1.08	1.53		1.74				0.99					1
SNP_A-8367472	rs6949578	C7orf67	0.88		0.77		1.24	1.03	0.94	2.51	2.44	1.03			0.96	0.52	0.92	1.27		1.54			0.58		1.44							0.9	2
SNP_A-8406083	rs7796100	C7orf67						1.11				1.37	1.48	2.1								0.84		1									1
SNP_A-8452628	rs12671080	C7orf67		1.04		0.72					1.31					0.73									2.12		0.71						1
SNP_A-8344732	rs9785119	C8orf79				1.17	1.97	1.36	1.81	1.46			1.57	2.59		1.32		0.89	1.7				1.45		1.21	0.95		1.38		1.41	1.58		1
SNP_A-8640074	rs2460345	C8orf79		1.01																1.06		0.85	1.14		0.92					1.28	2.13		1
SNP_A-2094367	rs279976	C8orf83	0.78		0.8				0.56	0.9		1.16	1.13	0.65	0.99			0.64		0.97		0.86	0.95	0.98		2.06			0.75		1.69	1.13	1
SNP_A-8280889	rs680754	C9orf102				2.24				1.14			1.23	2.12				0.96			1.07	1.28	0.91			1.27		1.42		1.01	1.14		2
SNP_A-1894927	rs16910302	C9orf130	0.86		0.83							0.94		1.17					1	0.92									0.94	0.75	2.19	2.75	2
SNP_A-1957389	rs17303045	C9orf130	1.02		1.55							2.01		0.93					0.93	0.81									1.27	1.45		1.28	1
SNP_A-8653601	rs7021905	C9orf135			1.47	2.25												1.4												0.94			1
SNP_A-1856015	rs10960809	C9orf150							1.77		1.04		1.27				0.72	0.8		1.66		2.04						1.21					1
SNP_A-8688238	rs7856384	C9orf150							2.22		5.32		0.76													1.44						1.43	2
SNP_A-8542025	rs6559921	C9orf153		1.25		1.35		2.37			1.95	0.82	2.83	1.93	1.71				1.72		1.98							1.09		1.85	0.83	1.39	2
SNP_A-8517163	rs7043224	C9orf24			0.76							1.39	0.89	2.91					0.76					0.88	1.27				1.33		0.79		1
SNP_A-1808104	rs10993344	C9orf3		1.25		2.23	0.85		1.11											0.93	1.02	0.83		0.77	1.02	1.41		1.23		0.98	1.06	1.02	1
SNP_A-1997257	rs380205	C9orf3								0.9	0.94	0.78	1.32				1.16		1		0.94	0.98		1.13				0.82		1.4	1.54	2.41	1
SNP_A-4286634	rs10175204	ACOXL	1.21							1.08	1.05			2.37			0.87			0.76	0.9		1.1			1.02					0.98	1.79	1
SNP_A-2178303	rs356143	C9orf3									0.72		0.97															2.39					1
SNP_A-8423680	rs10993359	C9orf3											0.93	2.17												1.16							1
SNP_A-8552402	rs10761368	C9orf3							0.89	1.2		1.08	1.39	1.22			2.66		0.96		1.21					0.93							1
SNP_A-4220969	rs3750552	C9orf61	1.47	1.04	0.95	0.9					1.07	0.88		1.3			1.19			1.5	1.16	1.24	0.98								1.72	2.09	1
SNP_A-4250258	rs10780321	C9orf61	0.72		0.49	1.56		0.8	1.36					0.69	0.79	1	1.16	1.42	0.84			1.06	0.7		0.67						2.04	2.2	2
SNP_A-8459243	rs6559495	C9orf61	0.68		0.66	2.22		0.48	1.48					0.7	0.76	1.1	2.58	1.57	0.84			1.18	1.37		0.93						1.34		2
SNP_A-2036981	rs3739642	C9orf68			0.76			0.44	1.33		0.66	0.57	0.56	0.25		1.03	0.71			1.34	0.73	0.52		1.13	0.49		1.27			2.19	0.62		1
SNP_A-2100264	rs3739643	C9orf68						0.54	1.01		1.07	0.63		0.64			0.78	1.64		1.01	0.72						1.29			1.41	1.04	2.08	1
SNP_A-8350127	rs9103	C9orf72		1.1	0.92	2.26	1.19				1.17																						1
SNP_A-1900959	rs6477842	C9orf84	1.09	0.61		2.22				0.99	1.13			1			0.85	0.68	0.77				0.79	0.9			0.9					1.44	1
SNP_A-8464532	rs215188	C9orf98								1.5	1.1				0.75	2.16	1.01	1.32						1.18		1.4		0.96	1.1				1
SNP_A-2075240	rs11869209	CA10	1.99				1.17	1.46		1.8	1.71				1.73		1.88	2.13		1.65	1.48						1.96	1.33		1.72		1.06	1
SNP_A-4245971	rs1389245	CA3												2.32																			1
SNP_A-4247575	rs7981156	CAB39L	1.04	1.38				1.11	1.33	1.07	1.27	0.96		0.98	1.51			0.98	1.11	0.94	0.95		1.63	2.34			0.89			0.9			1
SNP_A-2198790	rs8093359	CABLES1	1.09	0.92				1.02		1.16		0.98	0.91	0.91	1.12	0.82	2.16	1.12	0.89			1.09				1.22		1.46	0.88		0.96		1
SNP_A-8497414	rs4800149	CABLES1		1								0.84	1.26	2.04			1.42	0.96	0.98						0.93			0.88		0.95			1
SNP_A-8591396	rs4239437	CABLES1		1.08								1.38	1.52	2.46			2.06	1.32	1.32						1.05			1.38					2
SNP_A-8686663	rs8091699	CABYR				2				1.06				1.2	1.44	1.33	0.99		1.01			0.81	0.95					0.83	1.01			0.84	1
SNP_A-2219944	rs17126679	CACHD1																											0.91			2	1
SNP_A-1805359	rs2074879	CACNA1A					1.36	1.3	0.99		2.14	1.63	1.47		1.48		1.98			2.28	1.63					1.8	1.76				1.08	0.98	2
SNP_A-1815598	rs6559257	CACNA1B					0.65		0.73									1.43		1.08				1.05		1.89				2.32	1.62		1
SNP_A-1944651	rs3774429	CACNA1D								1.6	1.45																	2.91					1
SNP_A-4254881	rs2250736	CACNA1D			0.96	2.11		1.02					1.57			1.07	0.92				1.16	1.1		0.99	1.43		1.09	0.91	1.23		1.26		1
SNP_A-8600537	rs312481	CACNA1D			1.35						2.1	1.2												0.87	0.95					1.31			1
SNP_A-2091786	rs10910960	CACNA1E	0.82			1.22				0.66	1.01						0.81		0.55		0.91			1.23	2.24	0.97			0.95				1
SNP_A-4263808	rs3766987	CACNA1E	0.9	0.96	1.19	1.32				0.54	1.01										1.46		1.17	2.05		1.15	1.08		1.34			0.62	1
SNP_A-8523891	rs589082	CACNA1E		0.97			0.96			0.52		1.03			1		0.71	1.01			1.01	0.79	0.97	2.33		1.27	1.01	1.55		1.06			1
SNP_A-8618961	rs4651104	CACNA1E		0.97				0.76	0.65	0.63		1.06					0.96		1.07		0.85	0.88							1.08	2			1
SNP_A-8619072	rs10494539	CACNA1E		1.04				0.68	0.33	2.51		1.43					1.15		0.98		1.02	1							0.53	3.98			2
SNP_A-8619074	rs494288	CACNA1E		0.82				1.25				1.53						1.11				1.02		0.94	0.81	1.44	0.97			4.21		0.45	1
SNP_A-8619096	rs3856094	CACNA1E	2.02	0.8						0.74	0.86										0.61												1
SNP_A-8458529	rs12936750	CACNA1G								1.27																2.18					1.81		1
SNP_A-1883898	rs10231240	CACNA2D1							0.84				1.68				0.8			1.39				2.01		0.93							1
SNP_A-8294343	rs17834782	CACNA2D1						0.99					1.51	1.11	2.01					0.88		1.07							1.96				1
SNP_A-8310187	rs2237517	CACNA2D1			1.46						2.41								1.21			1.13											1
SNP_A-8315713	rs6964888	CACNA2D1	1.07							0.89	2.38					1.07				1.16		1.09							2.32				2
SNP_A-8356326	rs17240387	CACNA2D1			0.86		1.66				1.43		0.52	2.92			1.56			3.25	0.95					1.39		0.9					2
SNP_A-8543318	rs17834350	CACNA2D1												2						0.7					1.14								1
SNP_A-8682093	rs258683	CACNA2D1		0.95	1.01	0.49		1.08	1.31	0.88	2.22		1	1.07	1.08	1.01	1.05				0.92	0.97	0.88			1.28			0.62			1	1
SNP_A-4290580	rs916217	CACNA2D2											2.15																				1
SNP_A-2029721	rs4928028	CACNA2D3						1.22					2.16				0.81													0.94		0.93	1
SNP_A-8696859	rs3773544	CACNA2D3		0.74				1.19						1.3							1.34						0.86	0.68				2.49	1
SNP_A-8358830	rs11014175	CACNB2	0.62		1.21	5.16					1.14			0.72		0.87	1.24					0.83					0.82						1
SNP_A-8506948	rs4145903	CACNB2				3.61																0.97											1
SNP_A-8709067	rs7088091	CACNB2			0.98	2.03	1.19	0.92				0.92			1.01	1				1	1.07	1.14			0.94	1.05		0.89			1.31	0.85	1
SNP_A-8309583	rs16830498	CACNB4	1.35	0.71		2.21			0.99		1.38			1.52	1.08		1.36		1.6	1.19			1.58	1.22	0.85			0.93		0.85	0.96		1
SNP_A-8574180	rs12992504	CACNB4	1.57			0.65			1.17	0.79			0.97		1.16			1														2.4	1
SNP_A-8440526	rs2107118	CACNG3	0.99	0.78	0.68			0.84		0.76		3.92	0.59		0.94			1		0.95	0.76						0.83		0.92	0.57		0.67	1
SNP_A-8587358	rs11860647	CACNG3					1.63		1.28		2.28	1.7	2.04	1.94				1.65		2.11		1.19	1.33		1.16		3						4
SNP_A-2092946	rs11601041	CADM1							1.14	0.92						2.77				0.91				2.3	0.71							0.79	2
SNP_A-2273658	rs7482812	CADM1	0.66					0.75		1.14	1.26		1.54		0.99					0.76				3.14					0.92		1.38		1
SNP_A-8366767	rs7952231	CADM1	1.27	0.82	1.82	1.57						1	0.83			2.17		1.92				1.05	1.05			0.89	0.83		0.82				1
SNP_A-1792736	rs2324974	CADM2													2.75																		1
SNP_A-4209581	rs6799453	CADM2							1.26					2.09		1.7										1.12			1.8				1
SNP_A-8386306	rs11706594	CADPS				0.73	1.07	0.89		0.97														2.87	1.22		1.44	1.09			0.76		1
SNP_A-1836201	rs916982	CADPS2	0.82				0.79				1.05		1.28					0.86	0.9			0.86		0.58					1.34			3.02	1
SNP_A-1862729	rs41513151	CADPS2	1.04		1.56						1.11		1.08		0.97	0.95		0.87		2.06	1.03	1.32				0.92	0.74					0.87	1
SNP_A-1884324	rs2430024	CADPS2				1.23						0.81									2.22												1
SNP_A-1991084	rs2430022	CADPS2		0.85		2.39						1								0.87	1.15							2.13		1.45	0.99		2
SNP_A-1991087	rs17144752	CADPS2										0.92	0.53							0.73								2.09		1	0.94		1
SNP_A-2055649	rs12670456	CADPS2							2.92										0.74			1.47											1
SNP_A-2105711	rs10268918	CADPS2				2.07																											1
SNP_A-2311090	rs3757536	CADPS2							2.08		0.83	0.99		1.12			0.96		1.09			1.4							2.41	2.36			3
SNP_A-8296216	rs11769021	CADPS2	0.77		0.81	1.65			3.54	1.33	1.82	1.08						1.86			0.97	1.14	0.83		0.78	1.58				0.98			1
SNP_A-8304119	rs37911	CADPS2	1.34													2.7			0.83				1.07	1.13									1
SNP_A-8387831	rs6962249	CADPS2				2.98					0.71		0.78						0.89			0.86											1
SNP_A-8507471	rs1154609	CADPS2			1.61						0.56	1.09	0.76		0.99	2.1		1.25	1.48	1.26	1.43	1.26		1.05		0.59	1.16		0.92			1.01	1
SNP_A-8669040	rs9641685	CADPS2				1.57	1.14				0.88			1.21			2.47		0.59			0.82						0.58	0.91	0.79			1
SNP_A-8684325	rs1010497	CADPS2		0.69							2.4	0.81	1.27							0.89		0.92	1.11				1.22						1
SNP_A-1781560	rs3821182	CALCRL	1.25		1.16	2.07	2.13				1.06	2.12			1.4			1.13	1.31		1.1	1.15	0.9					0.41	1.07			1.26	3
SNP_A-1873553	rs3815524	CALCRL													2.11																		1
SNP_A-1956693	rs840617	CALCRL		0.88						0.89		0.8		1	1.25	0.76		1.05	1.15		1			1.27				2.58				1.53	1
SNP_A-2227500	rs1706287	CALCRL		0.75						1.31		0.91		1.28	3.1			0.97	0.99		1.9			0.69				1.64				0.96	1
SNP_A-4262437	rs2882203	CALCRL			0.85			1.71	1.11					1.13	1.02									1.37	1.53						2.22		1
SNP_A-1991369	rs1452912	CALD1			0.91					0.94										1.03	0.91	1.01	1.14	1.01		1		0.99	0.86	1.07	2.32	1.29	1
SNP_A-2039110	rs3778851	CALD1		1.21													1.05			1.51	0.89			2.09		1.36		1.07	0.79	0.84	1.21		1
SNP_A-2201244	rs3800717	CALD1																												2.58	1.05		1
SNP_A-4219595	rs1869260	CALD1																											2.64				1
SNP_A-4224832	rs6956447	CALD1				1.14								3.37																			1
SNP_A-8404250	rs4732070	CALD1											0.96			1.32	0.78		2.17		1.18				1.32		1.29						1
SNP_A-2260171	rs10260420	CALN1	1.3		1.2							0.89				1.61	2.12	1.38								0.75		0.84					1
SNP_A-8427144	rs6946380	CALN1		0.86	1.42				1.67	2.32	1.15				1.15	1.79			2.08		1.9							0.83			1.41		2
SNP_A-8281045	rs2060717	CALU	1.15			2.23	0.86			1.02	1.31		0.98	1.34	1.07	1.19							0.98	1.18					1.43	1.04			1
SNP_A-1807273	rs7912882	CAMK1D		1.03			1.01					1.52		0.84					1.01	0.88	0.77	1.37	0.83	0.88				2.03	1.14	0.71			1
SNP_A-8377410	rs10754824	NID1		0.84																2.39							0.85		1.06			0.92	1
SNP_A-8348419	rs2989500	CAMK1D	1.01		1.03			1.05	2.16	0.84		1.65		0.98			1.01	0.92	1.04		1.16	0.97	1			1.57		0.98	0.97	1.09	0.89		1
SNP_A-4261226	rs9482771	RSPO3					2.08	1.08			1.1	0.68	1.2			1.02		1.03	1			1.97	1.72					1.09	0.87		0.71		1
SNP_A-8524783	rs6027437	LOC100131710	1.03								0.79	0.66		2.49							0.8	0.93											1
SNP_A-1978584	rs6836139	CAMK2D	1.04			1.72		0.99			1.1				2.42			1.01	1.14	1.01	1.02					1.05			0.95		0.78		1
SNP_A-2194314	rs1047187	CAMK2D	1.48	0.78		1.66		0.83	1.09	2.76			0.81	1.05		0.77			1.39		1.09								0.9				1
SNP_A-2289715	rs2107172	CAMK2D			1.02			1.19	2.34	1.05	0.86				1.07				1.13		1.02			1.26				0.74	0.93	1.78	0.8		1
SNP_A-4203624	rs6826859	CAMK2D		1.03						2.31			1.2		0.75	1.29			0.9		1.06	1		0.96			0.8		0.77		1.19		1
SNP_A-4228595	rs1859152	CAMK2D	1.02			1.08			1.15	2.35	1.26				1.07		1.22		0.91		0.98			0.95			1.11			0.98	1.16		1
SNP_A-4252491	rs28599641	CAMK2D	1.52			2.3		1.08	0.92					0.93								0.93		1.58			0.99		0.76				1
SNP_A-8663295	rs916874	CAMK2D	0.95	0.71		0.97				1.05			1.03	1.34	2.29	1.42			1.53		1.01	0.9		1.22				0.87			1.19		1
SNP_A-1982917	rs306079	CAMK4	0.88			1.15					1.02	2.44			1.61	1.39	0.88	1.02				0.89			0.82			1.53			0.86	2.56	2
SNP_A-8656721	rs10066487	CAMK4			0.99		1.31	1.14	1.25	1.03			1.01		0.96	0.7		1.09	1.01			1.02			0.84	1.08	1.15				2.32		1
SNP_A-8330751	rs2686346	CAMKK2		0.99	0.82			1.07			2.09				1.82			1.44					0.86				0.75		1.01	1.6			1
SNP_A-8423906	rs16847251	CAMSAP1L1																				1.01				1.05		2.43		0.94		0.69	1
SNP_A-1829589	rs1476047	CAMTA1	2.52	0.84	1.63				1.01		0.67					0.62								2.34			0.96	0.64					2
SNP_A-2147740	rs6577428	CAMTA1	2.12				0.83	1.52		1.31	0.92		1.18				1.54					0.8			0.85		1.58	0.89			0.88		1
SNP_A-4257338	rs4908612	CAMTA1			1.03		2.03	1.05					0.85																				1
SNP_A-4268029	rs6577395	CAMTA1													2.23									0.99							1.04		1
SNP_A-8344132	rs11587880	CAMTA1								0.86			1.02	2.15						0.82	0.77	1.07						1.44	0.55	1.52			1
SNP_A-8469241	rs7514988	CAMTA1	2.03		1.12	1.26			2.31	2.2	0.97					0.64								0.91	0.93		0.7			1.21			3
SNP_A-4286509	rs1252402	CAND1	1.02			2.26		1.05	1.75		0.99	0.94					1.21				0.98	1.02			1.25							1.54	1
SNP_A-1891899	rs9350045	CAP2				1.3																			1.04	2.34	0.75		1.49				1
SNP_A-8644374	rs2478546	CAPN9	1.53			2.19		1.51		2.76		0.96	2.36					1.41				0.82	1.05		1.06	0.82	1.13	1.17	0.88				3
SNP_A-8497136	rs10734793	CAPRIN2		1	0.9	1.04	1.03		1.03		0.92	0.98	0.76	0.88	1.2	0.77		1.26							1.49			1.97	3.41		2.27		2
SNP_A-4194479	rs7296952	CAPS2				1.03				0.85	2.01	0.85			1.17			1.23	1.12		0.98			0.87		0.68	0.58			1.05			1
SNP_A-8319671	rs11835996	CAPS2				1.03																		0.56						2.08			1
SNP_A-8533248	rs12076902	CAPZA1											0.91		1.13					1.27				1.06					3.94				1
SNP_A-1789152	rs924519	CAPZB		0.99	1.01	2.04		0.91	1.02	0.94	2.09	1.04		1.15					1		1.09		0.87			1.05					0.99	0.9	2
SNP_A-2237517	rs11583187	CAPZB					1.22		0.89		1.34				1.21				0.93		0.99	1.05	1.14	0.98		0.99		2.11	1.26			0.43	1
SNP_A-8628074	rs7798425	CARD11	0.95						1.33	0.97						0.89	2					1.08		0.79	1.28	1.38	1.04					1.17	1
SNP_A-8414069	rs2066964	CARD14					1.33		2.54				1.1		1.27					0.84	1.22				0.97	1.02					0.97		1
SNP_A-8422856	rs323566	CARD6	0.88			2.86								1.02				1.03	1.16	0.95				1.16	0.89								1
SNP_A-8360043	rs17097314	CASC2						1.34	0.68	1.39		1.02				2.57	0.92					2.37	0.81		0.78			0.6					2
SNP_A-8409497	rs2705897	CASP3		1.63							1.22		0.8	1.23	0.99	2.15	1.1	1.13		1		0.89		0.74								1.86	1
SNP_A-4238639	rs2282658	CASP5										1.29				0.83	1.17			1.74										2.27	2.21	0.88	2
SNP_A-8387232	rs2282657	CASP5														0.52				1.17										2.87			1
SNP_A-8513751	rs507879	CASP5		1.15												0.5	0.98	1.02		1.36										3.3	1.83	0.52	1
SNP_A-8517124	rs4497356	CASP7				2.1	0.96					0.8		1.21	1.23		0.94								0.99				0.81	1.12		1.34	1
SNP_A-4196910	rs6723097	CASP8			0.88	1.27	1.07			1.1	0.97				0.95	1.28	1.13		0.92						1.11	2.13	1.16		1.01				1
SNP_A-8478209	rs6745051	CASP8			0.99	2.13				0.91				1.12	1.26											1.15				0.98	1.15	1.08	1
SNP_A-4224440	rs2202127	CASR	0.9				0.57								1.02		1.26				4.5			1.39			0.9						1
SNP_A-4252373	rs729949	CAV1	0.74					0.66			1.34	1.23				0.87				0.98	1.55		2.34	1.36									1
SNP_A-8504375	rs237878	CAV3	1.26					1.16				2		1.56	1.71		1.52	1.07		1.26	0.93	0.85				0.89					1.53		1
SNP_A-4295051	rs7094058	CBARA1											2.45	1.46						0.97						0.59				0.88			1
SNP_A-8375373	rs16929939	CBARA1					1.04				1.22		1.01											0.93			0.8	0.94			2.82		1
SNP_A-8613992	rs12777437	CBARA1			0.8								0.64	2.2						1.11						0.99				1.71			1
SNP_A-2269180	rs209677	CBFA2T2			1.08	1.24				0.91			1.1	1.18	1.26	1.06	0.95	1.18	1.09	0.91	1.12	0.98	0.97	0.87				2.04	1.04				1
SNP_A-1788632	rs16851413	CBLB					2.51	1.39		1								1.75		1.26					1.07			1.18					1
SNP_A-4248830	rs9838755	CBLB					1.74			2.52				0.72	0.81		1.28							1.07		1.09	0.76		0.89	0.53		0.79	1
SNP_A-8619221	rs1550711	CBLB		0.97		2.04					1.06	1.15			0.93			1.26	1.03				0.98		1.2				1.15		1.16		1
SNP_A-2308009	rs16892112	CC2D2A	1.17							1.11					0.95	1.27	1.07			0.89		0.88			1.1		0.94			3.46			1
SNP_A-8329381	rs1861044	CC2D2A	1.1			0.62	0.78							0.95	0.97			1.17							1.11					1.02	2.49	1.44	1
SNP_A-8358661	rs9998686	CC2D2A	0.84							0.65					1.19	1.08			1.79	0.46		0.76					1.34	3.15					1
SNP_A-8288075	rs11188557	CC2D2B	0.98	0.87	0.94		0.89						0.95	0.89				0.88		0.82		1.34	0.69		0.87	1.1	0.98	2.09			1.61		1
SNP_A-4256926	rs10503032	CCBE1		0.78						0.44	1.22	0.93			0.55	0.88		2.79	0.72		0.57		0.67	0.52	0.8	1.1	1.23			0.72	0.38	0.59	1
SNP_A-8495467	rs3809990	CCBE1						0.84	2.38																								1
SNP_A-8521613	rs7238043	CCBE1							0.78	0.81												1.1										2.37	1
SNP_A-1809473	rs666498	CCDC102B	1.15		1.07	1.24			1.21	0.99	1.03	1.01	1.29	1.07						0.67				1.17	1.13	1.25	1.38	2.91					1
SNP_A-1814008	rs12960609	CCDC102B	0.57			1.54					1.07		1.36	1.64		1.44	0.67			1.35				0.86	0.62	1.09		2.9					1
SNP_A-1873993	rs1893438	CCDC102B						0.77	1.68	0.87		0.72	1.5	1.97		2.12	1.05	1.16				1.14					0.69	1.13		0.93			1
SNP_A-1884937	rs9954425	CCDC102B									1.22													2.46									1
SNP_A-1909425	rs590974	CCDC102B									2.1		1.6		1.25							1.38				1.47							1
SNP_A-8702716	rs6897283	C5orf42																			2.41												1
SNP_A-1938047	rs17079710	CCDC102B			1.33	1.77			1.27	1.32	0.97	1.12		1.04	0.86	1.57	1.26	1.02						0.77	1.18	0.99	1.24	0.6				2.1	1
SNP_A-2052288	rs874739	CCDC102B			0.94													1.06	2.27				0.86										1
SNP_A-2190049	rs9949988	CCDC102B	0.96		0.74	0.55		0.9	0.61				0.82	0.57		1.19		0.7				1.56		2.15	0.63	0.69	0.93	0.63	0.74				1
SNP_A-4216661	rs988525	CCDC102B	1.12		1.23	1.49				1.17	1.04	0.98	1.02	0.96		1.21	1.06			1.48				1.46	2.34	0.87	1.17	0.96			1.23		1
SNP_A-4218826	rs4539705	CCDC102B	0.84					3.19	0.89		0.98		1.85		1.12			0.98	0.4			1.48		0.82	1.08	0.85	1.26	1.29	1.18				1
SNP_A-4257824	rs10503122	CCDC102B												2.29							1.28	0.76											1
SNP_A-8370572	rs1477987	CCDC102B									0.91		0.65		0.92							2.08											1
SNP_A-8634178	rs17236101	CCDC102B									2.33		1.04	1.11	0.83	1.01					1.15					0.99							1
SNP_A-8691427	rs12052005	CCDC102B			0.77	1.26			0.93	1.16		0.77	0.44			1.24	1.38	1.06			1.42			1.07	1.02		0.57	2.72				1.51	1
SNP_A-8401326	rs11098036	CCDC109B	1.02	1.07				1.67	2.32				1.27			1.63		1.99	1.33		2.31	1.09	1.19		1.06		1.6		1.38	0.79			2
SNP_A-8675543	rs6815377	CCDC109B	1.02	1.09				1.07	0.97				2.04			1.26		0.74	1.04		1.01	0.58	0.9		0.87		0.96		1.05				1
SNP_A-2180978	rs12708994	CCDC113	0.98	1.07			1.11			1.12		2.1		1.75		1.53	1.4	1.04			1.68				2.14	1.84		0.88	1.11		1.27	1.71	2
SNP_A-2038422	rs38332	CCDC129				0.69					0.99		1.14		4.51	0.75											1.28					1.09	1
SNP_A-4279242	rs10276592	CCDC129							2.09			0.91																					1
SNP_A-2073577	rs3095465	CCDC146			1.05		1.17		2.28	1.3	2.1	1.06			0.9	0.93	1.07			2.14		1.65		1.29	0.76	0.92	1	0.64		0.81			3
SNP_A-2075403	rs4463350	CCDC146				1.19		1.03																1.42		1.09		1.29			1.03	2.29	1
SNP_A-2177110	rs3114317	CCDC146		0.93						0.64	1.16				2.35	0.97	1.52		1.27			1.17		1.01	1.21								1
SNP_A-8682914	rs3114324	CCDC146	1.07	0.82	1.17	1.28		1.15	2.49	0.93	1.54				1.86	0.98					1.31	0.64			1.08			0.9			1.04		1
SNP_A-2130179	rs7908698	CCDC147			1.2				1.09							2							1.48	0.76	1.56					1.63		1.74	1
SNP_A-8680723	rs7082919	CCDC147			0.97					2.5																							1
SNP_A-1886946	rs11895535	CCDC148				0.61	0.97		1.18	1.76					1.27	1.64	1.97		1.21		2.07	0.96			1.17	1.12	1.62						1
SNP_A-1965539	rs9288709	CCDC148		0.81							1.38				0.8						2.13			0.46		0.76	0.81	0.74				0.64	1
SNP_A-2267610	rs6720852	CCDC148								0.62	1.14						0.92				0.77	2.02		0.8			1.12						1
SNP_A-2276818	rs16856309	CCDC150																						1.02								2.79	1
SNP_A-4196898	rs1879127	CCDC150							2.93								1.17	0.74							1.04					1.35			1
SNP_A-8531731	rs8113620	CCDC155						1.09			0.99	3.54						0.96		1.09													1
SNP_A-1953806	rs6989497	CCDC25	1.09	1.14				1.11		0.83					1.37					1.27	1							2.16		0.75			1
SNP_A-8280689	rs725361	CCDC25											1.16	2.13		0.99										1.17			1.29		0.97	1.21	1
SNP_A-8397201	rs10906261	CCDC3				0.96			0.95		1.12		0.88			0.86		1.05	2.08				1.67		0.85	0.91			0.94	1.3	0.99		1
SNP_A-8446049	rs7072083	CCDC3																												2.03			1
SNP_A-8467351	rs10906260	CCDC3											1.08						1.26				2.35			0.57							1
SNP_A-4225230	rs189499	CCDC33		1.22		0.53	1.55	1.17			1.81	1.59	0.84			2.14	1.82		1.48		1.35	1.25	1.12		1.18				1.11				1
SNP_A-1822710	rs1583518	CCDC38										0.95										0.78					0.77					2.92	1
SNP_A-2088606	rs10507064	CCDC38				1.12				1.4		1.12			1.21			0.94	0.88			1						0.96	1.01			2	1
SNP_A-2092226	rs2117914	CCDC38	0.81															1.01						1.3	1.1		1.11			2.22			1
SNP_A-2196560	rs10745735	CCDC38			0.98					1.15	0.91	0.79			1	0.83			1.12		1.85	1.92										2.4	1
SNP_A-1867617	rs10512508	CCDC46																													2.07		1
SNP_A-8293727	rs232145	CCDC46			1.38					2.22			1.17	1.62	2.09							1.12		0.89			0.88						2
SNP_A-1801862	rs2291501	CCDC66	1.13			2.18	0.98	1.05		0.88		1.1			1.45				0.81		1.11				1.41	1.02		1.2			1.14		1
SNP_A-2120303	rs977255	CCDC67		0.88		2.11	0.66	0.55			1.03	0.65	1.24	0.68		1.05		1.29		0.86		0.82			1.3		1.93	1.1	2.91	0.9			2
SNP_A-2179705	rs12286814	CCDC67		1.29							1.66	0.87		1.92		1.01				1.95								4.29					1
SNP_A-8535400	rs12287849	CCDC67		0.94		0.9	1.02				2			1.21		0.79						0.88			0.78			0.94					1
SNP_A-8604243	rs11020308	CCDC67			1.06											2.36																	1
SNP_A-8558714	rs16933379	CCDC7	0.89								2.31			1.33										0.96									1
SNP_A-2078584	rs9736074	CCDC73				2.1						0.99																			0.86		1
SNP_A-8631606	rs7933005	CCDC73				2.02						1.14																			1.24		1
SNP_A-4287403	rs12733952	CCDC76										1.07			2.1					1.01	0.86												1
SNP_A-2032249	rs735295	CCDC77						0.73			0.82								1.46	2.07						0.88	1.08		1.26				1
SNP_A-2012964	rs7118035	CCDC81		0.54		0.32	0.54	0.66		0.6	0.88															1.49	2.3					1.14	1
SNP_A-1858056	rs1990758	CCDC85A																								2.46							1
SNP_A-8574870	rs13021782	CCDC85A				0.72						0.94					0.74	0.66				1.11				0.84					2.22		1
SNP_A-2312088	rs1285838	CCDC88C		0.85	0.76	0.98	0.94	1.3	0.86	0.82	0.87	2	1.05					0.82				1.05	1.06	0.78		0.65	1.21	0.81	0.76		0.81	1.1	1
SNP_A-1921057	rs12305750	CCDC91	1.13		0.93						1.23			0.86		1.29		1.03		1.24		1.08	1.02		0.92			2.13	1.32	0.96			1
SNP_A-2110270	rs11049656	CCDC91											1.35								1.16	1.38				2.03	1.03	0.97					1
SNP_A-8653032	rs11049559	CCDC91	0.96		1.05		0.74				1.14					0.86		0.94							1.05			2.03	1.08	1.12			1
SNP_A-1785932	rs264002	CCNB1IP1			0.8								1.43						1.09					0.99					2.69	1.56			1
SNP_A-8416721	rs3093023	CCR6	1.13	0.79			1.09	1.37	1.05		1.77			2.02				1.48	1.69				1.73		1.14	0.76	1.16	0.88		1.86			1
SNP_A-1941316	rs2244964	CCT5				1.34		0.82						2.16								1					1.55	1.08					1
SNP_A-1832413	rs7751523	CD109					0.57	0.82	1.22		0.98	0.7	0.82	0.64					0.99	0.85		1.19	0.71					2.26		1.7			1
SNP_A-1866800	rs9446997	CD109	0.92			1.2		0.88			0.98	1.38	1.18	0.88	1.07		1.71	1.12				0.82	1.17			2.07		0.86		0.77			1
SNP_A-2166965	rs16884120	CD109				2.8	0.66	0.61			1.03		0.62	0.39			0.94						0.64	0.93			1.02	1.47		1.45			1
SNP_A-8690333	rs9556131	GPC5					0.74			0.75		1.33						1.01	0.98	1.34	1.23		0.97				0.86	2.06		1.3			1
SNP_A-8354934	rs9447033	CD109	1.05		0.95		1.06	0.77			1.06	2.03	1.04	1.04				0.85	0.95		0.78	0.96	1.04				0.82			1		0.95	1
SNP_A-8520123	rs3005482	CD109	1.06		1.28		0.71	0.66	0.94	1.1	1.26	1.51	1.56	4.18							1.07		0.99			1.51				0.93		0.82	1
SNP_A-2312753	rs5744507	CD180											0.78			2.47				1.4					1.29				1.88				1
SNP_A-4209663	rs10511311	CD200	1.03		0.91				0.92					1.38		0.88	1.15				1		1.02	0.91				2.1				1.01	1
SNP_A-8446589	rs9990216	CD200	0.74		0.97	3.16		1.02		1.29	1.02	1.33	0.76	0.76	1.12		1.41					1.12		0.99	0.95		0.97	0.81	0.98		1.13	1.23	1
SNP_A-8677901	rs9867544	CD200	1.13	0.94	1.09	1.07	2.15		1.15	3.46	1.09		1.02	1.72		1.14													1.64				2
SNP_A-1878061	rs2141347	CD200R1	1.15	1.21					0.81	1.91												1.58	1.02		1.84			2.09	1.39				1
SNP_A-2008990	rs1466873	CD200R1	1.14	0.84					0.9	3.11												1.26	0.94		1.7			1.02	1.29				1
SNP_A-2076243	rs6941555	CD2AP			0.83					1.24		1.06	0.77	0.85		1.18					1.16	0.79	1.04					1.07	1.18	3.62			1
SNP_A-4216200	rs2275446	CD2AP		1.18	0.93				3.35	1.34		1.1	0.7	1.33		1.03					1.41	0.94	1.12					1.11	1.1	1.51	1.5	1.27	1
SNP_A-2059891	rs16892441	CD38			1.05	0.91		0.79		1.12			1.22																1.19	2		0.81	1
SNP_A-2211640	rs7667590	CD38	1.02	0.92		2.07		1.14	1.06	1.01			1.2						1.11		0.85								1.54	1.01	1.12	0.99	1
SNP_A-8337112	rs4580644	CD38	1.03					1.13	0.76	0.8			0.65						0.92		0.74								1.11	2.12	1.31	1.1	1
SNP_A-8394367	rs10128586	CD44	1.38				0.94			2.09	1.33					1.55					1.45						1.06				0.98	1.03	1
SNP_A-4304084	rs17827795	CD47				1	2.05		1.39			1.29														1.65			0.8	1.04			1
SNP_A-1811007	rs2863107	CD82		0.92			1.66	1.01								4.38		0.98					1.02			0.89		1.18	0.9		1.03	1.09	1
SNP_A-8344312	rs4764543	CD9																								1.06						2.58	1
SNP_A-1959995	rs2276872	CD96						0.88	2.56					0.66													0.95	0.78					1
SNP_A-2234283	rs16858280	CD96						1.42	3.48					0.92													0.96	1.28					1
SNP_A-2261802	rs818202	CDA												1.88						2.24		0.82		1.4									1
SNP_A-1902535	rs10875290	CDC14A					4.43									0.78	0.57	1.24	0.77					1.24								1	1
SNP_A-4298451	rs10272641	CDC2L5	0.94	0.89	1.07	2.58		1.06											0.91	0.87	0.96	1.09	0.94	0.9	0.82	0.86				1.05			1
SNP_A-2078490	rs7254474	CDC37					1.39												2.42		1.74							0.98					1
SNP_A-1987070	rs7518813	CDC42BPA																			1.32	0.94								2.13			1
SNP_A-4220778	rs2104863	CDC42BPA																1.04						1.02				2.1			0.68		1
SNP_A-8666721	rs1320490	CDC42BPA	1.07			1.42	0.99			1.42		1.09						2.08	1.08	1.18		1.12						1.51	0.98				1
SNP_A-8452810	rs1071577	CDC42EP4					1.49			2.07	0.93			1.05		0.96	1.15	1.22		1.26	1.26	1.23	1.44	1.2		0.9	1.37		1.27	0.51	1.48		1
SNP_A-1905635	rs13447530	CDC7						1.09		0.98															2.1								1
SNP_A-2160003	rs3816061	CDCA7			0.78								0.93	0.92		1.12									2.44								1
SNP_A-1959255	rs12700327	CDCA7L	0.94		1.16	3.38			0.87	0.88		0.87	1.19	1.04										1.08	0.83		0.87	1.06	1.34				1
SNP_A-8677668	rs7798564	CDCA7L	0.85		0.76	3.02			0.82			1.14	0.91	2.51						1.19			0.77	0.97	1.4				1.65	0.88			2
SNP_A-8716116	rs4566940	CDCA7L	0.8		1.12	3.82			3.13	1.26		0.73	0.92	1.37										1.19	0.71			1.82					2
SNP_A-1820067	rs6773050	CDGAP		0.74	0.81	2.06						0.99		0.96					0.94		0.68	1.12					1.09	0.74	0.72		1.07		1
SNP_A-8628699	rs2195431	CDH11			0.83																				2.35								1
SNP_A-1850636	rs10941965	CDH12		1.04			1.22	1.7	1.21				1.12				1.06	1.64			1.79	0.77	1.56	2.03			1.31		0.94				1
SNP_A-2028302	rs1825792	CDH12		1.34			1.87	1.66					2.17				1.29	1.41			2.36	0.88	0.96	1.17		1.21	1.34	0.94	0.82				2
SNP_A-2032533	rs7723664	CDH12													2.57										1.85	1.39					2.48		2
SNP_A-8663692	rs2044281	CDH12				2.7																											1
SNP_A-1816977	rs8055902	CDH13								1.67																				2.15			1
SNP_A-1826414	rs2325834	CDH13				0.76					2.07								0.92														1
SNP_A-1919144	rs4783307	CDH13									2.39																						1
SNP_A-4246757	rs1364118	CDH13			4.27														1.1														1
SNP_A-4294140	rs7205401	CDH13									2.85																						1
SNP_A-4295035	rs9932137	CDH13																											2.22				1
SNP_A-8393475	rs9930490	CDH13									1.94									2.5													1
SNP_A-8488904	rs9929756	CDH13											1.36				1.2															2.21	1
SNP_A-8508618	rs1035535	CDH13						1.05					0.93		2.21						0.91	1.02			1.05		1.18						1
SNP_A-8622151	rs11860282	CDH13																											2.12				1
SNP_A-8326264	rs10961466	NFIB	0.75			1.27	2.79				1.11			1.2		1.24	1.1	1.27												1.05		0.92	1
SNP_A-8378527	rs1352199	CDH18				2.96																											1
SNP_A-8645020	rs11258005	CAMK1D		0.56	1.01		1.05				1.22			2.22									1.02					1.43					1
SNP_A-8385968	rs1148378	CDH2		0.86	0.79			0.91		0.84	1.4			0.77				0.62	1.87						0.85	0.97			2.77				1
SNP_A-8480330	rs1015847	CDH2		1.51	2.16			0.92		1.08		1.51				1.47			0.88			0.76	0.89	1.01					1				1
SNP_A-2024938	rs521515	CDH20	0.96		1.03		0.98	1.01			0.95		1.05	0.96	1.07	2.29	1.04	1.04	0.96					0.99	0.99			0.95	1.07		0.96	1.06	1
SNP_A-1956938	rs1557184	CDH4	1.07	1.32	1.05	1.07	2.21	2.35		2.52					1.68	1.33			1.11	1.69	1.74		1.15	1.03	1.31	1.33	1.31	1.24			2.29	3.86	5
SNP_A-1968917	rs6061845	CDH4						0.86	1.01		0.91		1.22			1.51	2.07	0.86	0.85	1.05				0.96	0.94		0.82	1.06	0.95		0.65	0.98	1
SNP_A-1856803	rs7187101	CDH8											2.44															0.95					1
SNP_A-8681325	rs16963935	CDH8		1.36	1.05					1.46		1.14			1.76		1.49	1.03	1.43									1.2	2.26	0.99			1
SNP_A-8566856	rs6874394	CDH9	1.36	0.83	1.14			2.04	1.27	1.08	0.94			1.01		1.18	1.79			1.02	1.46					1.05		0.74			1.14	1.63	1
SNP_A-2307108	rs10739568	CDK5RAP2	1.09		0.92	1.11													1.2	1.18		1.05			1.03	1.06		1.13	1.03		2.08		1
SNP_A-2154595	rs620267	CDK8		1.06	0.67	1.37	1.27		0.9	1.63						0.88		0.97				0.97		0.88	1.01			2.38			1.83	0.86	1
SNP_A-1808248	rs2446484	CDKAL1						1.08		1.69	1.05						2.66	1.09	1.09	1.47				1.62	1.22	0.97	0.98		1.41	2.5			2
SNP_A-1923579	rs7767391	CDKAL1	1.42		0.62				0.94	2.04			1.15		1.11								1.71		1.25								1
SNP_A-2238681	rs4645410	CDKAL1				1.42	1				1.19		0.87										1.05			0.88		1.33		2.18		1.1	1
SNP_A-4211564	rs2015426	CDKAL1	0.76			1.3				1.28															1.16	1.2		2.46		1.13			1
SNP_A-8293169	rs11969587	CDKAL1					2.52						1.21						0.87		0.8							0.9					1
SNP_A-8344529	rs9465880	CDKAL1					1.02						1.05										1.13			0.74						2.23	1
SNP_A-8384774	rs4710942	CDKAL1			1.05			2.3		1.56	0.52				0.8			0.95				2.16	0.92	0.91									2
SNP_A-8436706	rs6927481	CDKAL1	1.31	1.18					1.16		1.27									1.28		1.19		1.02							2.2	1	1
SNP_A-8477517	rs10806923	CDKAL1									1.03												1.03			0.86		3.02		1.98		2.19	2
SNP_A-8496054	rs12211211	CDKAL1	0.83			2.64				1.28		1.17			0.9				0.97						0.97	1.03		1.35		1.17		0.98	1
SNP_A-8529914	rs9356740	CDKAL1	1.04	1.05	0.98	2.01			1.14		0.9	0.8	0.72				0.9		1.08	0.85			0.84	1.14				0.8	0.95			1.04	1
SNP_A-8602317	rs10946403	CDKAL1	0.83		0.73				0.87			0.89	2.84		1.06				1.18	0.9		0.88	0.92		0.9				0.78				1
SNP_A-8616564	rs9465944	CDKAL1	0.78			0.84				1.22															1.17	1.05		2.04		1.07			1
SNP_A-8669088	rs2030081	CDKAL1			1.05			0.97				2.25						0.96	0.7			1.18		1.32	1.25		0.78	0.83	0.8		2.43	0.88	2
SNP_A-8669092	rs9295492	CDKAL1				1.51			0.71	1.41			0.92				0.84	1.21	1.06		1.04	0.95	1.08	0.97						2.68			1
SNP_A-8669094	rs9295496	CDKAL1	1.31					0.99				1.12					0.94		0.98								1.32	2.39					1
SNP_A-8678692	rs16884466	CDKAL1					2.34						1.21						0.82		0.76							0.84					1
SNP_A-8432607	rs6629282	CDKL5							2.55												1.24				1.16			1				0.77	1
SNP_A-1880746	rs17761446	CDKN2BAS		1.57	2.11					1.17	1.33			0.71			1.19					0.54		0.55							1.47		1
SNP_A-2027423	rs10757272	CDKN2BAS				1.38									1.85				2.16	0.96													1
SNP_A-1877504	rs2954762	CDRT4	0.69		0.92		1.37						1.02		2.38	1.02	0.99		1.3	1.06			0.9		0.98	1.39	0.91	1.22			0.92		1
SNP_A-1932338	rs729356	CDRT4	0.77		1.29		1.56			1.9					1.12		1.19		1.41	1.23			1.15	1.32	1.03	0.59	1.01	0.87			2.51		1
SNP_A-1899013	rs811251	CDYL	0.93								0.93	1.17	0.88						1.45				1.01	1.02						2.04			1
SNP_A-2096330	rs11641447	CDYL2																		0.85			0.82	2.12				1.39				0.88	1
SNP_A-2244420	rs10871396	CDYL2													2.03						0.96												1
SNP_A-4246418	rs2580315	CDYL2	0.88					0.27							0.83			2			1.04								1.43				1
SNP_A-8330651	rs10514508	CDYL2	0.95	1.03	1.73					1.31			0.64	1.27					0.81	1.61			1.33			0.94	2.08			2.75		1.77	2
SNP_A-8353185	rs9930141	CDYL2				1.04									2.25								0.72					0.6				0.95	1
SNP_A-8365967	rs3096280	CDYL2	1.09					0.94							2.26						0.89												1
SNP_A-1960103	rs10500284	CEACAM5	2.14	1.68	0.84	1.02		2.2	1.06						1.42						1.99												2
SNP_A-8662888	rs2623070	CENPE				1.37	0.75					0.94			1.57		2.17	0.98			1.42				0.89							1.56	1
SNP_A-8662890	rs2045746	CENPE				0.87	1.16					1.17			2.15		0.95	1.02			0.84				1.07			1.98		1.4		1.03	1
SNP_A-8698710	rs11724309	CENPE	3.17																						1.82								1
SNP_A-1815392	rs17023299	CENPF		0.93									1.96						1.29											2.62			1
SNP_A-1910582	rs12121403	CENPF			0.96		1.02		2.05	1.25				1.55			1.2						1.32									1.59	1
SNP_A-1875866	rs7045409	CENPP	0.93	1.07	0.99	2.07		1.01					1.18			1.26			0.86		0.93	0.89	1.03			1	0.87	1.04			1.64		1
SNP_A-1920592	rs10429459	CENPP	1.18	1.02		0.91		0.93					0.98			1.01			1.08		1	1.18	1.39			1.16	1.4	2.02			1.22		1
SNP_A-2289295	rs2296666	CENPP	1.44	2.19		1.06		1.72					1.53			2.26			1.7		1.6	0.9	1.47			1.69	1.15	0.9			1.22		2
SNP_A-8280430	rs331379	CENPP		1		1.15	1.76				1.02	1.03	0.97	1.12		1.27		1.3		0.99	1.21				1.32		1.05				2.24	1.95	1
SNP_A-2138112	rs7022941	CEP110			1.5	3.13																											1
SNP_A-2030618	rs7179618	CEP152		1					0.9		1.29		0.79			1.15	1.36					1.23			1	1.46	1.62	0.9	0.92			2.08	1
SNP_A-2074464	rs4634890	CEP170			0.88									2.25		0.81			0.93				1.01			1.15			1.08	1.1	1.59		1
SNP_A-2175902	rs2728259	CEP170	0.98	1						0.78		0.94	0.86	1.36	1.01		1.31	1.31			1.14	1.54				1.41			1.16	1.23		2.29	1
SNP_A-4239041	rs6060442	CEP250			1.51		2.01	2.04	1.36		1.06	1.86				1.55				1.22		1.26		1.74			1.57		1.22	1.21			2
SNP_A-1941681	rs4651055	CEP350		1.13	0.73			0.82	0.49			3.96	0.89			1.05				1.14				0.95				1.42		3.82		0.88	2
SNP_A-2166950	rs9286932	CEP350		1.09	1.33			0.56	0.68			0.71	1.57			0.75				0.81				0.62				0.7		2.27		0.81	1
SNP_A-1853987	rs6806417	CEP63	2.04							1.41			1.5					1.26			1.53	1.42			0.99								1
SNP_A-1909293	rs9814567	CEP63											1.39		2.59			0.68		0.8	1.11				0.96								1
SNP_A-2217448	rs11137568	CEP78				2.2	1.04	1.01			0.83					1.31	1.52					0.84					1.11	1.04					1
SNP_A-2140582	rs895901	CERKL	1.59						1.29					2.06	1.67		1.35	1.22				0.74		0.86	1.14				0.71	1.36			1
SNP_A-2246382	rs16867447	CERKL	0.75		1.01	1.23								1.14								0.63			2.2		0.91		1.33				1
SNP_A-2310431	rs13398869	CERKL									0.88													3.27									1
SNP_A-8709826	rs7602634	CERKL																			2.24								1.1				1
SNP_A-8532128	rs12116643	CFHR5	2.4		1.61		1.34		0.69		1.28			1.58	1.21		1.69								0.86	1.1		1.16		0.75	1.22		1
SNP_A-2094048	rs13221763	CHCHD3	0.96	1.05	1.01	3.06	1.03	1.04	1.04		1.1	1.15	0.9	1.11			0.95		0.97					0.99		1.08	1.1		1.03	1.04	1.07		1
SNP_A-8416211	rs4731907	CHCHD3	1.04	0.55	1.04		1.03	1.32	1.34	0.8	1.13	0.92		1.08			0.93		1.09				0.89	2.97		0.96	1.43	1.72	1.11		1.93		1
SNP_A-8541791	rs6967294	CHCHD3		0.79	0.9	0.73		0.91	0.84	1.08	0.99	1.02		0.91			1.15							1.16	1.09	1.06	0.99	0.78	0.95		2		1
SNP_A-8676020	rs6467450	CHCHD3	1.5				2.17																										1
SNP_A-8675355	rs4624521	CHCHD6						1.1							1							0.99		2.32							1.17		1
SNP_A-2214923	rs12916015	CHD2	0.93			2.18					1.06		0.94	1.03					1	1.02	1.1			1.09	1.03	1.1				0.99			1
SNP_A-2246151	rs8042395	CHD2	1.01			1.2					1.45	0.9		2.07					1.03		1.08			1.1	1.09	1				1.75			1
SNP_A-1801560	rs1883606	CHD5		0.73				0.93	2.91			1.55	1.08	1.57							1.44	1.47							1.14	1.57	0.87		1
SNP_A-1809154	rs2287079	CHD9		1.07	1.07		1.15	1.07	0.81		0.92		0.77	1.02	1.32		1.21			0.7					0.89				1.33	0.89	2.25		1
SNP_A-8571155	rs11075788	CHD9		1.04					2.18		0.81			1.28	1.24	1.64	1.11		1.1	0.91			0.81		0.79		0.91			1.51	0.9		1
SNP_A-8546975	rs2306537	CHFR						2.18			1.02		1.03	1.01						1.01													1
SNP_A-8482420	rs2786157	CHIA			1.01	1.32	0.79	1.69	1.11		1.09			2.05		1.88	1.56	1.13	1.53	1.1				1.13		0.93	1.26	0.89		0.62	0.8	0.98	1
SNP_A-1795048	rs2201913	CHL1	1.12		0.83	0.98			0.99	0.77	0.97	0.8	0.88		1.03		1.2			1.33	0.88		1.2					0.76				2.48	1
SNP_A-1847609	rs3773383	CHL1	0.81		1	1.15			1.01	0.97	0.89	0.96	1.18		1.84		1.06			1.07	1.14	1.13	0.93		1.04			1.16				4.11	1
SNP_A-1914678	rs12637802	CHL1			0.8	1.03		0.98				0.9	0.96	1.07	0.94	0.83	1.15			2.08	0.99		1			0.98		0.98				1.46	1
SNP_A-2239462	rs392670	CHL1				1.01	1.26	1.05	0.94	0.87	1.46	0.96	1.03		0.94	1.57	1.33		1.09	0.86		1.55	1.16	1.25	1.11		1.23	1.63		0.79		2.05	1
SNP_A-2275403	rs17028711	CHL1		0.77	0.73	0.87		1.1						2.19	1.12	1.61		0.97	0.64		1.71	1.02	0.89					0.68	1.31		0.57	1.17	1
SNP_A-2297090	rs13091217	CHL1				1.11	1.43	0.98	1.22	0.84	0.96	1.16	0.53		1.2	0.83	1.29	0.96		1.21		1.07	0.94	1.23	0.99	2.69			1.16		1.15	0.78	1
SNP_A-4197344	rs2648466	CHL1		0.98	1.11		0.98		1.47	1.07				0.76			2.02	1.14						1	0.87		1.22			1.16			1
SNP_A-4207728	rs13091420	CHL1				1.01	1.21	0.97	1.09	0.83	1.01	1.16	0.68		1.39	0.73	1.51	1.03		1.13		1.2	1.02	1.11	0.95	2.91			1.16		1.32	0.82	1
SNP_A-4286278	rs3915678	CHL1	0.9		1.07	1.06					0.92			1.33	1.17			1.02		0.7							1.25			0.96	1.55	2.93	1
SNP_A-8366540	rs381357	CHL1			1.03		1.1		0.92	1.08	0.92			0.87			2.02	1.04		1.02				1.11	1.15		1.18			0.96			1
SNP_A-8617948	rs2060311	CHL1			1.14		1.25		1.04		1.47				0.98		1.58		1.21				0.97	1.44	0.99		2.22	1.58		1			1
SNP_A-8617949	rs2196039	CHL1			0.98	0.93		1		1.05	0.95	0.98	1		1.87				1.14		2		1.1	1.22		1.22					1.64		1
SNP_A-8634401	rs13091018	CHL1		1.04		1.14	1.43	0.97	1.15	0.84	0.98	1.12	0.72		1.19	0.86	1.07	0.98		1.09		0.99	0.97	1.17	0.97	2.55			1.18		1.07	0.58	1
SNP_A-8432071	rs7052265	CHM							1.08	1.06			0.68									1.08			1.83	1				1.27		2.81	1
SNP_A-2290919	rs11647958	CHMP1A			1.44	1.34			1.08			1.09	2.96		1.18					1			1.15	0.75									1
SNP_A-8704140	rs7842768	CHMP4C		1.25			2.22										0.83							1.38		0.78							1
SNP_A-1965922	rs4111404	CHN1	1.25	1.1	1.06			1.76		1.05			2.07	0.62				1.11	1.16	1.39	0.98		0.74	1.48			0.99	2.85		1.12			2
SNP_A-2161848	rs3771910	CHN1	0.91	0.62		2.1	1.27		0.81	0.55						1.14		0.99			0.88	0.95							1.05	1.8	1.15		1
SNP_A-8576024	rs17270477	CHN1	1.3	1.07	0.9	0.83		0.6		1.01			0.55	2.29				0.78	0.7	1.07	1.12		1	1.06			1.29	1.09		0.63			1
SNP_A-1829097	rs7798620	CHN2				0.72				2.18	1.36		1.38					1.03		1.27													1
SNP_A-1991420	rs1364403	CHRM2		2		1.33		1.97	1.4				2.19	2.6	1.34				3.21		2.01		1.91	1.57	1.23	1.22	1.36		1.05				5
SNP_A-8331119	rs12903575	CHRNA5																										2.56					1
SNP_A-1831186	rs2665749	CHST11			1.18	2.06	0.94						0.77	0.9	0.92	1.03	0.91		0.88	0.78	1.33		0.92						0.91	1.21			1
SNP_A-2022416	rs1164768	CHST11		0.97			1.21			2.08	1.75					1.57																	1
SNP_A-2029313	rs6539155	CHST11	1.09	1.47	1.38	1.09	2.11	2.67		1.81				1.6		2.07												1.48					3
SNP_A-8564869	rs12505349	INPP4B					1.13			2.21							1.12		1.31		1.21						0.9				0.97		1
SNP_A-8505615	rs11112182	CHST11			1.47	1.76				1.65			1.27			1.54	2.04	1.51		1.48	1.37			0.99	0.89		1.46	0.83				0.86	1
SNP_A-8650128	rs12320801	CHST11											1.19				2.22	1.31									1.26					1.69	1
SNP_A-8455917	rs1117956	CHST7							0.87	1.05												0.86			1.31	2.28		1.17	0.85	0.94			1
SNP_A-1946430	rs1951226	LOC283547																														2.86	1
SNP_A-8484912	rs917379	CHSY3				0.53	1.08	0.84		0.89	0.71	2.1		1.29	1.07			1			1.26				1.92	1.94	1.55			0.72	1.21		1
SNP_A-8404652	rs2230804	CHUK	1.16		1.22	2.14	0.95			0.84	0.69	1.6	1.18		0.82			0.78			1.02			1.01	1.26		1.18			1.02			1
SNP_A-2067827	rs11074939	CIITA			1.23		1.35	1.08	2.03											1.59	1.4							1.03	1.13	0.87			1
SNP_A-4269596	rs1007738	CKAP5								1.68					0.93	1.03							0.68	1.84	2.2	1.14							1
SNP_A-1877065	rs9862261	CLASP2						0.87		0.83	0.98	1.52			1.18		0.93	1.08		1.03	0.79	0.89		1.21	0.8				0.99			3	1
SNP_A-1842261	rs12030	CLCC1			0.98	2.01	0.91	1.43		1.38			0.95	1	1.13			0.97	1.03			0.94	1		1.41		0.93		1.23	1.21	0.94		1
SNP_A-8451475	rs5934809	CLCN4											2.11				1.24				1.33											1.81	1
SNP_A-1872759	rs3774032	CLDN1																				2.35				0.99						0.57	1
SNP_A-2037712	rs9839711	CLDN1									1	1.06		2.55							2.02	0.99			0.8	0.78						1.16	2
SNP_A-8614155	rs9866788	CLDN1														0.96		1.65	0.77										1.01		2.17		1
SNP_A-1970241	rs394087	CLDN14					2.07																		1.03				0.88				1
SNP_A-4235389	rs12924729	CLEC16A			0.94		1.32	1.17						1.39	1.3		0.8					0.98			1.02						2.17		1
SNP_A-8325623	rs10840731	CLEC4A												2.01																			1
SNP_A-8354674	rs2377422	CLEC4A															1.15			1.15	1.05	0.57					0.66		0.68			2.12	1
SNP_A-8702049	rs4763446	CLEC7A	1.04	0.79					1.05				2.29			1.45	1.38		0.9	0.76			1.35			0.8	1.05	0.84		1.21		1.64	1
SNP_A-8713742	rs7315231	CLEC9A				2.09			1.14							1.33			1.51		1.48					1.11	1.21			1.2			1
SNP_A-4209750	rs6781705	SLC9A9			1.03	2.73	1.34			0.86			0.93		0.78		1.02	1.05		1.1	1.05	1.03		1.13	1.2		1.11		1.25	1.3	1.17		1
SNP_A-1819519	rs10009156	CLNK	0.99	1.04	0.94	0.81		0.63						0.64			2.88	0.85								0.62				0.89			1
SNP_A-2082926	rs7664095	CLNK	0.82						1.55	1.03	0.87				2.01				1.21	0.9					1.03	1.74							1
SNP_A-8555281	rs4698070	CLNK	1.05			1.21	0.6		0.98	0.83		0.83		0.78		1.58			1.33	1.3	0.94	1.02	1.13			0.77	1.06	0.88		2.3			1
SNP_A-1862169	rs7660980	CLOCK		0.77				1.95	1.41				0.89				2.25	1.1				1.05	0.75		0.74		1.06		1.89	1.77		0.9	1
SNP_A-1977161	rs4580704	CLOCK							1.25				1.39	2.21		0.92							0.77		0.89				1.85				1
SNP_A-8351299	rs17722979	CLOCK		0.96				1.11						1.28		1.15	0.82	1.1	0.82		0.93	1					1.01			1.14		2.14	1
SNP_A-1822783	rs168387	CLSTN2			1.05	1.68			0.53			0.79		0.85		1.16		1.02		2.31	1.43	0.64	0.83	1.62	1.12	1.21	1.53		1.3				1
SNP_A-1828998	rs4683505	CLSTN2		1.33	0.48	2.27				1.11		1.04				1.27					1.09	0.97	0.88	1.33	0.95	1.29			0.87		0.85	0.94	1
SNP_A-4200329	rs349565	CLSTN2		0.71	1.15	2.78			1.69			1.16		2.09	1.5	1.25		0.97		1.24	0.81	1.09	0.78	1.45	1.08	1.49	1.29		0.9		0.76	2.03	3
SNP_A-4290545	rs4318517	CLSTN2		0.68			0.78						1.39				2.43						0.77	0.78			1.25						1
SNP_A-8327757	rs6793464	CLSTN2	0.89	0.96			1				0.91		2.09						1.4		1.35	0.88	1.19	0.94	0.62		0.8					0.8	1
SNP_A-8424544	rs9849236	CLSTN2		0.9	0.77				0.79				2.23					1.11		0.94			1.34	0.62		1.02					1.51		1
SNP_A-8672340	rs7618181	CLSTN2	1.13								1.06		0.96		0.85																2.69		1
SNP_A-2033458	rs7220146	CLTC					1.3									1.18														2.91			1
SNP_A-1929469	rs4772225	CLYBL											2.82						1.11	1.28					1.26								1
SNP_A-8379525	rs9517886	CLYBL								1.65					1.64		3.13			1.2		0.84		0.61									1
SNP_A-8558689	rs7335639	CLYBL	1.08					0.98		2.63					1.08													0.84					1
SNP_A-1824235	rs1471379	CMIP	1.41	1.23				2.18			0.81		1.46	0.96				1.26						0.78					0.84			0.72	1
SNP_A-1955007	rs11564422	CDH2	0.98												2.11								0.9										1
SNP_A-8398352	rs876672	CMIP										0.91		2.48																0.87			1
SNP_A-4282758	rs1428227	CMYA5		1.55			1.09		0.95				1.05							0.9	1.21	1.04			0.85					0.91		2.2	1
SNP_A-1940806	rs3769754	CNGA3	2.03		1.08	0.81			1.73		0.77	0.87	0.74		1.27	1.17	0.92			0.92	0.82		1.01	0.81	1.09	1.03		1.12	0.86		0.64	1.03	1
SNP_A-2117288	rs41466745	CNGB3	0.52	0.91	0.68		1.58	0.72	0.47	1.1	0.66	0.99	2.42	1.39	0.86		0.97	0.52	1.11	0.67	0.77	0.73		1.91	1.46				0.58		0.71	2.59	2
SNP_A-2197140	rs7842410	CNGB3		0.82	1.01			1.33			0.86	1.03		3.15	1.05	1.16	1.22				0.99	1.37	0.93			0.97				1.23			1
SNP_A-2299227	rs1561110	CNIH3		0.84			2.13	0.99	0.97				0.95			1.01	0.97	1.02	1.11	0.94	1.33				0.9	1.06		1.28				0.96	1
SNP_A-8283148	rs5951608	CNKSR2						0.57	0.57				0.93								1.33					1.1					2.19		1
SNP_A-2012198	rs6557362	CNKSR3	0.62					1.22		0.92		2.07			1.14		1.18	1.04	0.98	0.88		0.99	0.91	1.29	1.03				1.04	1.39		1.1	1
SNP_A-1838127	rs41497749	CNN3		0.61	0.92	1.48							0.9	1.84			0.93		1.3	1.12			0.77									2.04	1
SNP_A-8331160	rs17108038	CNOT2	1.34	0.56				1.09		1.38	0.77	1.01		1.15				0.88					1.06	1.07	1.85		1.29	0.9	2.19	0.85	0.91		1
SNP_A-1877794	rs10272576	CNOT4	1.2	0.66			1.66						0.84			1.03				1.02	2.09	0.46									1.07		1
SNP_A-2151713	rs3812287	CNOT4	0.94			2.05	1.01	1.37		0.49		1.21		0.86				1.27						1.16				2.76		0.82			2
SNP_A-4208152	rs6546371	CNRIP1		1.45	1.29				1.01	1.35	1.03	0.71	2.04					1.7			1.11				1.31							1.49	1
SNP_A-2089427	rs1930641	CNTLN							1.21	1.27																	0.85			2.06			1
SNP_A-2103904	rs3808795	CNTLN	1.05	1.02				1.12	2.2		1.34						1.09									1.14			0.94		1.34		1
SNP_A-2296364	rs2383022	CNTLN		0.91	0.88			0.65	1.5	2.18	1.38			1.19		0.65			1.24	1.56			1.02	0.94			1.02						1
SNP_A-4272285	rs10733337	CNTLN	0.91						1						2.56	0.85				0.97		1.42	0.92				1.08		1.27				1
SNP_A-8338596	rs4961438	CNTLN	1.04			0.57		1.06	0.9		1.28						1.11												0.85		2.1		1
SNP_A-8351488	rs7870101	CNTLN		0.98					1.16	1.33																2.84	0.8						1
SNP_A-8630295	rs679379	CNTN3	1.07				1.65						0.97	0.97		0.88	2.72	1.18			2.21		0.86	0.85			1.19		0.97	0.96	1.31	0.99	2
SNP_A-1790124	rs7649378	CNTN4							2.02	1.12						0.76	0.96	1.12														1.19	1
SNP_A-1971376	rs10510234	CNTN4					1.4						2.14										1.36										1
SNP_A-8711819	rs13095201	CNTN4				3.1	0.82	0.82		0.88				1.58		0.84	0.95	1.18			1.4											1.08	1
SNP_A-1888943	rs11605324	CNTN5				2.23					1.05																						1
SNP_A-1929965	rs599197	CNTN5	1.13			1.03		0.85			1.46				1.71		2.05	1.3	1.53		1.93	0.82	1.05	0.95		0.88		0.93		1.35	1.26		1
SNP_A-1956230	rs12419474	CNTN5	0.9	0.99	1.14						2.44						0.96							0.7									1
SNP_A-2014331	rs17132819	CNTN5									0.87											2.11		0.99									1
SNP_A-2014349	rs1824583	CNTN5		2.34																													1
SNP_A-2014404	rs10501920	CNTN5						0.92							2.27			1.67	1.2		1.22	1.97	0.97										1
SNP_A-2014407	rs2458164	CNTN5	0.94		0.87	1.03					0.99				1.8		0.8	1.3	1.32		1.07	1.57	1.01	2.04						2.1			2
SNP_A-2126375	rs11223109	CNTN5						0.52			2.51																						1
SNP_A-2141389	rs1939699	CNTN5					0.42			2.17				0.81	0.76							0.5						0.52					1
SNP_A-2149792	rs1690812	CNTN5				0.68		2.01			0.81																						1
SNP_A-2151017	rs11222969	CNTN5	2.87					0.6			1.42					2.99														1.01			2
SNP_A-2232145	rs2897525	CNTN5				1.49	1.7				1.06	0.67				0.84			0.86		1.55			0.88			0.87	0.89		2.34	1.48	1.31	1
SNP_A-2244090	rs12049887	CNTN5	0.82		0.91	2.21		0.98		0.99	1.08	0.94						0.71				1.29											1
SNP_A-2253674	rs11220671	CNTN5						0.95										1.16	1.32		1.95	2.51	1.7										1
SNP_A-4215446	rs648519	CNTN5			1.11	1.4				0.88		0.92				2.24	0.9																1
SNP_A-4215452	rs10501939	CNTN5				3.11		1.03		1.06	1.02											0.85		1.02	1.12						1.09		1
SNP_A-4215453	rs770600	CNTN5						0.8			1.13										2.05			0.83									1
SNP_A-4300340	rs1910710	CNTN5									2.12																						1
SNP_A-8302541	rs17133813	CNTN5			1.04	0.8			1.26	1.14		1.46		2.04		1.04	1.23				1.81				0.73		1.04	0.92					1
SNP_A-8340364	rs1494464	CNTN5	0.8								1.25								0.79				2.02										1
SNP_A-8340374	rs10501921	CNTN5					1.15	0.86							3.23			1.28	1.64		1.13	1.49	1.66							2.34			2
SNP_A-8349734	rs7130695	CNTN5						1.01			2.07		0.86																				1
SNP_A-8373061	rs6590280	CNTN5						1.04					1.61		0.97	2.18		1.71	1.6		0.97	1.27	0.65		0.81			0.64			0.58	0.64	1
SNP_A-8499438	rs1504733	CNTN5									2.28							1.86												1.5		0.91	1
SNP_A-8515489	rs17133191	CNTN5		1							9.51				5.87									1.64					1.99	0.68	0.93	1.05	2
SNP_A-8518409	rs10894664	CNTN5					1.06						1.24				1.06			0.47											2.03		1
SNP_A-8612575	rs12793321	CNTN5					0.59		1.85		1.07			0.52			1.49			0.6											2.01		1
SNP_A-8597853	rs17023770	ARHGAP10			2.17														1.85														1
SNP_A-8466987	rs6782048	CNTN6						1.57				0.82														2.34	0.84						1
SNP_A-1991644	rs2215338	CNTNAP2	1.04	1.02	1.11	1.34		0.95	1.07	1.47		1.18		2				1.01	0.98			0.86		0.92	1.12	1.13	1.2	1.29		1.06		1.57	1
SNP_A-4296341	rs2373341	CNTNAP2				2.01		1.43				0.97		1.31			1.32	1.34	1.45			1.03		1.5		1.15		1.34		1.17	1.15	1.15	1
SNP_A-4300054	rs12536060	CNTNAP2	1.35				0.94	1.48		1.2			2		1.89		1.54		1.51		1.47	1.23				1.16		0.83	1.56			0.9	1
SNP_A-8692288	rs2906303	CNTNAP2	1.41		1.64								2.3	0.91																			1
SNP_A-1950438	rs1866479	CNTNAP5					0.76		0.92	1.13				1.13		2.22		1.06			1.17	0.85	1.36		0.84			1.11	1.29		0.47		1
SNP_A-1964761	rs10496635	CNTNAP5		1.3										2.28					1.33	1.52	3.29			0.87	1.42	2.59	1.67		1.17				3
SNP_A-8614756	rs7578650	CNTNAP5									1.47			2.35	2.15																		2
SNP_A-2215384	rs2240092	COBL	1.14	2.12	1.3		1.41	2.8			4.34			1.95		2.32				4.11	3.2						1.28	2.51			3.38	3.01	9
SNP_A-8525564	rs11766075	COBL								2.23							2.05	1.15								1.2					0.9		2
SNP_A-2053670	rs2479131	COG2		0.99		1.65									1.61										0.72	0.93		0.98				2.16	1
SNP_A-8525773	rs4846999	COG2	0.83				1.14	1.27		1.42				0.5							1.22	0.92		0.86					0.86	2.11			1
SNP_A-4274840	rs1548524	COG5					2.56										1.36									1.25							1
SNP_A-1928407	rs9548926	COG6	1.31	0.8							1.89			2.15			1.02		1.13				0.89	1	0.94		0.94						1
SNP_A-8369310	rs7326699	COG6	0.93	1.47					0.94		1.82			2.63	1.59			1.03	1.14	1				0.89					0.7			0.38	1
SNP_A-8570740	rs17127203	COL11A1											3																				1
SNP_A-1803862	rs1227777	COL13A1					1.05		2.13	1.9		1.1		2.17		1.15	1.91					1.01		0.99	1.32	0.76				1.89		2.18	3
SNP_A-4213212	rs10505379	COL14A1												2.66										1.15									1
SNP_A-1997349	rs10512262	COL15A1		0.73			0.45	1.1	1.12		0.89		1.25			2.53			1.05	0.93				0.85		0.51	1.33				0.91		1
SNP_A-1814981	rs3806028	COL19A1				0.93				0.91	1.08		0.85	1.12	2.42				0.72	1.08			0.71	0.89					1.2		0.93		1
SNP_A-2161585	rs7756062	COL19A1		1.07					1.02						2.21		1.11		1.02							1.26			1.25	1.41	1.49		1
SNP_A-4201287	rs6908849	COL19A1				0.76				1.25	0.81		1.34	1.27					0.61				0.93	1.02				0.79	2.28		1.61		1
SNP_A-4265722	rs1474044	COL19A1		1.6					2.08		1.06		0.96	0.88				1.32	0.75	0.98	0.74	1.33	1.01			1.19	0.84		0.76		1.18	0.91	1
SNP_A-8460095	rs3806034	COL19A1				1.69				1.3	1.15		0.9	0.84					0.79	1.4			1.21	0.73		1.32			2.25		1.22		1
SNP_A-8705901	rs9446170	COL19A1		1.18					1.01						2.16		1.85													1.22			1
SNP_A-8357895	rs6881003	COL23A1		1.04	1.1	1	1.12		1.08		1.21		2.01						1.2	1.03	1.71			0.93	1.05	0.9	2.19	1.05	0.99	1.42		1.2	2
SNP_A-1860554	rs2389974	COL24A1				2.24															1.21												1
SNP_A-1948230	rs313708	COL24A1			1.1					1.42	1.02	1.1	0.74	0.89		0.63		1.21	1.25	1.35	1.46			1.34		1.25	0.83				0.87	2.36	1
SNP_A-2082961	rs12075929	COL24A1														2.1	0.86		1.11	1.54			1.01			1.16				0.77	0.79		1
SNP_A-2145151	rs10873740	COL24A1																	2.54														1
SNP_A-2304380	rs12563027	COL24A1		2.33	0.9			1.04		1.03		1.02			1.2	1.57						0.86				1.05	1.08	0.86	1.22				1
SNP_A-8324334	rs184339	COL24A1	0.89	1.27												1.92															2		1
SNP_A-8377124	rs11161695	COL24A1	1.23		0.8	1.1				0.79	1.4	0.73	1.26			1.03		0.98	0.85	1.06	1.22		1.09	0.84		1.07	1.11			2.03	1.31	1.09	1
SNP_A-8402854	rs7532758	COL24A1			0.9					1.37		1.63			1.21		0.9		2.01	1.23	0.82	0.88	0.84	1.13			0.82	1.04	1.3	1.63	1.27	1.08	1
SNP_A-8642703	rs11161717	COL24A1																							0.81				2.53				1
SNP_A-8653158	rs12739200	COL24A1	0.98			2.07																	1.01							0.87			1
SNP_A-1978453	rs3096490	COL25A1		0.61									2.2			0.91																	1
SNP_A-2166978	rs2081466	COL25A1	2.38				0.65	0.56		1.06			0.95							0.58									0.55		0.56	0.87	1
SNP_A-2291202	rs12646527	COL25A1																			2.04												1
SNP_A-8540370	rs12640304	COL25A1	0.95			0.64	0.82		2.59		1.11		1.45	1.12	0.87		1.6		1.41			1	0.98				2.31						2
SNP_A-8663041	rs4956250	COL25A1																						2.25		2.18	0.92						2
SNP_A-1831326	rs2123566	COL29A1		1.05			2.45	0.99					1	1.32				0.99	0.99				1.03	1	1.14			1.02		1.14	0.96		1
SNP_A-1793655	rs7983906	COL4A1												2.18																			1
SNP_A-8589187	rs648031	COL4A1								0.73								2.69		0.72													1
SNP_A-1917621	rs2222869	COL4A4	0.87				0.87	1.29			0.96	1.24	1.57	2.24		1.12					1	0.92		0.92				0.78	0.87		1.08		1
SNP_A-4257255	rs4566357	COL4A4		0.96	1.11	0.73	1.26	1.11		2							0.9	0.88	1.22	1.06	1.42				0.91	1.39	1.03			1.48	1.64		1
SNP_A-4279572	rs9989875	COL4A4		1.54					0.99		1.8				1.03	1.18	1.13	1.03		0.97	1.09	1.06		0.99	2.56			0.95		0.82			1
SNP_A-8578262	rs13409482	COL4A4				2.12															1.14	0.9		0.92					0.92				1
SNP_A-1923329	rs1266765	COL4A6																				2.15											1
SNP_A-8584029	rs3811156	COL5A1				2.96			0.71	1.5								1.28				0.88										1.46	1
SNP_A-2289546	rs10181597	COL5A2	0.65				0.69	0.93		2.55						0.69						1.6	1.82		1.05	0.86			1	2.16			2
SNP_A-8413841	rs4667264	COL5A2	1.24	1.11			1.12		1.79	1.52			2.55		2.08							0.91	0.89			0.8		1.08		1.01			2
SNP_A-2217862	rs9823913	COL6A6			1.31	0.47			1.33	0.85	0.99			2.09					0.79								1.06	1.65				1.04	1
SNP_A-1924050	rs793495	COL8A1			0.72						1.34			2.46		0.96	1.08					1.38	1.8		2.14	1.06							2
SNP_A-1973642	rs4928213	COL8A1									2.07															1					0.97		1
SNP_A-2280589	rs9859600	COL8A1									0.97													0.8							2.87		1
SNP_A-4293784	rs1606481	COL8A1			0.96							1.04		2.18	1.23		1.41					0.9											1
SNP_A-8410403	rs641461	COL8A1				2.63				1.42									0.7								1.01						1
SNP_A-8460235	rs9836385	COL8A1				1.21					1.02									3.62													1
SNP_A-1890070	rs1485292	COLEC10						1.5			2.51	1.14		1.68		1.22	0.89			1.05		1				1.73	1.14		0.9				1
SNP_A-1876339	rs1940442	COLEC12			0.97					1.12	1.48				0.95				1.03				1.15	0.88	0.69	2.19	0.73	1.93		0.96			1
SNP_A-1895304	rs1383227	COLEC12									0.93		0.87		0.95					0.76		2.02						1.25	1.65				1
SNP_A-8562842	rs9954032	COLEC12			1.09					2.07	1.31	1.21							1.55						1.47			1.71		1.61		2.31	2
SNP_A-1850862	rs13362436	COMMD10	0.72		0.99			1.1												1.02	2.52											1.48	1
SNP_A-8578533	rs9306281	LARGE				0.42	0.73			1.44	0.99					2.06		0.86			0.89						1.69				0.87	1.13	1
SNP_A-8471101	rs631376	ALKBH8	1.2	0.99	0.94		1.34				2.5			1.18	1.52	1.08		0.99	0.81	0.91	1.35	1.69			1.05	1.25	1.27	0.86	1.24	1.04			1
SNP_A-2045576	rs17139253	COMMD10	0.92		0.91	1.07	2.21	0.93							0.96					1.11	1.48								1.2			0.88	1
SNP_A-2090270	rs10063312	COMMD10		1.02		2.05			1.55	0.99						0.96	1.07	0.98			1.04			0.96	1.07		1		1.41				1
SNP_A-4256131	rs10037375	COMMD10	0.89		0.93	1.34								0.64		1.78			1.11	1.13	1.33								0.93	2.49		0.98	1
SNP_A-8611311	rs4921056	COMMD10	0.77	1.38	0.85			1.77	0.89	2.28					1.29	1.16	0.94	0.67		0.87				1.15	1.02		1.15						1
SNP_A-8676584	rs784480	COMMD10		1.28		2.14		0.87	1.16					0.93	1.03		0.92	1.14	1.12		0.81			1.06	1.02		0.96		0.92	0.8			1
SNP_A-8383264	rs7946259	COMMD9	1.26		0.86								0.73						0.78	1.17			1.11	0.94		0.92	2.02			1.09			1
SNP_A-2092415	rs2597193	COPB1	1.16				1.02		1			0.97		1.29		0.81	2.13	1.62						0.85		1.16			1.71			1	1
SNP_A-2186060	rs4693596	COQ2				2.39			0.99	1.25										1.07				1.29		1.76							1
SNP_A-1806335	rs1866688	CORIN									0.99					2.23		1.01															1
SNP_A-1977051	rs12509275	CORIN					0.95		1.28					2.15		0.85				1.33		1.01								1.11			1
SNP_A-8678942	rs7300215	CORO1C				0.9		1.62		0.8				1.02					1.37			0.8	1.31		1.28		1.13	2.02	0.98		0.54	0.62	1
SNP_A-4286024	rs2269195	COX15	0.74											1.52			1.08								2.29		0.91		0.94				1
SNP_A-2212054	rs4560384	COX7B2	1.05	1.18	1.07				1.06				1.53	2.02		0.92	1.31	0.93			1.06			0.99		0.82			1.26	0.91	0.95	0.95	1
SNP_A-2009215	rs3816893	CP			2.45		0.66						0.92						1.17				1.28										1
SNP_A-1848446	rs12927277	CP110			1.3						1.3		1.32		1.51	0.95	1.08		1.61	2.54	1.23	1.36				1.53							1
SNP_A-4233890	rs7007331	CPA6			1.15														1.42			0.57	0.7			2.23	1.07		1.11				1
SNP_A-4266998	rs2217028	CPA6							0.79						1.28			1.02	0.81									1.16			1.31	3.43	1
SNP_A-8373551	rs1351515	CPA6																												2.39			1
SNP_A-8435269	rs11997518	CPA6																								2.24							1
SNP_A-8588758	rs1145170	CPEB1			1.02				0.82		1.09					0.79	0.78	0.92	0.73			1.41		0.58	1.01	1.79	1.04	0.94			2.12		1
SNP_A-2037655	rs1571176	CPEB3				2.09					1.21	1.11				0.81					0.86							1.19					1
SNP_A-1948117	rs6767374	CPNE4		0.87	0.97		1.01		1.33	0.94	1.04	1.22	0.93		1.16	0.88		1.12		0.84	0.85	0.74		0.89						2.03			1
SNP_A-1974352	rs6787286	CPNE4	1.11	1.3		0.69									1.49	1.42	2.23		1.21		1.3	0.93	1.01	1.14	1.08	1.19			1.26				1
SNP_A-2072473	rs1105076	CPNE4	1.45			1.22	0.9	1.33	1		1			2.01			1.03					0.85						0.78				0.89	1
SNP_A-2218012	rs9837417	CPNE4			0.65														2.42	1.14							0.77		1.82				1
SNP_A-4234146	rs1513378	CPNE4								1.04	1.06							2.28	0.84			2.04							0.94				2
SNP_A-4263766	rs1875619	CPNE4	0.74	0.91				0.86	1.23			0.75	1.26		2.04	3.36					0.97			1	1.24	1				1.17	1.28	1.55	2
SNP_A-4301104	rs4854829	CPNE4	1.03					0.84	1.52						1.16	2.95					0.99			1.03	1.24							1.01	1
SNP_A-8426731	rs13079224	CPNE4				4															0.81												1
SNP_A-8465490	rs6805939	CPNE4						0.77			1.15	2.08			0.66					0.93					1.32	0.81							1
SNP_A-8469016	rs12634351	CPNE4	1.14			1.29		1.29			0.74	0.98		0.96					1.1	1.79		0.9	0.59	1.28			1.83	1.19	0.65	2.35		1.2	1
SNP_A-8530591	rs4854827	CPNE4	0.9			0.85			1.85		1.02			2.85					0.69	1.06							0.75					1.12	1
SNP_A-8599739	rs456012	ENOX1			0.7									0.52				2.08				1.1								0.78			1
SNP_A-2147329	rs10876149	CPNE8									0.93	1.19				1.35		1.05														2.87	1
SNP_A-1871911	rs2160851	CPS1			0.91	0.73						3.2	0.99				0.55	0.9	1.24				1	0.61		0.85	0.86					0.87	1
SNP_A-1966718	rs1509820	CPS1			0.67	0.73				1.16	0.88		1.05	0.65	0.91		1.32				0.74			1.14						3.17		1.64	1
SNP_A-2198912	rs2664231	CPS1										1.07		0.81				1.34	0.88		2.13		0.97				0.83		1	0.92			1
SNP_A-4277956	rs7573258	CPS1			0.85			1.09			0.85		1.7	1.29	0.83						1.03			1.73				2.11		0.97			1
SNP_A-8582589	rs10932343	CPS1										0.5		1.71				0.84			1.06		0.89				2.17		1.46	1.65			1
SNP_A-1902042	rs12034598	CR1					3.64	0.8		1.15		0.86	1.34	1.84		1.57		0.52	1.08	0.77	0.71										1.97		1
SNP_A-2229261	rs2274566	CR1	0.68					0.55		4.43	0.98						1.18		0.67					0.93			1.5			1.01		0.96	1
SNP_A-8383513	rs3849266	CR1	1.37					0.36		6.23	0.96						1		1.71					0.94			1.91						1
SNP_A-1878076	rs2761422	CR1L					0.71	0.92					0.78	2.95	1.27			1.08						1.18							0.41	1.18	1
SNP_A-8537041	rs12025522	CR1L		0.94				1.93	1.24				2.06					1.09		0.83	1.31								0.93				1
SNP_A-8551114	rs6690215	CR2		1.17	1.11	1.05		1.18	1.13			1.06	0.9	1.03	0.95	1.06	1.49	0.95						0.98	1.62				0.88	2.28	1		1
SNP_A-1809382	rs7968218	CRADD	0.97	1.1			1.25	1.09				0.71	0.76			0.84		0.93		0.91	1.22					1.04		1.22		2.5	0.98		1
SNP_A-1893500	rs10859571	CRADD	1.02				1.15					0.94	1.79	2.08	0.99	1		1.03						2.08	0.79	1.28				1.65	1.26		2
SNP_A-2088305	rs11107176	CRADD				1.77	1.6		1.41			1.18	1.1			0.62		0.79						1.2	1.4	2.2			1.34				1
SNP_A-4239678	rs10437877	CRADD	0.91			1.16	1.18					0.92	1.86	2.61	1.05	1.08		0.95						1.78	0.82	1.19				1.59	1.73		1
SNP_A-8422070	rs12825691	CRADD	0.98	0.85		0.89	1.04	0.59				1.24			0.91	1								0.99		1.06		0.92			2.1	0.76	1
SNP_A-8529126	rs10777534	CRADD			1.08		2.12					0.98	1.32			1.28	1.15	0.81		1.12					1.36			1.44		1.08			1
SNP_A-8601889	rs10777543	CRADD	1.1			1.26	0.97					1.29	1.13	1.06	1.06	0.81		0.83						1.28	1.29	2.78					1.73		1
SNP_A-4266643	rs4732279	CREB3L2									0.96	1.23			2.07		0.91			1.11	1.18		0.87	0.73						2.5			2
SNP_A-1903883	rs42704	CREB5		1.01								0.93		3.07		0.99					1.21		1.02	1.12		0.98	0.92	0.89		1.07	1.76		1
SNP_A-1904555	rs7779184	CREB5	1.37				0.98				1.46				0.9			0.98												2.04			1
SNP_A-2164535	rs41488846	CREB5						1.26		2.22			1.26								1.74				1.18					1.1	1.02	1.37	1
SNP_A-2186533	rs167459	CREB5	1.45	1.23		1.18									1.15								1.64			0.84	1.17	1.3		1.42	2.16		1
SNP_A-2264948	rs1859020	CREB5												0.73							1.25									2.33	0.99	1.03	1
SNP_A-8591298	rs6956592	CREB5										1.64																2.38		1.48		1.26	1
SNP_A-2057975	rs6500556	CREBBP				2.11		0.87												0.75													1
SNP_A-8647016	rs242924	CRHR1						1.4						2					1.07						1.01						0.97		1
SNP_A-1962723	rs12466450	CRIM1														0.87					1.02				1.15			2.32					1
SNP_A-1962729	rs3770874	CRIM1	0.94	1.14	1.08				0.79			1.06				1.17		0.93			0.67		1.36	0.97	0.81		0.84	0.66	2.92			0.74	1
SNP_A-2023741	rs3770887	CRIM1	1.02	1.16	0.91	1.5	0.82			1.86		1.15		2.11		0.72	0.53		1.3	0.7		1.76		0.72	1.3						0.83		1
SNP_A-2268134	rs17018786	CRIM1			0.99	2.04														0.63				0.85			1.02						1
SNP_A-8406700	rs6812315	CRMP1																							2.05								1
SNP_A-8512244	rs8036302	CRTC3	1.7	0.93	1.67		2.6	2	3.35	1.55	0.88	2.11		1.67	1.97	2.13	2.54	2.13	1.14	1.36	1.69		1.24		1.11	1.78	1.46	1.44	1.43	1.18	1.41	1.33	7
SNP_A-1900601	rs3741892	CRY1	1.08		0.94	0.7			2.52											0.99		0.88				0.6		0.88				0.96	1
SNP_A-2120030	rs7638004	CRYBG3		1.1	0.86	2	1.13														1.13		1.11	1.01			1.07		0.98		1.15		1
SNP_A-4255009	rs7330265	CRYL1		1.03	0.94	2.78			1.55				1.41						1.16	0.98				1.1	1.13		1.08			1.45			1
SNP_A-8414058	rs4763577	CSDA	0.74	0.75	1.2		1.3	0.66	1.16		2.1	1.37	0.84		0.74	0.69	1.17	0.81	1.11	0.68	1.43	1.67	1.16		1.11	1.06	0.96	1.2				1.19	1
SNP_A-2089812	rs6996732	CSGALNACT1									1.58													1.01							2.07		1
SNP_A-1818690	rs13263104	CSMD1				2.14					1.01								0.86						1.01		1.13	1.04					1
SNP_A-1835733	rs596775	CSMD1												2.4																			1
SNP_A-1902493	rs7015612	CSMD1	1.54	1.07	1.18				1.64	2.84			2.73		2.55	1.55										1.09	1.11				1.05		3
SNP_A-1946244	rs4568637	CSMD1	1.21				1.32							1.1		1.51		1.01	1.05				2.17									1.26	1
SNP_A-2051825	rs4875192	CSMD1			1.1					1.06			1.09				2.31		0.95	1.35								0.95					1
SNP_A-2255502	rs17067335	CSMD1	1.21	1.04				1.34	1.39		1.48	1.2	1.87	2.79		1.48		1.55	1.58	1.39	1.23		1.11	1.41	1.27	1.16				1.47		2.06	2
SNP_A-4201733	rs2721290	CSMD1												2.01											1.22							0.55	1
SNP_A-4237583	rs2407304	CSMD1		0.98		0.76	1.12	1.16	0.8				2.04	1.14	0.9		0.83	1.51	2.31	0.95				0.83				1.09	0.88		0.63	1.47	2
SNP_A-8430035	rs13271752	CSMD1								2.09	1.55																0.81	1.18				1.15	1
SNP_A-8507481	rs4875252	CSMD1			1	0.75		1.03				1.11	1.36	1.05	1			1.08				1.21	1.02		1.43	1.48				2.16	2.11	2.56	3
SNP_A-8599378	rs11775951	CSMD1				1.25		1.24		1.6	1.39			1.51	2.12										1			1.62				1.11	1
SNP_A-8691714	rs7839985	CSMD1		1.1	0.96	3.65	1.02		0.9		0.95		0.84	1.25				0.91	0.8	0.79		0.95	0.96	1.28	0.89		1.04		0.97		1	1.21	1
SNP_A-8716404	rs2720768	CSMD1			1.08	1.25		1.05		2.35	1.31	0.57	1.28				1.65		1.04		1.39	0.76							1.35	2.1		1.93	2
SNP_A-4243688	rs4652990	CSMD2			1.19	1.89			0.88	2.61		1.18			1.9		2.03	1.35	1.53		1.71	1.02	1.31	1.58		1.13	0.96				1.95		2
SNP_A-8378274	rs10914787	CSMD2				0.58	1.12	1.15	1.16		1.01	1.57		2.1	1.37		1.12						1.09	1.11	1.34	0.85	1.88	1.25	1.21	1.17		1.04	1
SNP_A-8455166	rs12023377	CSMD2												1.13					2.12			0.62											1
SNP_A-8655680	rs4653377	CSMD2					0.86						2.13	1.35						1.18	1.31							0.96	1.25				1
SNP_A-2075935	rs1532799	CSMD3				3.46																											1
SNP_A-8280765	rs981692	CSMD3	0.95		0.89	2.72	0.9	1.07			1.13		1.15		0.97	0.89	1.12		0.84	1.19		1.21		0.87	1.1			0.87	0.98				1
SNP_A-2161867	rs11855072	CSNK1G1							2.03																1.06								1
SNP_A-4208470	rs1005840	CSRNP3	0.99		1.1			1.01	1.17	2.04	1.18												0.6		1.28								1
SNP_A-1959937	rs2071866	CSTF2							0.57												0.8				1.24	2.56				1.12			1
SNP_A-8594062	rs5921665	CSTF2								0.79															0.91	0.67		0.54	0.89	2.87		1.88	1
SNP_A-2260645	rs10836026	CSTF3	0.89				1.64	1.01		1.01			0.98		0.98									0.93	0.74				1.07		2.51	1.47	1
SNP_A-2112618	rs10151659	CTAGE5		1.06	1.13	2.15		1.58					0.97				1.34						1.03	1.07	1.07		0.92				1.11		1
SNP_A-2159677	rs10140997	CTAGE5			0.79								0.87													0.89			2.31		0.7		1
SNP_A-8454778	rs12141472	CTBS																													2.21		1
SNP_A-8714370	rs7547026	CTBS				2				1.14						0.76		1.22		1.01													1
SNP_A-2026214	rs7245376	CTDP1							2.05				1.39																				1
SNP_A-8514124	rs2279104	CTDP1					0.99																		2.69							1.26	1
SNP_A-2124843	rs7580421	CTNNA2	0.68																	1.23		0.75						3.25					1
SNP_A-2127827	rs7582779	CTNNA2	2.41				1.6		1.35				1.72		1.36		0.84	1.44		2.92		1.15			1.45			2.07		1.01			3
SNP_A-8560848	rs10169767	CTNNA2		1.01					2.04	1.09			1.96	1.15				1.17	1.64			1.31								0.92			1
SNP_A-8605348	rs7590463	CTNNA2		2.12																													1
SNP_A-8672379	rs11126771	CTNNA2	0.7	0.64																								2.23					1
SNP_A-1819666	rs17697894	KIAA1324L		1.49		0.89					1.92	1.07								1.1		0.43									2.36		1
SNP_A-2076191	rs10997727	CTNNA3											1.86																2.64				1
SNP_A-2103836	rs10822736	CTNNA3					0.95	0.77							2.79																		1
SNP_A-4249350	rs7091390	CTNNA3											2.36		1.46				1.05						1.04		1.07						1
SNP_A-8470948	rs16924451	CTNNA3		1.12	1.29		1.76		3.95	1.96	1.42				2.28	3.02	2.97	1.68	2.04			1.07	1.4	1.1		1.61	1.77			1.96		1.49	5
SNP_A-1997614	rs7021366	CTNNAL1		0.94		0.97			1.26				0.5	0.6		2.11			0.76	0.82	0.84			1.62		1	0.82		1.25				1
SNP_A-2313730	rs4978763	CTNNAL1				0.97			1.59							3.12			0.75				1.34	1.29	1.16	1.23	1.26		1.54				1
SNP_A-2176895	rs6020339	CTNNBL1				1.08	0.8		0.99			1.37	1.28		2.12			1.55	1.73	0.82	0.99				1.67				0.98			1.3	1
SNP_A-2129498	rs11133672	CTNND2			0.79						2															3.01							2
SNP_A-2293046	rs10078846	CTNND2			0.73				0.97		2.39													0.89		1.27							1
SNP_A-4210823	rs6873671	CTNND2	1.14		0.77			1.27				0.99						1.05						2.31							1.33	1.15	1
SNP_A-4280417	rs4299739	CTNND2			0.85				0.85		0.89													0.93		2.5							1
SNP_A-8308367	rs2905995	CTNND2											2.64																				1
SNP_A-8460455	rs2302179	CTNND2			1.38		1.27	1.22			1.17		1.15	2.09			1.79		1.4	1.23			1.16		0.98	1.04	1.56		1.15	1.32		1.44	1
SNP_A-1882523	rs558639	CTNS				4.05			1.01					0.91							1.03										1.01		1
SNP_A-1979515	rs7684248	CTSO	1.28		1.22			0.7					1.37	0.73				0.92			0.98	1.11	0.97	2.02	0.98	0.77	0.99			1.44		1.11	1
SNP_A-2133935	rs6856354	CTSO	0.9		1	1.14	1.18	0.84					0.62	1.46				1.08			0.92	1.09	0.94	1.77	1.01	0.67	1.07			1.26	2.15	1.21	1
SNP_A-2054377	rs2271459	CUBN																	2.06											1.02	0.85		1
SNP_A-4202332	rs7072049	CUBN		0.96		1.64		0.99					0.95		0.94			0.82	0.95			0.95	0.88	1.08	1.03			1.09	1.08	2.37	1.08	0.87	1
SNP_A-4202339	rs2942366	CUBN																0.89							1.09				1.12	2.47			1
SNP_A-4233069	rs2281648	CUBN					2.18							0.79			0.6				1.22	2.42	0.82		0.8	0.68						0.63	2
SNP_A-8601437	rs780846	CUBN						1			2.27				1.68								0.83	1.07		1.32					1.18	1.85	1
SNP_A-8602362	rs703065	CUBN																													2.11		1
SNP_A-1889879	rs12220353	CUGBP2								0.99				1.23		1.23		0.86	0.84		1.17		0.94	1.08			0.98	0.76			1.03	2.07	1
SNP_A-2047553	rs1291880	CUGBP2	1.15		1.02			1.64	0.77			1.61	1.27									2.1	0.99			1.08							1
SNP_A-2053888	rs2022377	CUGBP2	1.41		1.1		0.89	1.62	0.86			0.87	0.88									3.09	0.78			0.82		0.88		1.14			1
SNP_A-2257255	rs10905900	CUGBP2	0.73			2.12						0.88	0.7	1.07		1.25									1.06		1.25	1.07		0.82			1
SNP_A-4267256	rs10795843	CUGBP2	0.7			2.23						0.84	1.03									1.03								0.76			1
SNP_A-4267261	rs1291836	CUGBP2	0.94		0.9		0.71	1.02	0.9			2.16	1.02									1.11	1.05			1.2				1.08			1
SNP_A-8453223	rs10905891	CUGBP2	1.05		1	2.61	1.15	1.3	0.74			0.66	0.91									1.51	1.18			1.13		0.99		0.76			1
SNP_A-1835892	rs2007404	CUL1			1.02				0.9	1.23		0.9	0.84	1.06	0.91	2.3			0.93													1.26	1
SNP_A-4197686	rs767844	CUTC		0.88	0.97							0.74				1.96		1.52		1.41	1.05	1.02	1.05				0.9	0.97	0.89			2.03	1
SNP_A-2064847	rs520729	CWF19L2	0.95	0.79	1.04	1.38			2.59	0.85		0.91					1.3		1.37		1.05		0.7	0.89	0.98	1.2	1.02		1.52				1
SNP_A-2287977	rs660962	CWF19L2	0.99	1.26	0.77	1.58			2.19			1.44					0.99		1.41				0.85		0.97						1.08		1
SNP_A-8454516	rs670949	CWF19L2	1.13	1.1	1.09	1.28			0.73			2.19					0.96		0.73		1.06		1.04	0.85	0.74	1.16	1.69		2.43		0.67		2
SNP_A-8505740	rs17106909	CWF19L2	1.27	0.93		1.29					1.31			2.48		1.89			0.8	1.97	1.04	2.14	0.88				1.06	0.91		1.54			2
SNP_A-8555523	rs1596231	CXCL13		1.14													1.02		1.16	0.79						1.26		2.22	0.88		1.33		1
SNP_A-1930613	rs6632450	CXorf22																			2.79							1.03					1
SNP_A-1949308	rs6632445	CXorf22																			1.41							2.05				1.22	1
SNP_A-8374746	rs12038480	CYB5RL			0.99	0.94		1.56	1.35		1.54	1.35		1.48	1.42		2.11	1.09	1.33									1.46		1.33		1.45	1
SNP_A-1895829	rs8034835	CYP19A1		0.86	0.7	1.04	1.11			2.28			1.06			1.08		0.97	0.85			1.08		1.01	0.91			1.14	0.84	1.48			1
SNP_A-4273071	rs12595627	CYP19A1		1.46	1.28	0.94	0.92	1.09						2.26		2.29						1.1		0.81	0.66								2
SNP_A-2217993	rs1570669	CYP24A1		1.2						1.19		2.89				0.99			1.11			0.76		0.84	1.02	1.05	1.39	1	1.2	0.98	1.24	0.86	1
SNP_A-8337930	rs3886163	CYP24A1																								1.39			1.02		2.23		1
SNP_A-4268654	rs7896133	CYP2C18																				2.02											1
SNP_A-8479695	rs7914753	CYP2C18	0.87				1.09	0.95	0.66	2.2	1.09			1.53			1.1	1.44		0.86		0.89								1.07			1
SNP_A-4273452	rs2271798	CYP2J2	1.17	0.77	1.23		1.8	0.71						1.31			2.23	1.55	1.97									0.99		2.53			2
SNP_A-2010046	rs6533326	CYP2U1	0.9	0.84	1.03									1.2				1.36				0.98		2.67		1.25	1.14		0.86		0.71	1.75	1
SNP_A-8627812	rs4395588	CYP2U1	0.93	0.77	1.16					1.14	1.24			1.83				1.35				0.94		2.1		0.96	1		1.25		1.5	1.47	1
SNP_A-4283929	rs2740565	CYP3A4				1	0.76	1.19	1.31				0.58	1.07		1.1	0.9	0.64	1.2	1.28			0.57	1.31		1.34			0.93	0.93	2.43		1
SNP_A-1874094	rs7687961	CYP4V2	1.04	0.68	0.94	1.15	0.94	1.17			1.01	0.81	1.07		1.06	0.94									1.06	1.4	0.8		2.01			1.12	1
SNP_A-8331738	rs7224711	CYTH1	0.89	0.89	1.04	2.61	0.8	0.89						1.2		0.71		1.12	0.77		1.14	1.12	1.04					0.93		0.97	1.22	1.39	1
SNP_A-1803878	rs2082733	CYTSA	1.23	1.12	0.96					0.97				1.16	1												1.06	2.36					1
SNP_A-1804894	rs4822485	CYTSA			1.03	2.35							0.73	0.96			1.16		1.09							1.17	0.78			1.11	0.81		1
SNP_A-1943254	rs7155203	DAAM1								1.48	2.16		1.19				0.91		1.09	1.58		0.82				1.12		0.88		2.14			2
SNP_A-1885097	rs11207169	DAB1				0.41		1.02			0.99			0.89	1.36		0.58				0.79	0.95	0.92				1.12		0.78	2.2	0.45		1
SNP_A-1926365	rs11207150	DAB1					0.8	1.34	1.44						1.22									2.06		0.96		1.02					1
SNP_A-1936302	rs6669702	DAB1								2.73				1.07	0.92																		1
SNP_A-2027849	rs17117101	DAB1												3.39			0.91	1.15		1.08	1.11	1.01		2.19	1.18		1.37	0.79	1.16				2
SNP_A-2062517	rs3131745	DAB1																											2.19				1
SNP_A-2075836	rs2224215	DAB1						0.63													2.02						1.23	0.6					1
SNP_A-2088388	rs1776184	DAB1				0.78		1.43						0.87	0.52		0.62				1.72	0.99	0.78						2.14				1
SNP_A-4196961	rs1202778	DAB1									0.93			2.04						1.76		0.83		1.7			0.93	0.93			1		1
SNP_A-4221763	rs1797115	DAB1						1.66	2.17						0.85	0.96						0.91		1.53									1
SNP_A-4273968	rs558475	DAB1	0.87																	1.07		1.42							2.01				1
SNP_A-8466767	rs8083368	ALPK2			1.44				1.31			1.28	2			1.12					1.28	1.42						1.1			0.81		1
SNP_A-8401042	rs501582	DAB1					0.72	1.68		0.66		2.38		2.41			0.93	0.67			1.5		1.64	1.29	0.95		1.61			1.36		1.35	2
SNP_A-8632312	rs821527	DAB1	0.81					1.29									1.54				1.34	0.62	1.05		0.84				2.05		1.78		1
SNP_A-8502690	rs1408889	DACH1				0.74																							1.55			3.42	1
SNP_A-8568334	rs9318032	DACH1												2.11					1.26	0.82				0.49					0.99	0.73		1.77	1
SNP_A-8358441	rs6623600	DACH2								1.4			1.29												1.2			1.65		2.41			1
SNP_A-1967414	rs821551	DAP3			0.85				1.03	1.17				1.21									1.69			1.34					1.37	2.22	1
SNP_A-1936337	rs7044579	DAPK1		0.9	1.15	0.43		0.99	0.83	1.15		1.45				2.04		0.6	1.01				0.82			1.18	0.83	1.24	0.83	1.56		0.86	1
SNP_A-1997150	rs12378187	DAPK1	1.19				1.02						0.97	1.09	0.88	0.99				2.18		0.84			1.03	0.94	0.97		0.81		1.32		1
SNP_A-2255313	rs7855623	DAPK1					0.73					1.01	0.99	0.8	1.15	2.16						0.97			0.88		0.98	1	1.18		1.03		1
SNP_A-8298673	rs1861829	DAPK1	1.14		1	2.27			0.93					0.93			1.06	1.02							1.02	1.06					0.91	0.77	1
SNP_A-8385048	rs10122321	DAPK1		0.8			0.93	1.02								2.14						1.03		0.87		0.93				0.81	0.96	1.09	1
SNP_A-8395462	rs10868614	DAPK1	0.83				0.83						0.7	1.06	1.02	1.19				2.03		1			1.08	0.94	0.75		0.84		0.93		1
SNP_A-8592310	rs13292547	DAPK1	0.76	1.01	1.11	0.88	0.89	1.1	1.12	0.73		1.11				0.94		1.17	1.01	1.02			0.91			2.72	0.97	1.13	0.85	1.15		1.04	1
SNP_A-2153018	rs17029573	DAPP1					0.56						1.12		1.77									1.28						2.11			1
SNP_A-8700300	rs11166413	DBT				2.14	1.13				1.16		1.03			0.93			1	1.03										1.98			1
SNP_A-1795155	rs7231528	DCC	1.48									1.48	1.43	1.35			1.25	1.4	0.89	0.91	0.97	1.12		1.01	0.98	0.92	0.76		0.93	2.49	1.29		1
SNP_A-1858460	rs1301943	DCC												2.03	1.05		1.26	1.07	0.86	0.9		0.92	0.8	1.22		1.23							1
SNP_A-1858638	rs16955354	DCC												0.83					1.12		2.42					1.44							1
SNP_A-1876680	rs1787729	DCC	0.89		0.71				0.81	0.78	0.84		0.87	1.22	0.96	0.75	0.9	0.98		0.77				1.13	0.68	2.58	0.98		0.84		1.29	0.77	1
SNP_A-1912697	rs1144100	DCC				3.03					1.33								1.53										0.96				1
SNP_A-2039618	rs11082964	DCC	0.7			1.3		1.46	1.53					1.73					0.93		0.87		0.64	1.2					1.75	1.25	2.12		1
SNP_A-2064278	rs1841305	DCC	1.36		1.05	1.46						1.15		2.07			2.86		1.08		1.25		0.91	1.26	0.86				0.73	1.38	2.35		3
SNP_A-2074851	rs1573410	DCC	1.11							0.91									2.33	0.9	1.8		0.69					0.9		1			1
SNP_A-2087344	rs12962177	DCC						0.69			1.48	0.71				0.58							1.53	3.42							1.78		1
SNP_A-2134812	rs4078161	DCC	0.56											1.35			0.92	0.96	0.43		1.06		0.89	2.91		1.16						0.74	1
SNP_A-2149379	rs1573409	DCC	2.05																2.76	1	3.36												3
SNP_A-2152397	rs1144077	DCC						2.21							1.55		0.91	0.75	0.84	0.93		0.92	0.92	1.06		0.92							1
SNP_A-2159626	rs4940227	DCC		1.16				0.81		1.59				1.39				0.83					0.94	0.85	0.96	1.19	1.15			1.04	3.24	1.25	1
SNP_A-2162303	rs7229493	DCC	1.14			2.55													1.69		1.46		1.31						0.74		0.48		1
SNP_A-2196930	rs4939699	DCC						0.71			0.94	0.84				0.62							1.56	2.43			0.81	0.64			1.56		1
SNP_A-2250230	rs17755154	DCC								2.71	1.08										1.02			0.75									1
SNP_A-2272791	rs17755653	DCC									2.06										0.85			0.6									1
SNP_A-4221070	rs1460199	DCC	0.51					1.07			2.01					0.45											0.75				1.01		1
SNP_A-8316063	rs9964174	DCC		0.99	1.05				1.07			1.12		0.77			1.4	1.25	0.98	1.25		0.71			0.95							2.05	1
SNP_A-8333087	rs2045154	DCC		0.76	1.5					1.04	1.07			1.3	2.04		1.42	0.94	0.89		1.14		0.98			1.5	1.09						1
SNP_A-8346376	rs1145261	DCC												2.79	0.91		0.34	0.75	0.88	0.95		0.75	1.02	0.8		0.92							1
SNP_A-8365078	rs8094822	DCC		1.29		2.01																											1
SNP_A-8458361	rs1460191	DCC				0.86					2.13										1.02			0.73				0.93					1
SNP_A-8492735	rs1893569	DCC						1.26		0.91				1.03				1.14	0.94					0.83	0.95	1.31	1.24	1.05		1.74	2.06	1.14	1
SNP_A-8507370	rs9956477	DCC																1.04	0.69							2.75					1.2		1
SNP_A-8507511	rs16955910	DCC						1.33															1.19			1.54		1.69			2.42		1
SNP_A-8517078	rs12969035	DCC		0.82	1.19	1.08	0.91							1.25	1.5		0.76	0.93									1.22			2.04	1.16		1
SNP_A-8527010	rs921734	DCC									2.06					0.88	0.84																1
SNP_A-8570813	rs7233997	DCC	1.34		1.02				2.07					2.55				1.29	1.38		0.82		1.32	1.24		0.95				1.5		1.51	2
SNP_A-8582402	rs2035029	DCC												2.12					0.89		2.08												2
SNP_A-8626462	rs986141	DCC				0.96		1.32			0.75					2			1.15									1.03	1.19		1.81		1
SNP_A-8634971	rs12455371	DCC	0.93									2.19											0.67	1.12									1
SNP_A-8655217	rs9949889	DCC	0.68					1.26									1.28	0.89	0.57		0.93			2.62							1.02		1
SNP_A-2042383	rs16888894	DCDC2		0.8		0.48	1.08			2.03		1.29			1.18	1.4	1.73	1.28		0.86	0.93			1.13	1.29	1.34		1.02		1.57	1.24		1
SNP_A-2136345	rs1770909	DCDC2								2.02		0.73					0.71				0.49				0.97				0.97				1
SNP_A-4215128	rs1615548	DCDC2								1.89		0.91					0.81	1.65			0.72				0.7			2.14			0.82		1
SNP_A-1827298	rs12643125	DCHS2									1.67			1.16	1.36	2.06	0.89					1.54						0.82					1
SNP_A-1951394	rs4696582	DCHS2							2.99														2										2
SNP_A-2312036	rs11726534	DCHS2	1		1.07		0.63	0.86				1.63		1.48		1.11	1.29				0.94				0.86	0.81			0.94		3.24		1
SNP_A-4270910	rs6811271	DCHS2				1.96					1.63	1.14		1.2				1.03			0.84			0.99								2.11	1
SNP_A-8295140	rs7660343	DCHS2	0.98		1.21						1.08						2.25		1.2			1.07	0.72	1.13	0.95					1.01			1
SNP_A-8504288	rs17031566	DCHS2	0.65			0.76				1.13	1.79		1.05	1.11		1.1	1.11		1.54		0.6	1.43	0.78	2.07	0.9					1.74			1
SNP_A-8514144	rs1490684	DCHS2									0.81			3.37				1.06															1
SNP_A-8598148	rs11099951	DCHS2						0.63					1.27	0.71				1.41				1.38		1.72	1.87				1.08	2.2			1
SNP_A-2053932	rs7981254	DCLK1					0.84	0.79		1.16						2.09					1.06		1.05										1
SNP_A-4210618	rs6535725	DCLK2								2.31																					1.09		1
SNP_A-2162644	rs12507552	DCTD			1.37							2	1.27						0.97		0.79						0.81	1.08	1.49			1.02	1
SNP_A-8648412	rs4859259	DCUN1D1			1.33	0.82							1.14	1.31	1.87					0.84							1.04	1.01	2.61	1.7			1
SNP_A-1910265	rs17099679	DDAH1	1		0.71						0.79				0.91	0.89	1.06									0.77	0.91			1.23	2.12		1
SNP_A-8544605	rs12134668	DDAH1	1.26	1.07			2.43			0.73		1.02	0.8	0.96	1.05										1.68			0.91	0.96		0.94		1
SNP_A-8580845	rs17127878	DDAH1			0.87					0.63														2.2			0.77						1
SNP_A-8711696	rs17127565	DDAH1					0.73			1.27		1.18			2.32						0.79				1.37						0.7		1
SNP_A-1791269	rs4559477	DDR2	0.92				1.26		1.14	2.5				1.13		0.81		0.63	0.79		1.99			0.77			1.03	1.17		1.59	1.11		1
SNP_A-2288252	rs1780007	DDR2	1.37	1.13			1.01		0.96	0.89				0.94	0.96	0.94				0.73	0.9	1.16		0.93	0.9		0.96			2.51			1
SNP_A-8553685	rs4542196	DDR2	1.22				0.63		0.84	1.08				1.14	1.08	0.99				1.2	1.06	1.09		0.95	1.21		1.25			2.07			1
SNP_A-2002232	rs2162158	DDX10			1.34			1.05				2.03	1.2		1.28		0.87		1.46		0.79					1.04			1.76		1.2		1
SNP_A-2304912	rs5750609	DDX17				1.01					1.19				2.55			0.94									0.96	1.01	1.07	0.92			1
SNP_A-8692208	rs7091868	DDX18				1.26						0.97		0.82							0.55					2.1		1.09	1.01				1
SNP_A-2248036	rs11846532	DDX24																			0.86	1.11	1.02					0.99	2.02		1.17	0.91	1
SNP_A-8687677	rs6635060	DDX26B		1.01				0.79					1.08				2.2											1.96					1
SNP_A-1811756	rs386865	DDX31					0.89	1.17			1.11	0.97	0.89		1.12		1.02	1.21					0.94	0.9		0.92	0.91	0.92	1.04		2.17		1
SNP_A-1857161	rs306555	DDX31					1.21	0.98			1.3	1.47	0.76	0.98	1.43		2.46	1.2					1.02	1.25		1.4	0.85	1.32	1.36		1.13		1
SNP_A-4249880	rs184252	DDX31					1.16	1.05				1.06	1.47	1.37	2.06		1	1.09					1	0.94		0.87	1.14	0.71	0.9				1
SNP_A-1901871	rs6488560	DDX47		1.31					1.2		1.06								0.99		1.39							2.12				1.31	1
SNP_A-4281157	rs2289057	DDX56	0.94	1.13			1.01	0.99		1.45	1	1.04		1.1	0.98	0.96			1.11	1.02							1.07	0.95	2.47		1	0.88	1
SNP_A-8311832	rs639949	DDX58				2.3	1.07		0.9					0.96	1.09												0.91					1.28	1
SNP_A-8561670	rs658253	DDX58				1.15	1.06		2.01					1.09	1.43								1.18									0.79	1
SNP_A-1883227	rs663261	DDX60												2.2																3.55			2
SNP_A-2032871	rs3763962	DDX60				1.13										2.69												1.17		0.74	1.07		1
SNP_A-2098254	rs6552559	DDX60				2.15										1.07												1.02		1.09	0.89		1
SNP_A-2283192	rs3805396	DDX60				2.28										1												1.08		1.02	1.28		1
SNP_A-8659492	rs590272	DDX60		1.41			1.34		1.47				2.01	1.07					1.04		2.14		0.75		0.88	1.11							2
SNP_A-1979845	rs10004447	DDX60L			1.04																				0.92					2.31			1
SNP_A-4192543	rs2130136	DDX60L																												2.02			1
SNP_A-4299577	rs497151	DDX60L		0.75			2.05			1.02				1.14			1.75		1.02								0.96						1
SNP_A-8442621	rs11938927	DDX60L			0.73		1.59																1.02						1.06			2.56	1
SNP_A-1786846	rs2491351	DENND1A					1.66	1.2	2.16	1.43			1.33	1.1		1.22	1.58				1.45	1.16	1.26				1.04			0.83	1.28		1
SNP_A-2108439	rs2808396	DENND1A					0.95				1.14	2.1						1.33		1.54				1		1.04					0.97		1
SNP_A-2126577	rs1833464	DENND1B				2.77	1.44		0.9														1.04		0.8			0.95	0.95				1
SNP_A-2293357	rs11583319	DENND1B		1.19	1.12					2.93	0.7				1.11	1.14			0.71	1.37	0.92	1.33											1
SNP_A-8520986	rs17564924	DENND1B		1.1	1.07	2.39				1.04	0.99				0.98	0.93	0.58		0.96	1.02	1.07	1.21											1
SNP_A-1954926	rs4931513	DENND5B	1				1.15		0.97		0.99	2.05	1.13	1.03					1.17			1.4	0.95					1.06	1.37	1.03			1
SNP_A-2136463	rs4931512	DENND5B	0.99	0.98	1.05	1.21	1.38		1.16		0.9	2.44	0.99	1.01				0.93	0.95			1.34	1.15					1.2	1.13	0.94			1
SNP_A-8389934	rs3741877	DENND5B	0.92	1.01	0.85	2	0.92		0.99		0.88	1.04	0.99	1.05				1.03	1.05			1.01	0.91				1	1.04	1.03	1.17			1
SNP_A-8479798	rs10843937	DENND5B					0.94					0.82	1.2					1.02	0.79			1.09	1.3					2.59	1.36	1.53			1
SNP_A-1894643	rs3762282	DEPDC1		0.97	1.25					1.55	0.87																		1.85		2.64		1
SNP_A-1894622	rs8043389	DET1					1.28	0.56	1.17					0.87	0.83				1.01		1.19				1.58			1.04				2.08	1
SNP_A-8603248	rs7402553	DET1						0.71	0.65					1.4	1.15						1.03		1		0.91			0.82	2.4			1.92	1
SNP_A-1903696	rs7046973	DFNB31	0.85			2.12		1.18	1.47	1.4	1.01		1.38	1.53				1.32	1.51	1.11		1.1	0.96	1.21							0.9		1
SNP_A-2249595	rs2800969	DGCR2	1.07	1.22				1.78	1.54				2.33			1.36											1.4	0.95		1.28			1
SNP_A-1848069	rs929522	DGKB	1.02		0.76		1.06		1.16		1.36		1.91					0.33	1.41												2.94		1
SNP_A-2134805	rs1723230	DGKB	0.69								2.19		2.01	0.97		1.25		0.62		1.67		1.12		1.29					1.97				2
SNP_A-2281082	rs6948538	DGKB	1.33								1.37			2		1.15						0.56							0.67				1
SNP_A-4243414	rs1464821	DGKB	1.25	0.86							1.27		1.43	1.57	1.56				1.28			0.83		0.61				0.76			0.99	2.37	1
SNP_A-8518521	rs1404621	DGKB	0.96			2.13		0.75																									1
SNP_A-8526296	rs17168320	DGKB													2.11																		1
SNP_A-1967353	rs1441092	DGKD						0.93		0.88														2.06	1.03				0.88			0.73	1
SNP_A-2212959	rs6503774	DGKE		1.35	0.86			0.79									0.84					0.62		3.34			0.63						1
SNP_A-1953544	rs3732940	DGKG		1.06								1.09			1.31	0.69		1.03	1.01	1.29		2.08	0.9		1.05		0.95	1.07	0.7		0.98	0.78	1
SNP_A-2130662	rs9533042	DGKH				1.36			1.8				0.97			2.44	1.54	1.05	0.77	1.59		1.13		1.54	0.78					0.98	2		2
SNP_A-1810614	rs834085	DGKI		0.96	0.74		1.74							1.53					0.61	0.88		2.45	1.1					0.66					1
SNP_A-1815007	rs12530646	AKAP9		1.2	1.19			0.96				1.05	0.64		0.73		2.32		0.98														1
SNP_A-2097188	rs1723100	DGKI	1.05							0.55						1.14											0.63			2.34			1
SNP_A-2147761	rs1424372	DGKI		0.89			0.91	0.61	2.47			1.57		0.96		1.63		0.8				0.95	1.05					1.18	1.67	1.96		1.21	1
SNP_A-2208480	rs7793852	DGKI		1.33			0.94									0.97										2.41		1.89		0.65	1.66		1
SNP_A-4212687	rs1723093	DGKI	1.23					1.56		2.16						0.9											1.21			0.89			1
SNP_A-4295764	rs12707359	DGKI		1.23			1.52									1.58												2.32		1.38	1.36		1
SNP_A-8282369	rs2882591	DGKI	0.78	0.66		0.52	1.3	1.22		1.33		0.55		3.26			1.03			0.81		0.4		1.04	1.1		1.19	1.35	0.99		0.7	0.86	1
SNP_A-1922521	rs2815136	MUTED	1.29	1.01		1.37	1.31							1.08		1.12			1.13	1.17	0.84		1.17	1.33	0.79	0.68		2.09				1.26	1
SNP_A-8282796	rs10249007	DGKI	0.94						1.28				0.98	1.28				0.79	0.9	0.99	1.29					0.85	1.23				2.24		1
SNP_A-8282801	rs748260	DGKI				0.54		0.51	1.09	0.7	0.97	0.95	1.25	1.03	0.77		0.7		1.17	0.9			1.03					2.01	1.01	1.34		0.89	1
SNP_A-8384281	rs10156124	DGKI				0.74												0.91			1.36		1.11									2.03	1
SNP_A-8386966	rs834433	DGKI	1.21					1.27		0.6						1.23											1.28		1.14	3.27			1
SNP_A-8396470	rs6944527	DGKI		0.64			1.08	0.83	2.07			1.13		0.99		1.11		0.79				1.14	1.02					1.87	1.64	0.63		0.73	1
SNP_A-8397291	rs2030970	DGKI	0.95	1.19			1.26	0.85		0.73		1.23					1.38					0.97			1.11		0.96	1.72	1.09		1.03	2.49	1
SNP_A-8417826	rs2030969	DGKI	1.07	1.3			1.35			1.05		1.37					1.36					0.84			1.66		0.96	1.7	0.97		1.16	2.62	1
SNP_A-8504661	rs4732260	DGKI	1.68		0.94															0.88								2.1					1
SNP_A-8331003	rs12422045	DHCR7	1.14	1.34				2.11		1.69		0.83		1.43	1.26			1.43								1.41				1.21	0.77		1
SNP_A-4207771	rs4892831	DHRSX	1.06	1.06		1.41		0.97	1.02	1.13	1.41	3.87	0.9	1.78	1			1.08	0.97			0.87		0.99	0.97			1	0.85	1.33	1.47	1.1	1
SNP_A-2082313	rs8121775	DHX35	0.94		0.95			1.05	1.03			1.43	0.89	1.09	1.1		1.49		1.23	1.31		3.25	0.91							1.06	0.85	0.94	1
SNP_A-2311515	rs3099945	DHX57			0.98					0.75					1.4	0.89	1.34						2.43				0.9		0.98				1
SNP_A-1937764	rs17337805	DIAPH2							0.64				1.57								1.12	1.31				0.47		0.94				2.35	1
SNP_A-8588070	rs1922018	SDK1	0.88				1.09		2.02		0.86	0.84			1.1						0.86			1.03	0.99	0.86	0.97	1.13				1.15	1
SNP_A-2217611	rs829296	DIAPH2						0.84	2.09	1.14			0.96									0.58			1.18	0.66							1
SNP_A-2269565	rs12852036	DIAPH2		1.14									1.36								1.61	1.01						0.31	2.13	0.73			1
SNP_A-8283208	rs1012742	DIAPH2		1.34				1.02	0.47	2.21			0.93								1.2	1.79				0.6				0.79			1
SNP_A-8522887	rs6615839	DIAPH2						2.47	1.67	0.96			1.12								0.97					0.67				0.66			1
SNP_A-8602111	rs6615879	DIAPH2						1.8	1.28	2.05			1.91									1.21				1.49				1.03			1
SNP_A-1832026	rs1350361	DIAPH3	1.04											2.19		0.87	1.53	1.15							1.08	1.03					1.16	0.98	1
SNP_A-2099503	rs9570214	DIAPH3	1.59											1.09					1.27						0.86	2.24					1.51	1.25	1
SNP_A-4198924	rs9538536	DIAPH3	1.1	1.01	1.09		0.92			2.25	1.03	1.07		1.18		0.88			0.9			1.02		1.09	1.08					1.08	1.03	1.06	1
SNP_A-4301636	rs2762132	DIAPH3	1.2				1.28		1.01				1.01	1.58	2.43	2.05	1.72			1.2		1.34			0.95					0.97		1.03	2
SNP_A-8492609	rs341506	DIAPH3	1.02	0.96	0.82		1.3					1.48		1.25	2.18	0.91	1.26		1.25			0.84		1.02	0.86					0.86	1.09	0.78	1
SNP_A-8676761	rs7265084	DIDO1				1.13						0.96		1.55		0.98	0.91	1	0.8	0.95	1.13	0.9				1.12				2.94	0.79		1
SNP_A-8657186	rs225010	DIO2													0.89			2.36					0.98										1
SNP_A-2020768	rs2839274	DIP2A				2.14		0.94			1.31						1.67	0.91											1.07		1.64		1
SNP_A-1795460	rs1478590	DIRC3																	3.16														1
SNP_A-2075131	rs1382436	DIRC3	0.8																1.24										2.06	1.04			1
SNP_A-2101027	rs16857299	DIRC3				2.77																											1
SNP_A-2188654	rs1382440	DIRC3																	4.15														1
SNP_A-4238971	rs10164888	DIRC3				2.82						1.31				1.02					1.29			0.65		1.05			0.98	0.76		1.19	1
SNP_A-8586776	rs4674141	DIRC3		1.13			0.95				1.16			3.21		1.24			1.03	1.02	0.99					0.83	1.51		0.88		1.15	2.34	2
SNP_A-1792543	rs3100608	DIS3L2					0.84						2.25		0.89		1.35	0.82		1.14		0.97											1
SNP_A-1883311	rs12473319	DIS3L2					1.4	1.09	2.28			1.1		1.85		1.75		0.91			1.1			1.42	1.02		1.35				1.08		1
SNP_A-1967326	rs3116231	DIS3L2					0.98		2.43				0.86		1.7		0.91	1.19		0.8		1.3											1
SNP_A-1967331	rs2101435	DIS3L2					0.99		1.75			0.93	0.95		0.98	0.78		1.03				1.29			0.93							2.08	1
SNP_A-2071613	rs2342291	DIS3L2					0.78		1.4				1.12		1.14		0.83	5.6		1.28		1.1											1
SNP_A-2131430	rs1108677	DIS3L2					1		2.36				1.08		0.96		0.95	0.97		1.1		1.02											1
SNP_A-4262622	rs10498260	DIS3L2					0.83		2.44			0.64	0.85		1.88		1.16	1.07		0.98		1.16											1
SNP_A-8297741	rs3100606	DIS3L2						1.17					1.31	0.9	2.35	1.12	1.02			0.92		1.1		0.97	1.02		1.1			2.29	1.16		2
SNP_A-2070260	rs821645	DISC1	0.79			0.4		2.55	0.67	1.39				1.35			1.02		0.68												0.73		1
SNP_A-8367744	rs1094401	DISC1	2.07				1.64											1.09				1.02	1.14	0.75			1.48	1.01		0.87			1
SNP_A-8391734	rs16855090	DISC1		0.72				1.25													1.36		0.69		0.9	1.02				0.96	2.07		1
SNP_A-8472197	rs16855093	DISC1		0.88				2.02													1.84		0.98			0.37				1.31			1
SNP_A-8541648	rs4658933	DISC1	1.37	0.83	1.49		2.08			1.97		1.11	0.51				0.92	1.14	1.17	0.92		0.87	0.87	1.68	1.45				0.45				1
SNP_A-8668552	rs1535530	DISC1					1.08	1.12							1.37		1.45	1.12			0.8	0.97	2.03			0.76							1
SNP_A-2232123	rs2789976	DISP1	1.03	0.75	1.73		1.53	0.7			3.13					0.72		0.82			0.86		0.98	1.35		2.03		1.24					2
SNP_A-8395489	rs2254329	DISP1							2.07																								1
SNP_A-8445208	rs2609406	DISP1		1.07			1.05	0.63			0.78			2.6	1.29			0.79			0.82				0.89	0.93			1.31				1
SNP_A-8487768	rs2081508	DIXDC1		1.57									2.84			0.82	1.7	1.05			1.24	1					1.01					1.07	1
SNP_A-2150671	rs2278149	DKFZP564O0823			0.93		1.38		1.29	0.91		2.01			1		1.02			2.07	1.66	0.94	1.12		0.92	0.9	0.77			1.88			2
SNP_A-8389985	rs6534199	DKFZP564O0823				1.59	0.86				1.31	1.67	1.21		2.15			0.97		1.11	0.84		1.23				0.79	1.08					1
SNP_A-1891548	rs7236071	DKFZP781G0119		0.76	0.92						1.98						2.76	0.75	1.78				0.65							2.38			2
SNP_A-8605942	rs7779702	DLD	0.82					1.18	1.35	1.43	0.98	1.08						1.28	1.6	0.97	1.74	1.51	1.04			1.3	0.89	1.32				2.99	1
SNP_A-1833023	rs433811	DLG1	1.77				0.69	0.89		0.98			0.62	0.83	0.64	1.03	1.3		1.04			1.46		1.15			1.24		0.76	2.48	1.65		1
SNP_A-1780560	rs516620	DLG2																							2.46								1
SNP_A-1800245	rs10898127	DLG2								1.17	2.08										1.26				0.74				1.27				1
SNP_A-1846622	rs286526	DLG2		0.77	0.97					1.47		0.82		1.06		1.33			1.56	0.83		0.81	1.25	0.71	1.43	0.91	0.89	2.33			0.73		1
SNP_A-1856095	rs182990	DLG2		1.12		2.81	1.49	0.82	0.68	1.13	1.01	1.43	1.2	1.84	1.55			0.85	0.49	1.27	0.67	0.81			0.74						0.68		1
SNP_A-1921611	rs668816	DLG2		1.38		2.05	0.83	2.09	0.73	0.6	0.85	0.81	0.74	1.09	0.84			0.98	0.66	0.61	1.22	0.88			0.72						3.45		3
SNP_A-1951042	rs17206780	DLG2	1.06	0.76		0.64	1.66								0.65	0.56					0.83				0.82			1.33	0.97			2.54	1
SNP_A-2012839	rs10501579	DLG2	0.95																	1.17	2.1	0.91				1.31							1
SNP_A-2012859	rs3907015	DLG2	0.74	0.98							0.7		1.48	2.17	1.36				0.52			0.83	1.08	0.85	1.37		0.84			1			1
SNP_A-2012881	rs10501590	DLG2	1.5										1.41	1.15					1.08	2.07		1.02	0.65	0.65	1.32						1.5		1
SNP_A-2060125	rs349076	DLG2											2.23										0.99										1
SNP_A-2064377	rs10898236	DLG2	0.96			2.18									2.11		0.73			1.22		1.14		1.11	0.74	0.9							2
SNP_A-2073083	rs1876872	DLG2		0.86	1.23		0.71	1.41	1.31				2.29		1.11	1.6										1.13		1.19					1
SNP_A-2090887	rs471786	DLG2								2.13				1.22	0.86					0.92		0.93	1.47	0.82	1.93								1
SNP_A-2121609	rs450444	DLG2					1.96			1.23			2.01	0.98					0.54	1.37		0.67	0.89		1.24						0.99		1
SNP_A-2126111	rs472406	DLG2		0.86		1.82	1.3	0.91	1.51	0.62	1.18		1.1	0.94	0.89				0.9	0.97		0.94	0.93	0.63	1.26		0.69				3.73		1
SNP_A-2138524	rs17147761	DLG2	0.84		1.24															0.98	0.82	1.35				2							1
SNP_A-2166814	rs1559854	DLG2				1.3	2.95								1.08		1.18			0.96	0.87		0.88							1.3			1
SNP_A-2199133	rs2032410	DLG2					0.66						2.09		0.59	1.12										0.91							1
SNP_A-2201025	rs512775	DLG2																		1.22				2.03									1
SNP_A-2256640	rs552017	DLG2																	0.71	0.99				1.08	2.75		0.71				1.16		1
SNP_A-2266807	rs4944512	DLG2					0.67		0.98	2.02			1.01	0.81	0.75				0.89	0.87		1.16	1.3	0.83	0.88		0.95				1.11		1
SNP_A-2295775	rs592622	DLG2																		2.27													1
SNP_A-2308752	rs7121845	DLG2													2.26			0.77			0.94		1.04						1.12		1		1
SNP_A-4215252	rs4143314	DLG2	1.59								1.25		2.01						1.04		1.03									1.23			1
SNP_A-4231242	rs473818	DLG2		0.4				1.39		0.63	1.04		2.13	1.35	0.97	1.15		0.92	3.34	0.87			1.02		1.7						2.08	0.9	3
SNP_A-4281078	rs11234222	DLG2	0.5												2.1	0.95																	1
SNP_A-4284902	rs6592211	DLG2	0.67	0.95			0.87								0.49	2.5					0.82							1.98					1
SNP_A-4301175	rs286024	DLG2			0.95					1.75				1.03		2.26			1.28	1.4		1.04	0.85	1.21	1.51	0.77	0.95				0.89		1
SNP_A-8297684	rs1227671	DLG2	1.35	1.04	0.85	1.03	1.04									0.82		1.02		0.99	0.67	1.51	1.17			2.08		1.79	1.34	1.04			1
SNP_A-8328411	rs10898330	DLG2					1.57			2.18	0.88			0.93	1.17				0.74			1.38		0.77	0.85		0.84				1.27		1
SNP_A-8334686	rs6592202	DLG2		0.62							1.2			0.98									0.98	0.99	1.23			2.72					1
SNP_A-8337207	rs62388	DLG2														0.97			0.93	1.13			0.94		0.98		1.66			1.1	2.01		1
SNP_A-8348793	rs613265	DLG2	1.15																	2.13										0.53			1
SNP_A-8349234	rs286512	DLG2		0.95				0.84		1.17		0.89		2.02					1.08	1.38		1.44	0.88	2.11	1.15	0.87	1.05	1.5			1.15		2
SNP_A-8402709	rs17741917	DLG2								0.87	0.86									2.01													1
SNP_A-8408679	rs1940088	DLG2																														2.21	1
SNP_A-8420316	rs2203702	DLG2					1.18		1.16	3.32			2.17	0.71	0.95				1.32	0.96		1.1	1.06	1.11	0.63		0.95				0.76		2
SNP_A-8519566	rs2449597	DLG2			1.39		1.04	1.1	0.78					1.53			1.33				0.74	1.08	1.28					0.98	1.02		3.06		1
SNP_A-8527950	rs3802894	DLG2				2.13			0.91						2.55		0.64			1.32	1.01	0.95	0.76	1.21	0.96	0.95		1.16		0.87			2
SNP_A-8536655	rs652852	DLG2		1.36			1.52	1.43	0.81	1.29	1.32		0.85	0.84	0.91	0.9		0.73	0.61	0.83	0.58	1.04		0.74	1.04		0.71				2.91		1
SNP_A-8565859	rs2514158	DLG2									1.15						3.43																1
SNP_A-8612680	rs631375	DLG2								0.82			2.2			1.05			1.32		0.7									3.08	2.83	1.31	3
SNP_A-8632429	rs10898316	DLG2	1.03																	1.29	1.09	1.26				2.04							1
SNP_A-8642692	rs2514152	DLG2							3.38																						1.27		1
SNP_A-8679178	rs500059	DLG2	0.83								1.17	0.97			2.26	1.4			1.5	0.89	0.91			0.86			0.93		2.19		1.4	0.73	2
SNP_A-2195851	rs1248895	DLG5	0.98				3.17																				0.99						1
SNP_A-4286633	rs9939115	XYLT1		1.02		2.52	1.24	1.06	0.93					1.02										1	0.85					0.88		1.09	1
SNP_A-2082506	rs9947561	DLGAP1						1.14				0.86	0.76	0.79	2.08		1.44		1.12				1.23	0.85	0.97				0.98	0.89	0.98	0.83	1
SNP_A-1914451	rs7836020	DLGAP2			1		0.87					2.46		0.9	1.01			0.98	1.4	0.73			1.02	1.04							0.91		1
SNP_A-8300465	rs2906590	DLGAP2	0.51	0.99	1.36				1.34		1.08	0.87	1.54		1.25			0.95	2.06		1.39	1.41	0.79	0.84		1.15	1.12	0.68		1.22	1.02		1
SNP_A-2271861	rs17093914	DLST	0.85			0.74				1.04	1.47	1		0.9	1.25			0.88		1.04					0.88					1.15	2.04		1
SNP_A-4276669	rs2070599	DLST	0.89	1.01		0.76		1.75	0.89	1.34			1.07	1.49		1.44	2.54		1	1.22		1.62	1.27	1.21	1.14		1.31				0.99		1
SNP_A-1959100	rs5972354	DMD						0.58		0.93												0.74			1.47				2.34	1.49			1
SNP_A-2107630	rs1293821	DMD		0.65						2.08			0.77				1.3								0.84						1.08	0.35	1
SNP_A-2161308	rs6527185	DMD						2.02																									1
SNP_A-4194145	rs17338542	DMD							0.77				2.16								1.11				0.52					0.68			1
SNP_A-4273343	rs3928369	DMD		0.65					1.23				2.43												0.84			0.97	1.22	1.52		2.14	2
SNP_A-8284891	rs1006211	DMD						1.06	0.99	2.16			0.97												0.92	1		1	1.01		0.81		1
SNP_A-1931692	rs2414111	DMXL2		1.15				0.71							0.97					0.94					1.42			1.12	2				1
SNP_A-2095330	rs2414109	DMXL2		0.74				1.21							1.75					1.14					1.24			1.21	3.15				1
SNP_A-2119453	rs8024233	DMXL2	1.2	1.05	0.71			1.2		3.2					1.03		1.02	0.98		1.02					1.12		1.04	1.86	0.94				1
SNP_A-8486960	rs11070851	DMXL2		0.47							1.41								0.82					2.08				0.7					1
SNP_A-8318876	rs9639396	DNAH11	1.39					1.86								2.41	2.54	1.4	1.99	1.28								0.89		1.92	1.27		2
SNP_A-8597661	rs2965416	DNAH11											2.39																				1
SNP_A-8637744	rs17145154	DNAH11	1.03		0.79		2.49	1.2	0.99					0.88		1.06			1.41	1.03	1.52		1.08			1.16				0.94	1.37		1
SNP_A-8669670	rs10281087	DNAH11						1.08	1.16	1.36	1.29		1.52			1.16								4.86			2.69				0.85		2
SNP_A-8698433	rs10274154	DNAH11																	1.13									2			1.19		1
SNP_A-1918278	rs12491732	DNAH12	1.29						2.39				0.72																				1
SNP_A-8490482	rs4681977	DNAH12				0.87			2.11				1.31	1.11	1.12	1.31			1.03		1.01		1.23			1.11	1.29						1
SNP_A-1842856	rs1506070	DNAH14												2.1									0.78				1.08						1
SNP_A-4220777	rs2449311	DNAH14								0.75			2.04							1.68			1.64	0.85			1.19	0.36					1
[truncated: 6,374 more rows]
